# Supplementary material
Source: MDPI journal article supplement (https://www.mdpi.com/2072-4292/8/12/1016)
Supplement: s1 [file s1]

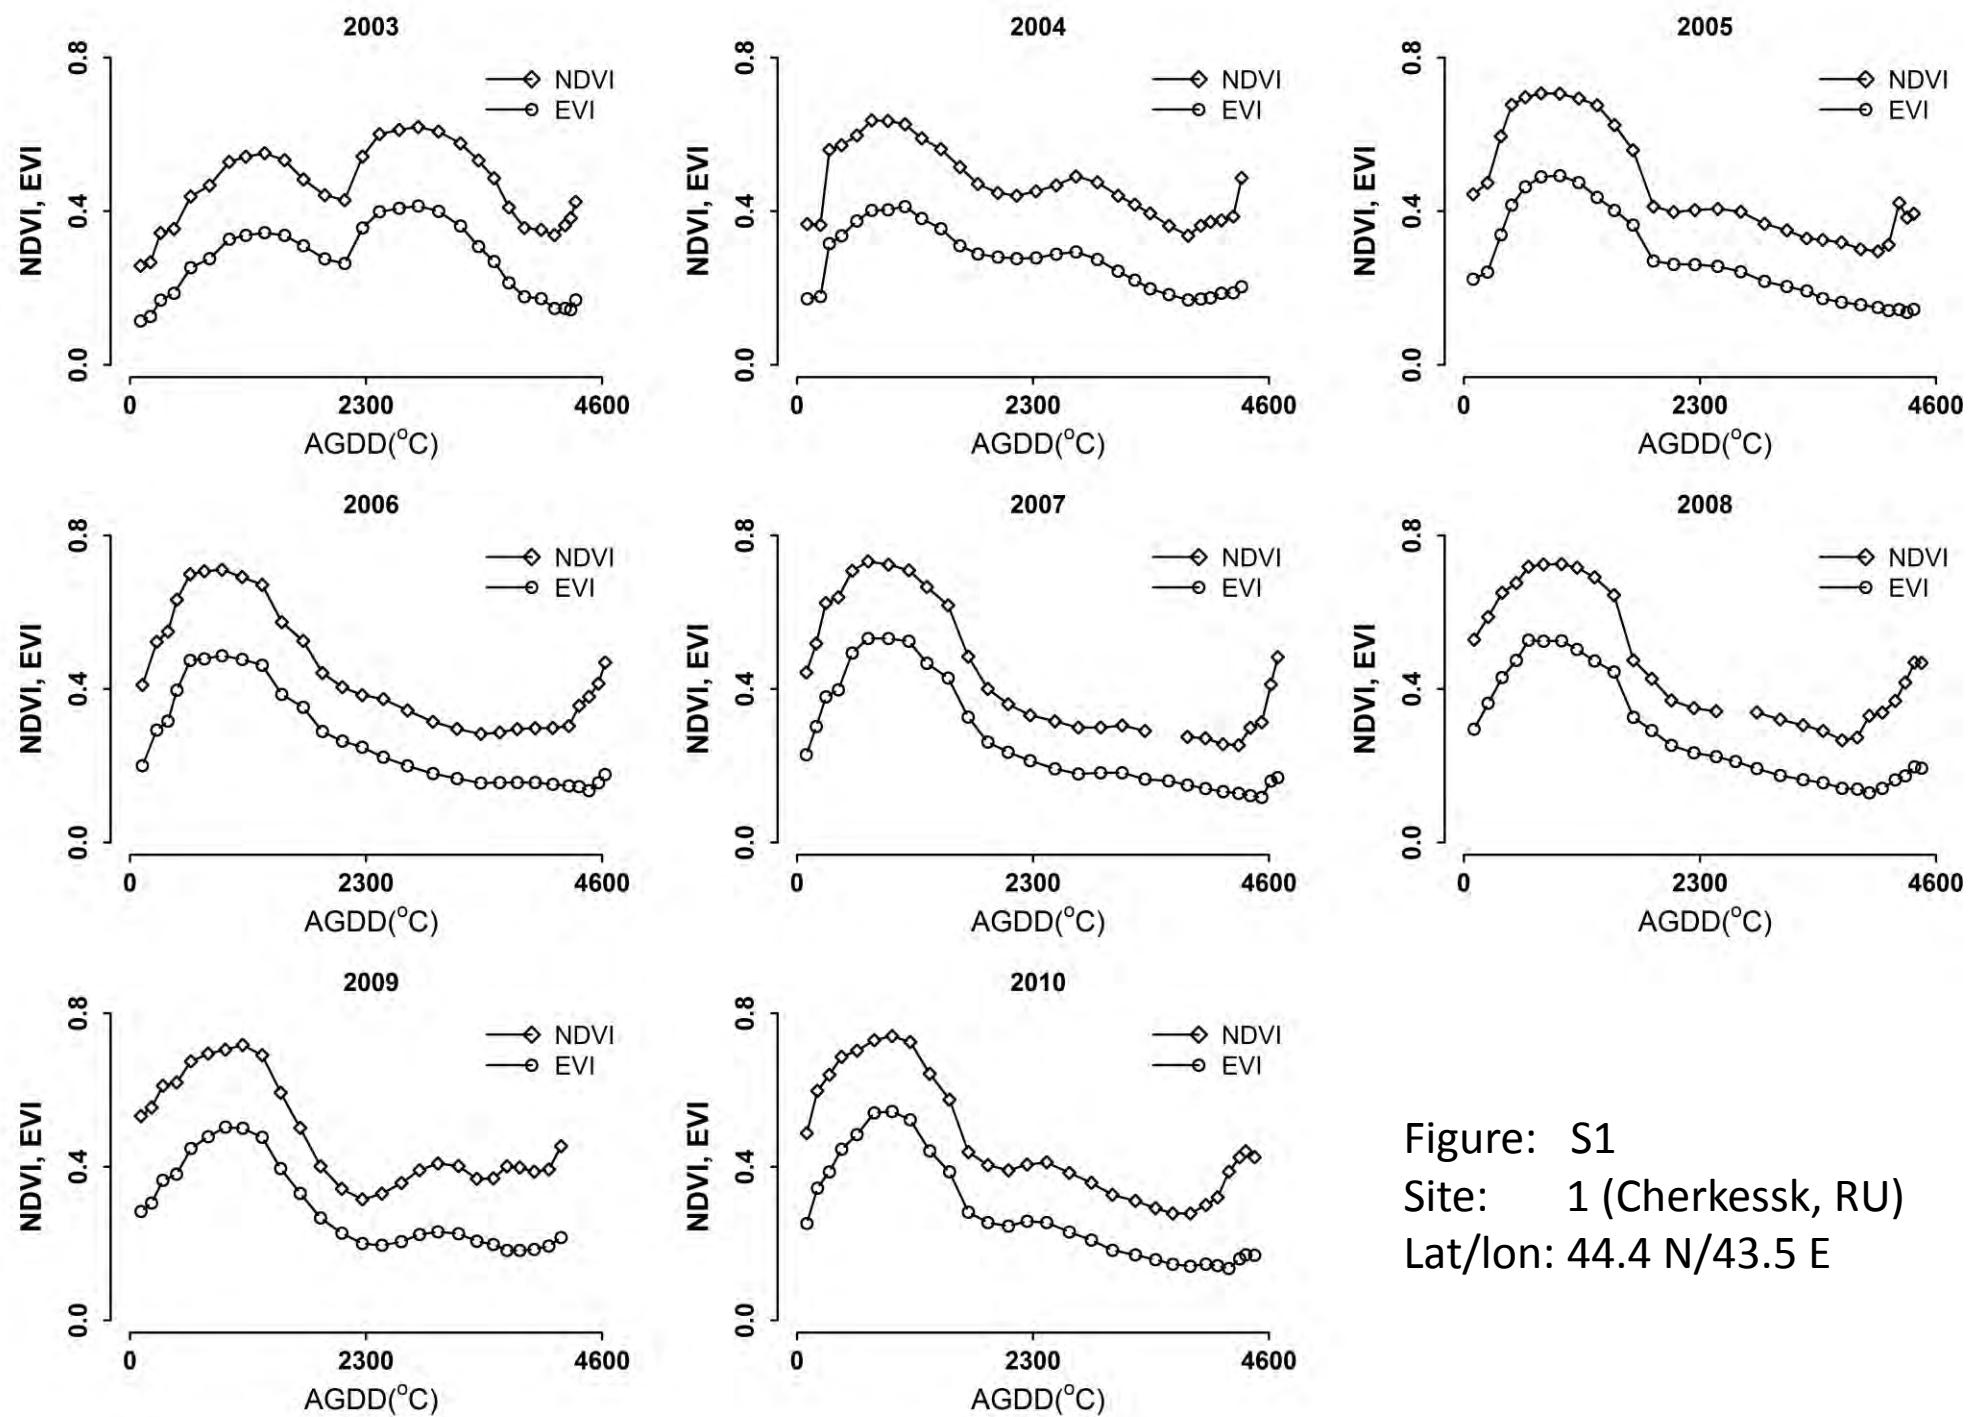

Figure: S1  
 Site: 1 (Cherkessk, RU)  
 Lat/lon: 44.4 N/43.5 E

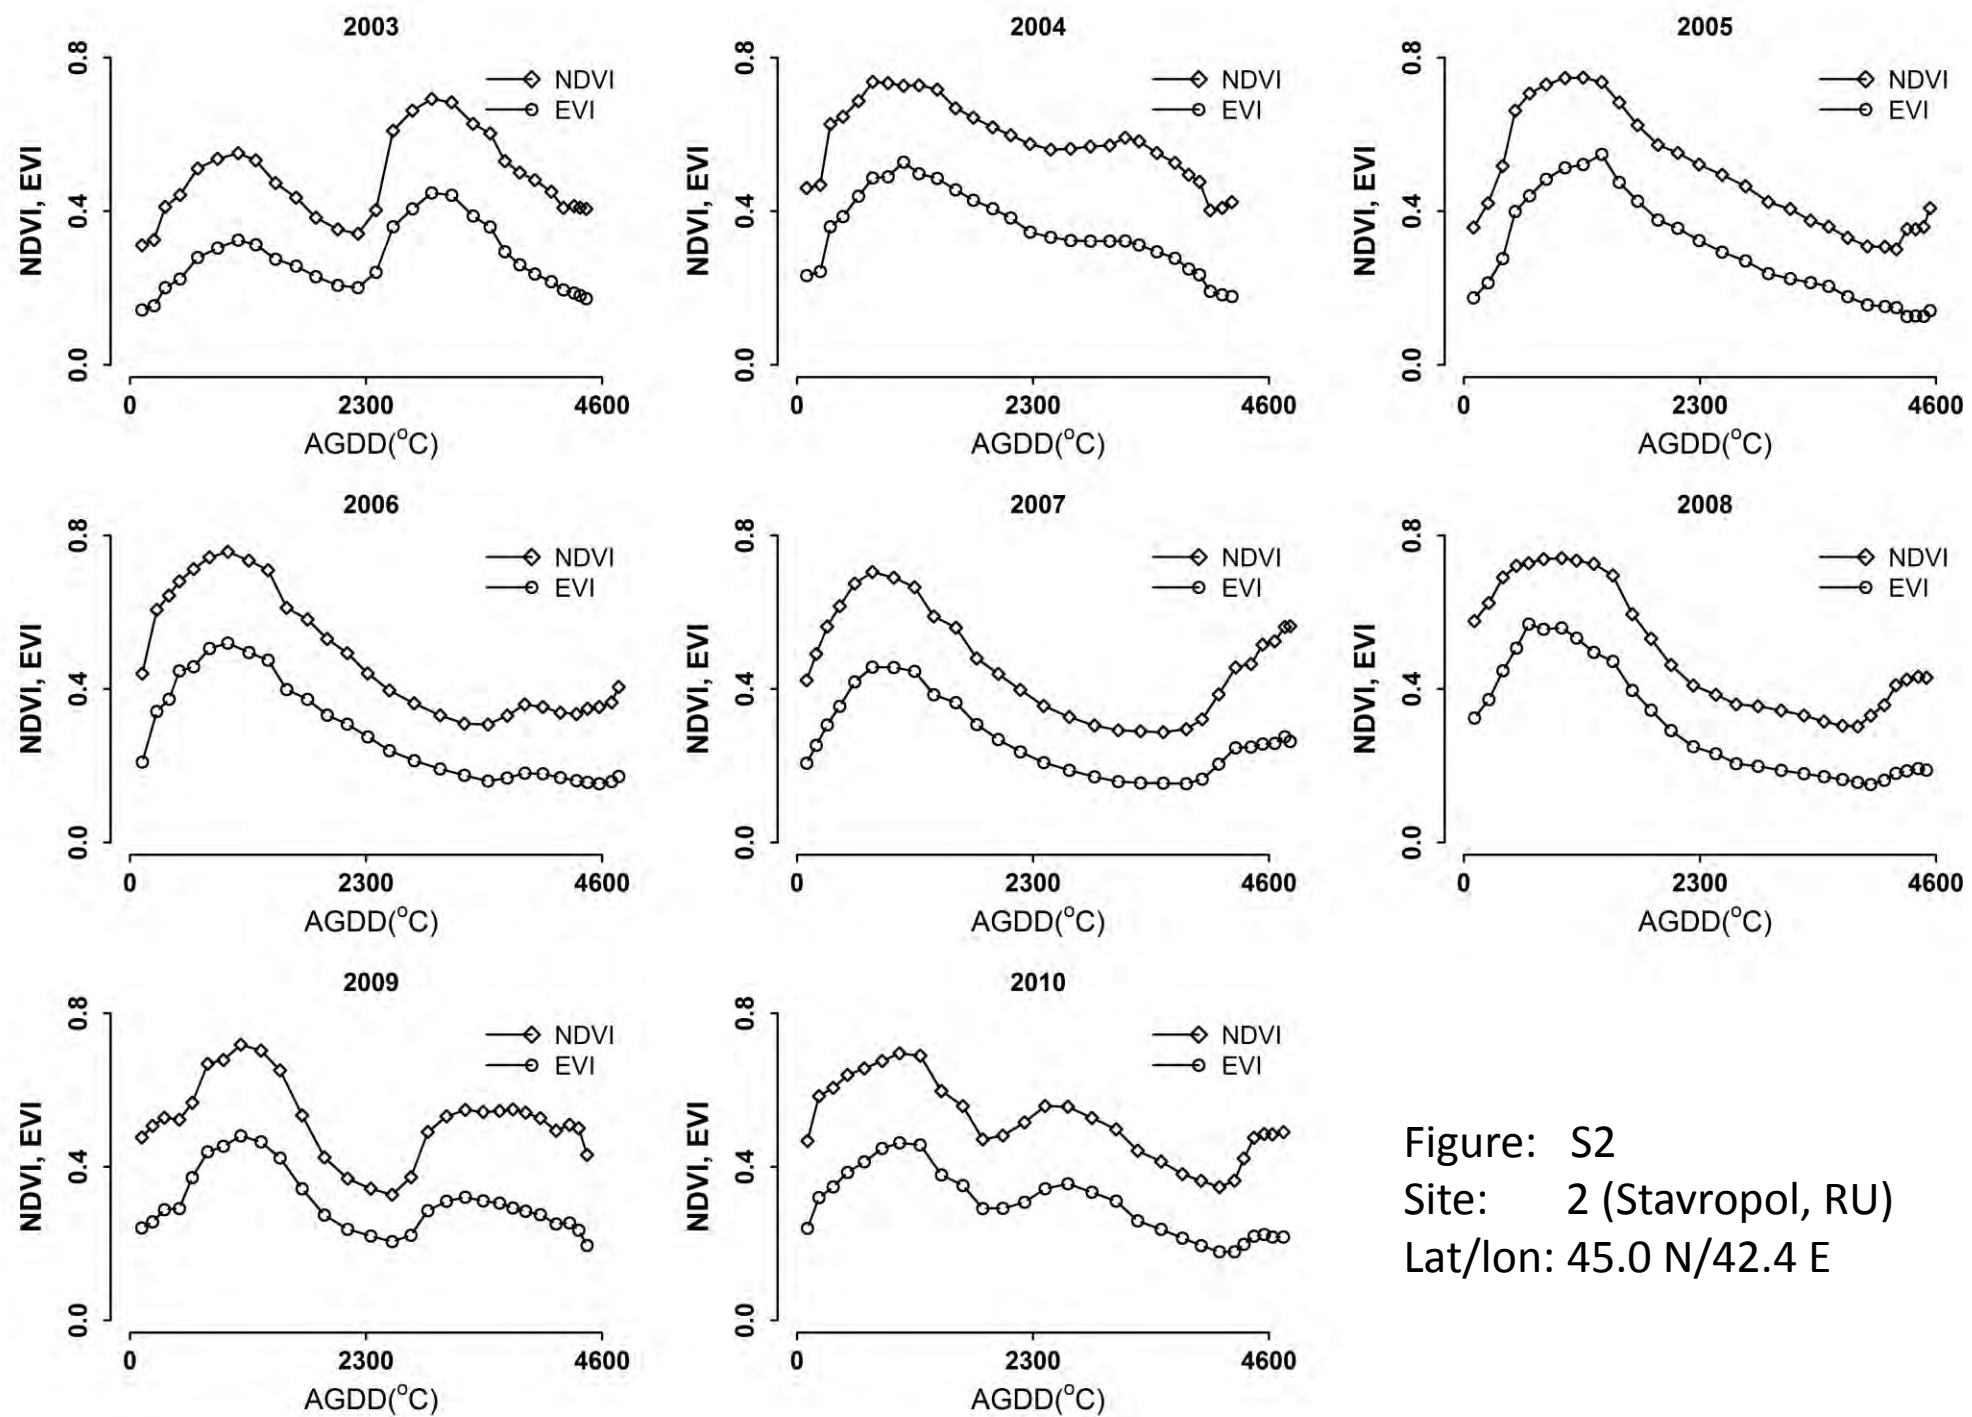

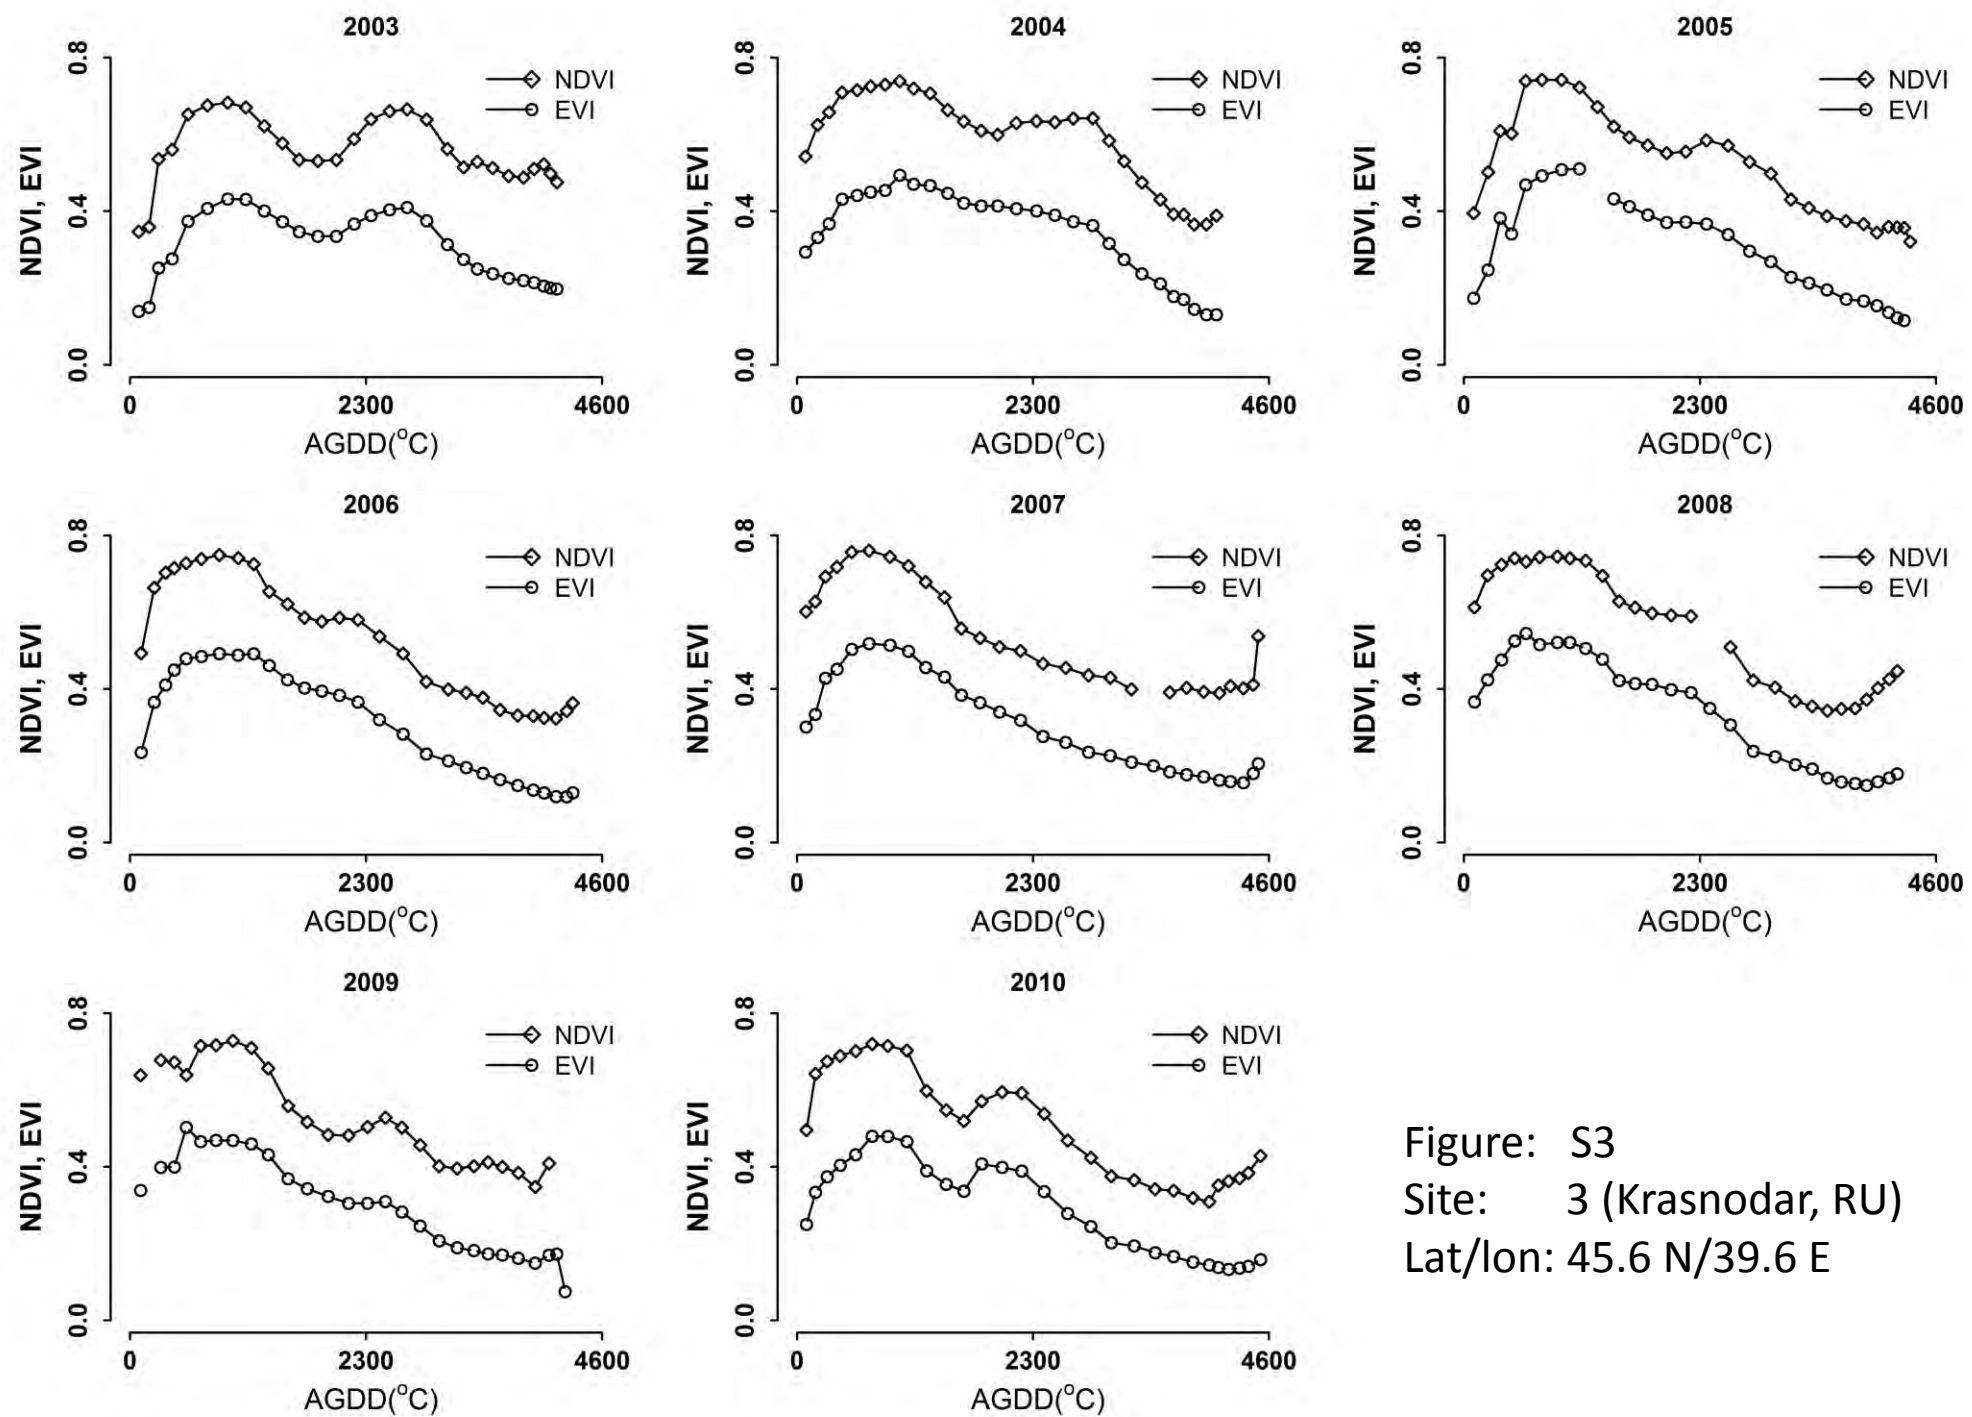

Figure: S3  
 Site: 3 (Krasnodar, RU)  
 Lat/Ion: 45.6 N/39.6 E

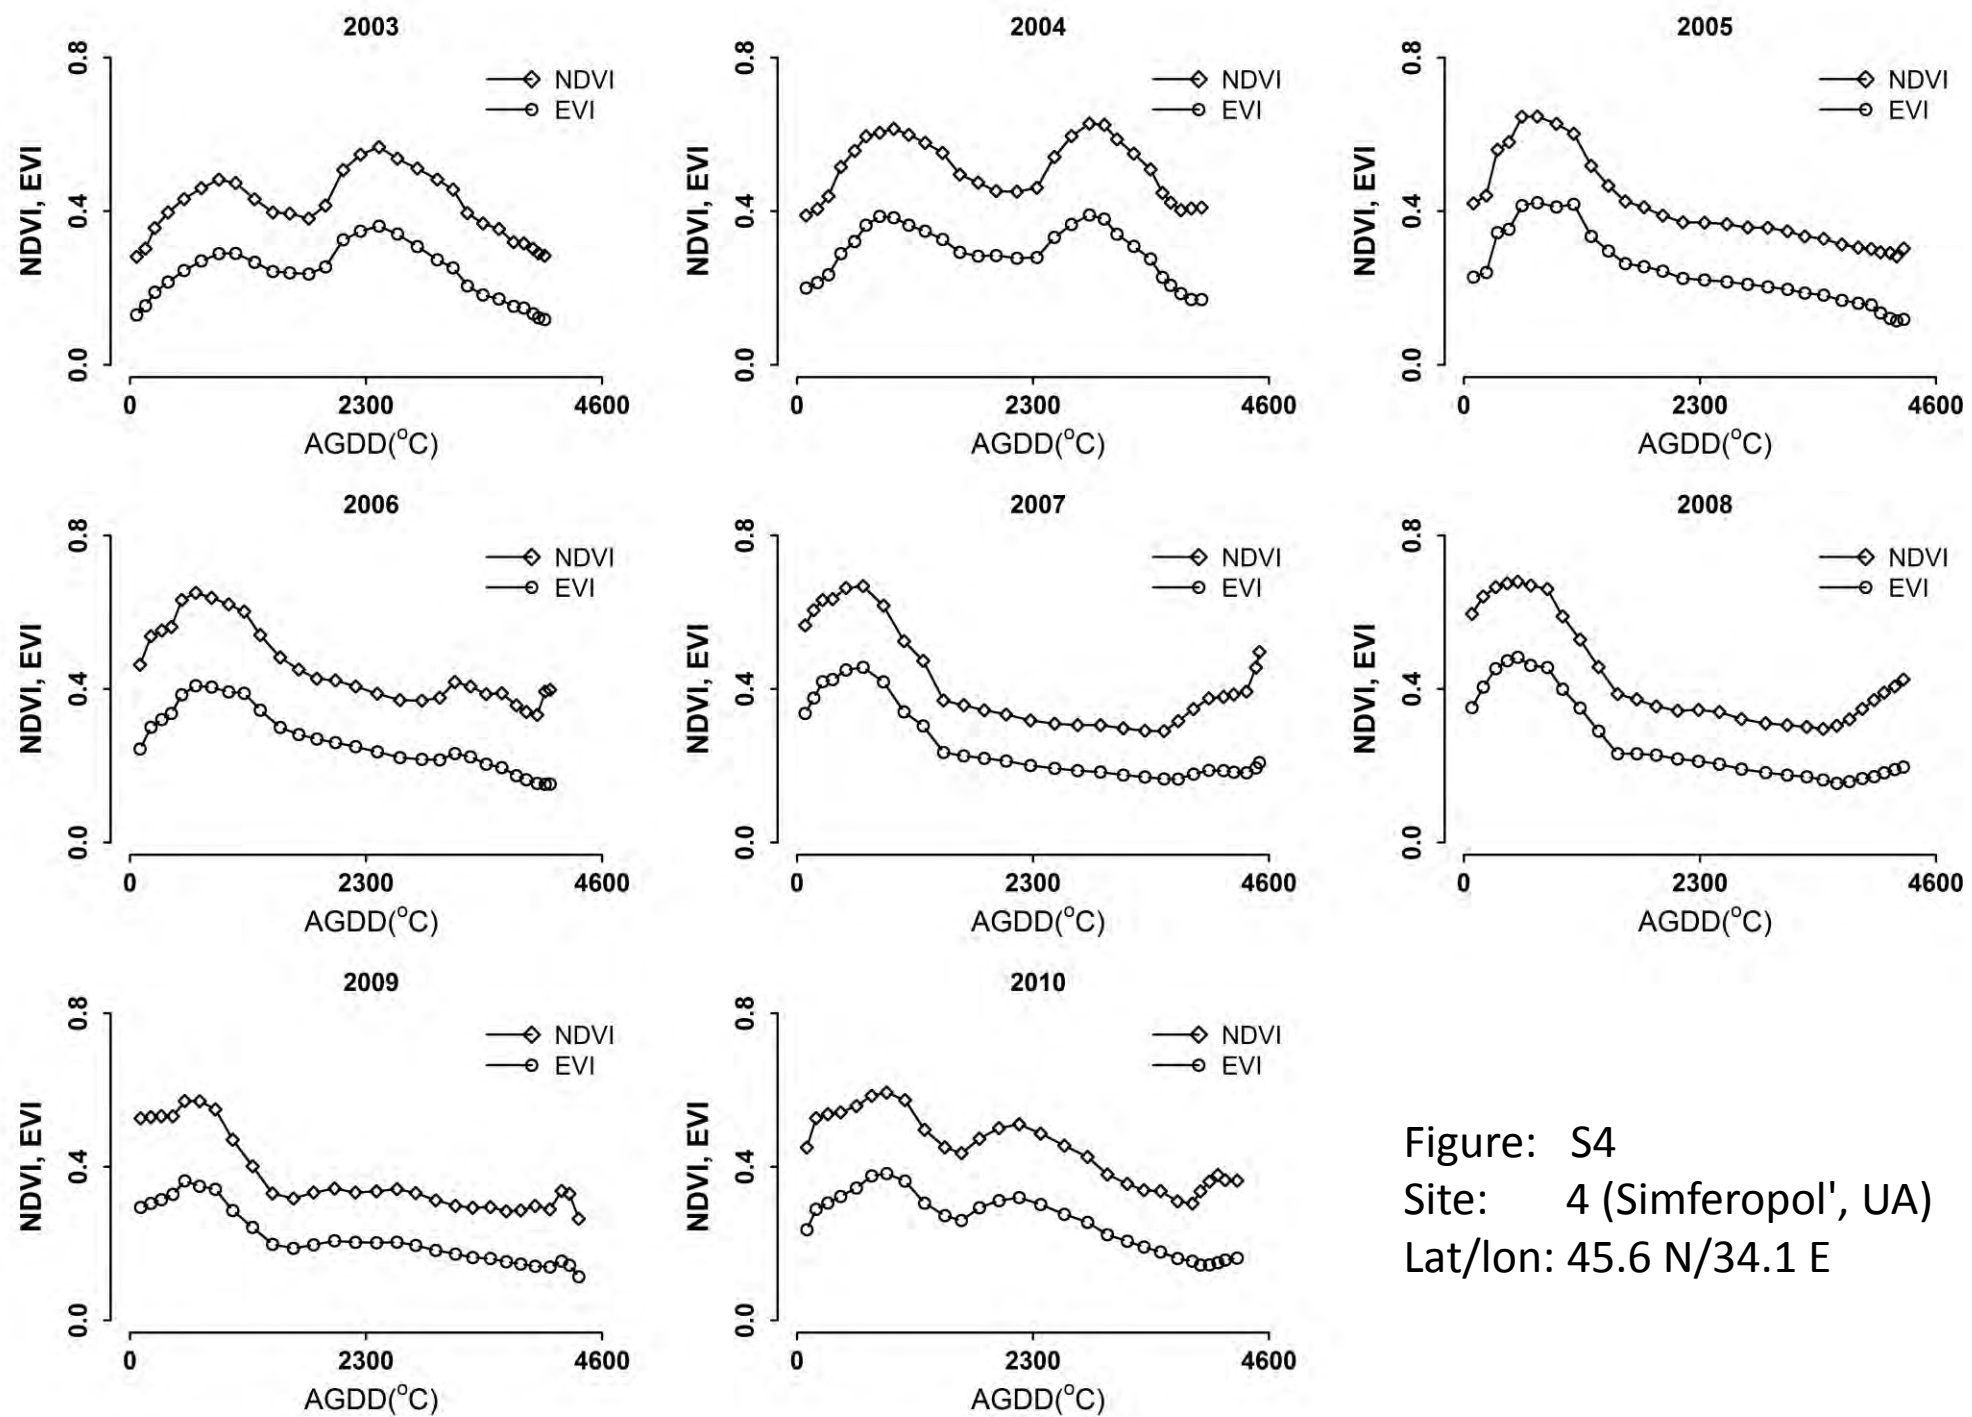

Figure: S4  
Site: 4 (Simferopol', UA)  
Lat/Ion: 45.6 N/34.1 E

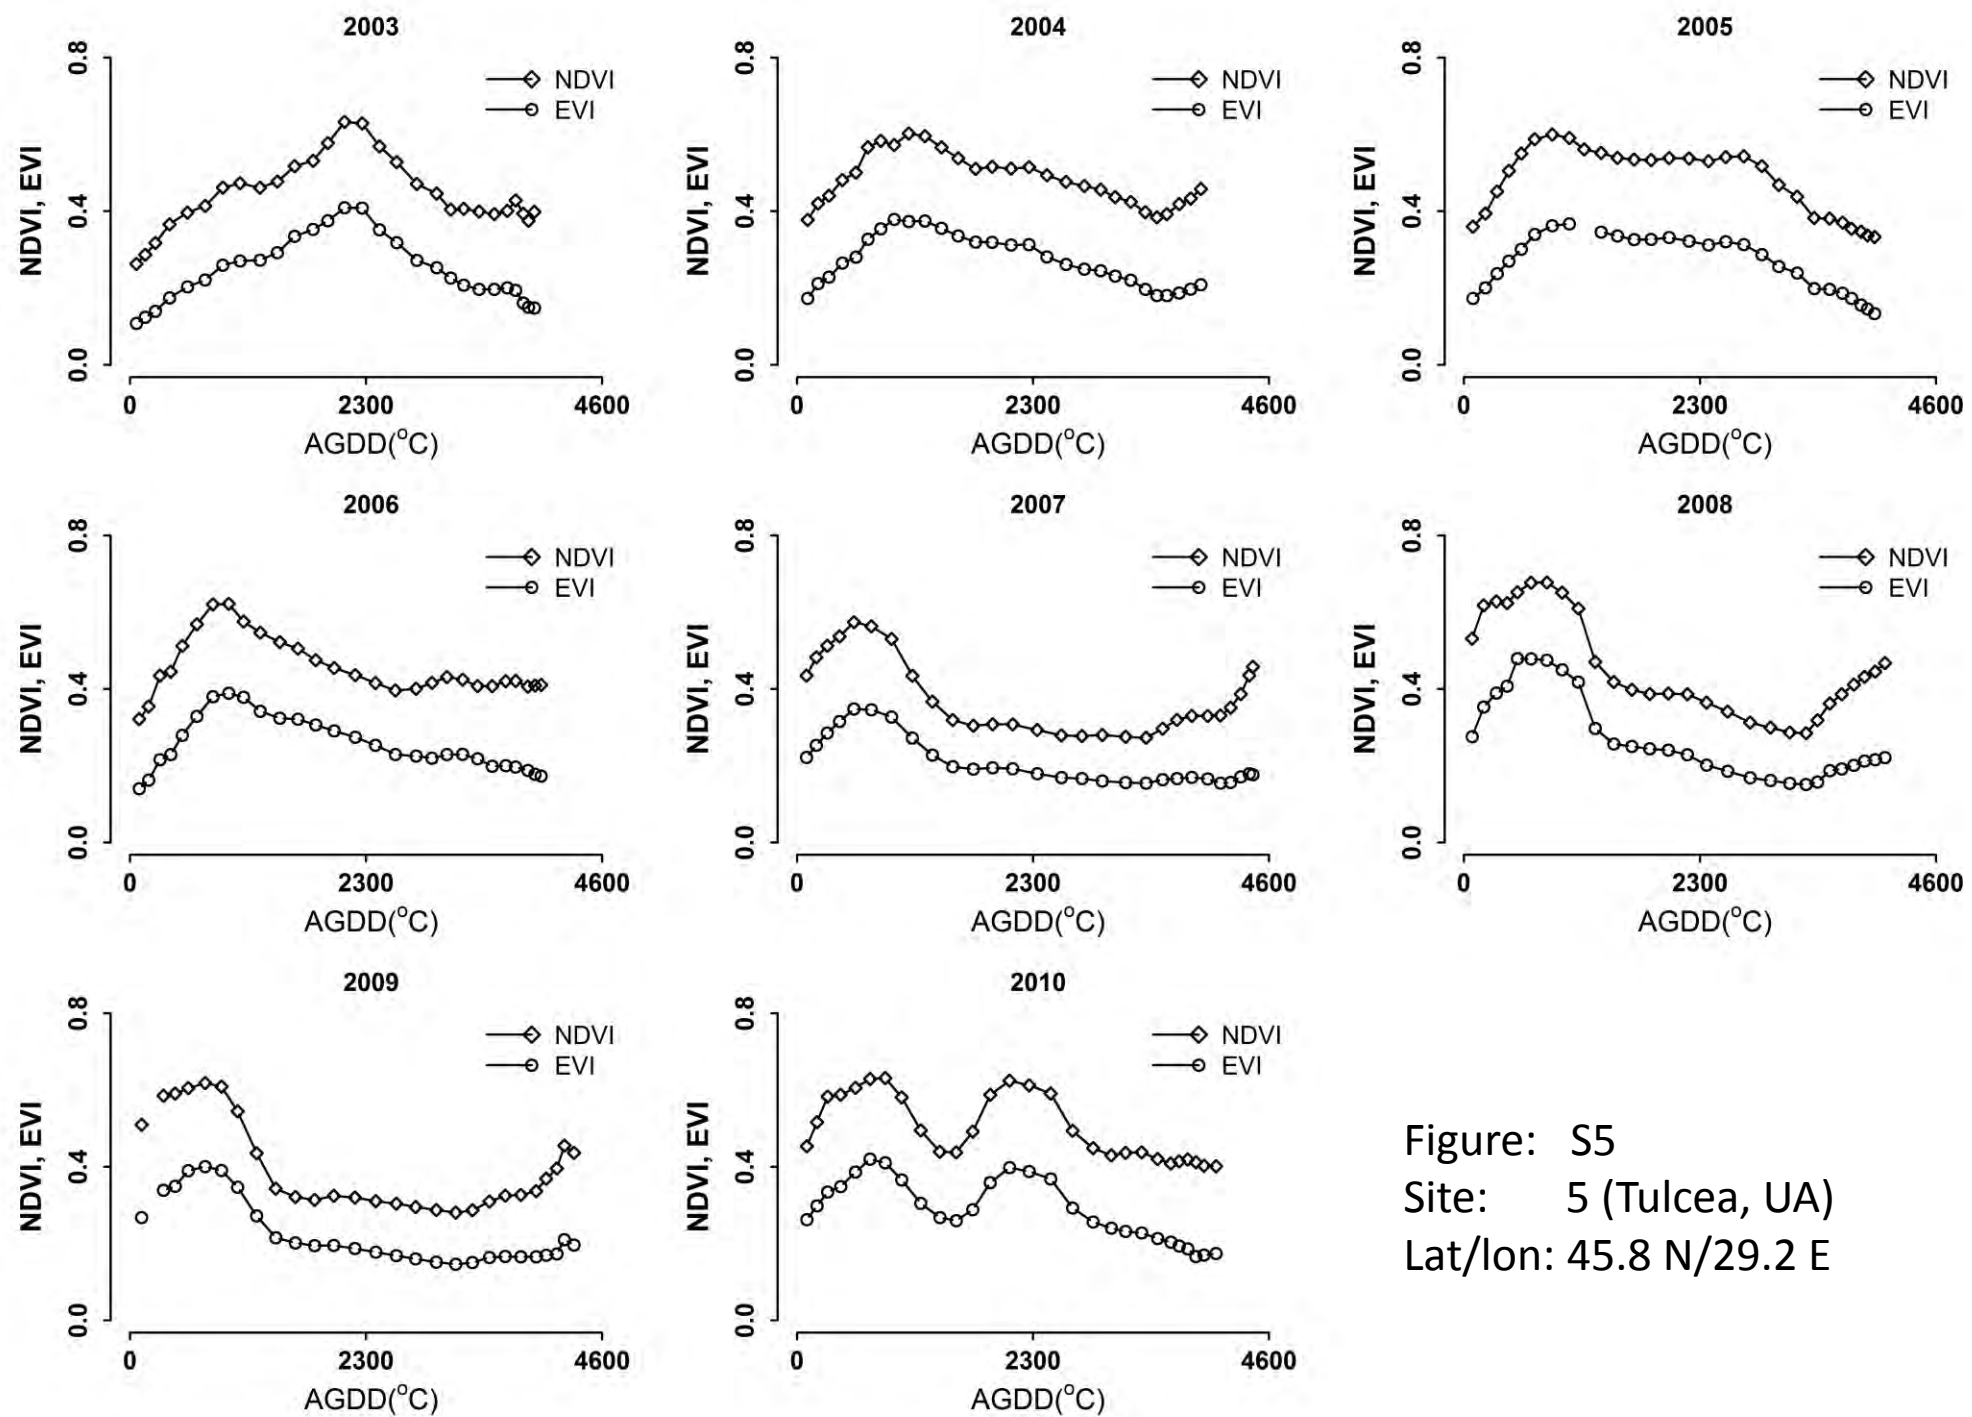

Figure: S5  
 Site: 5 (Tulcea, UA)  
 Lat/Ion: 45.8 N/29.2 E

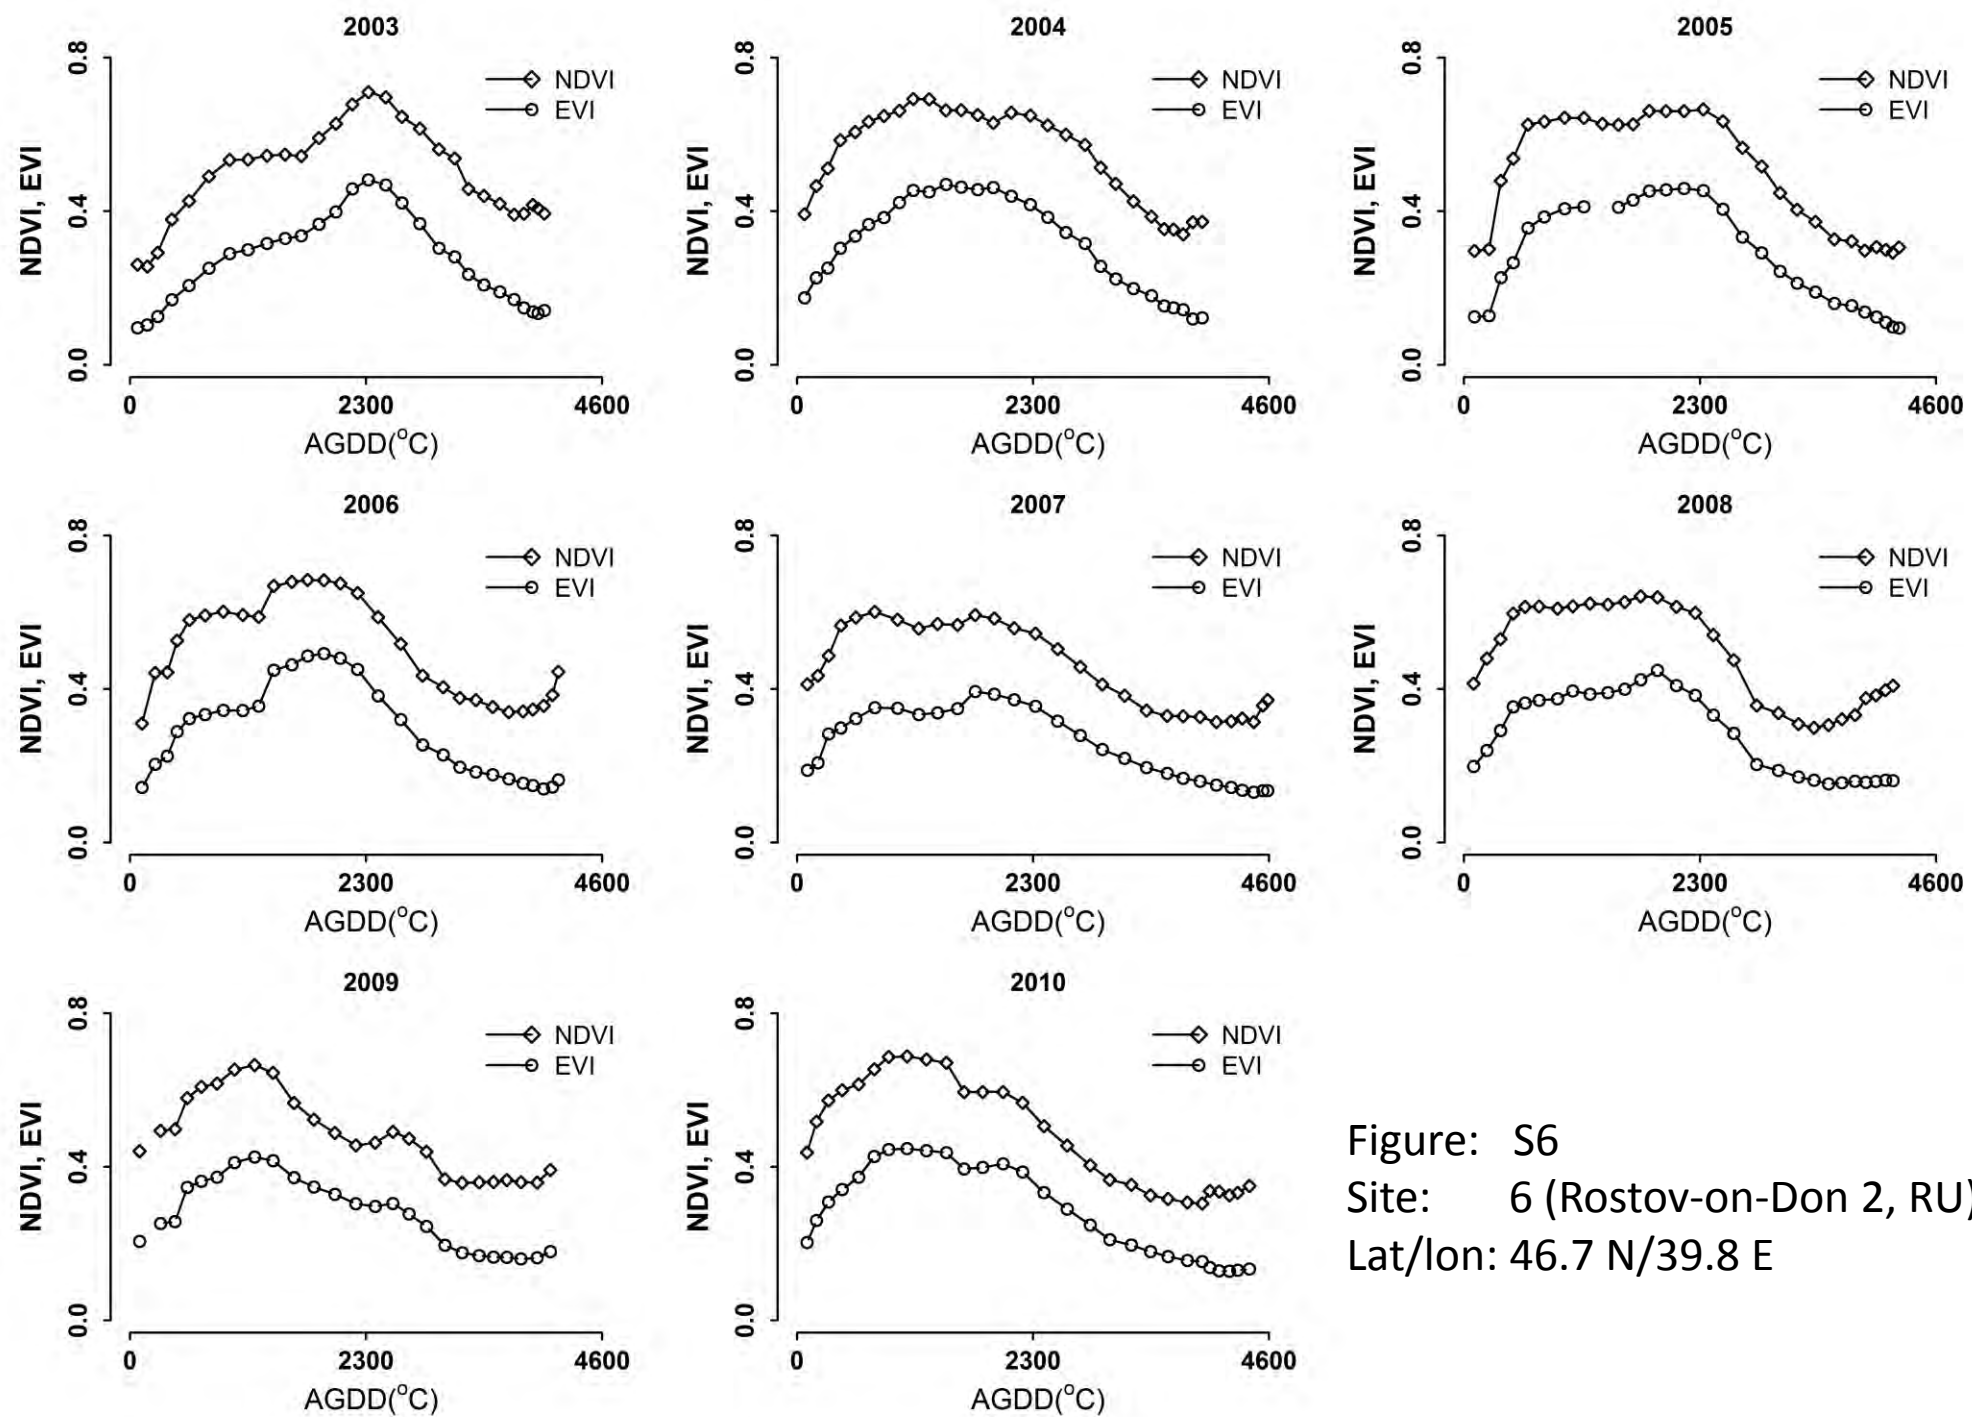

Figure: S6  
Site: 6 (Rostov-on-Don 2, RU)  
Lat/lon: 46.7 N/39.8 E

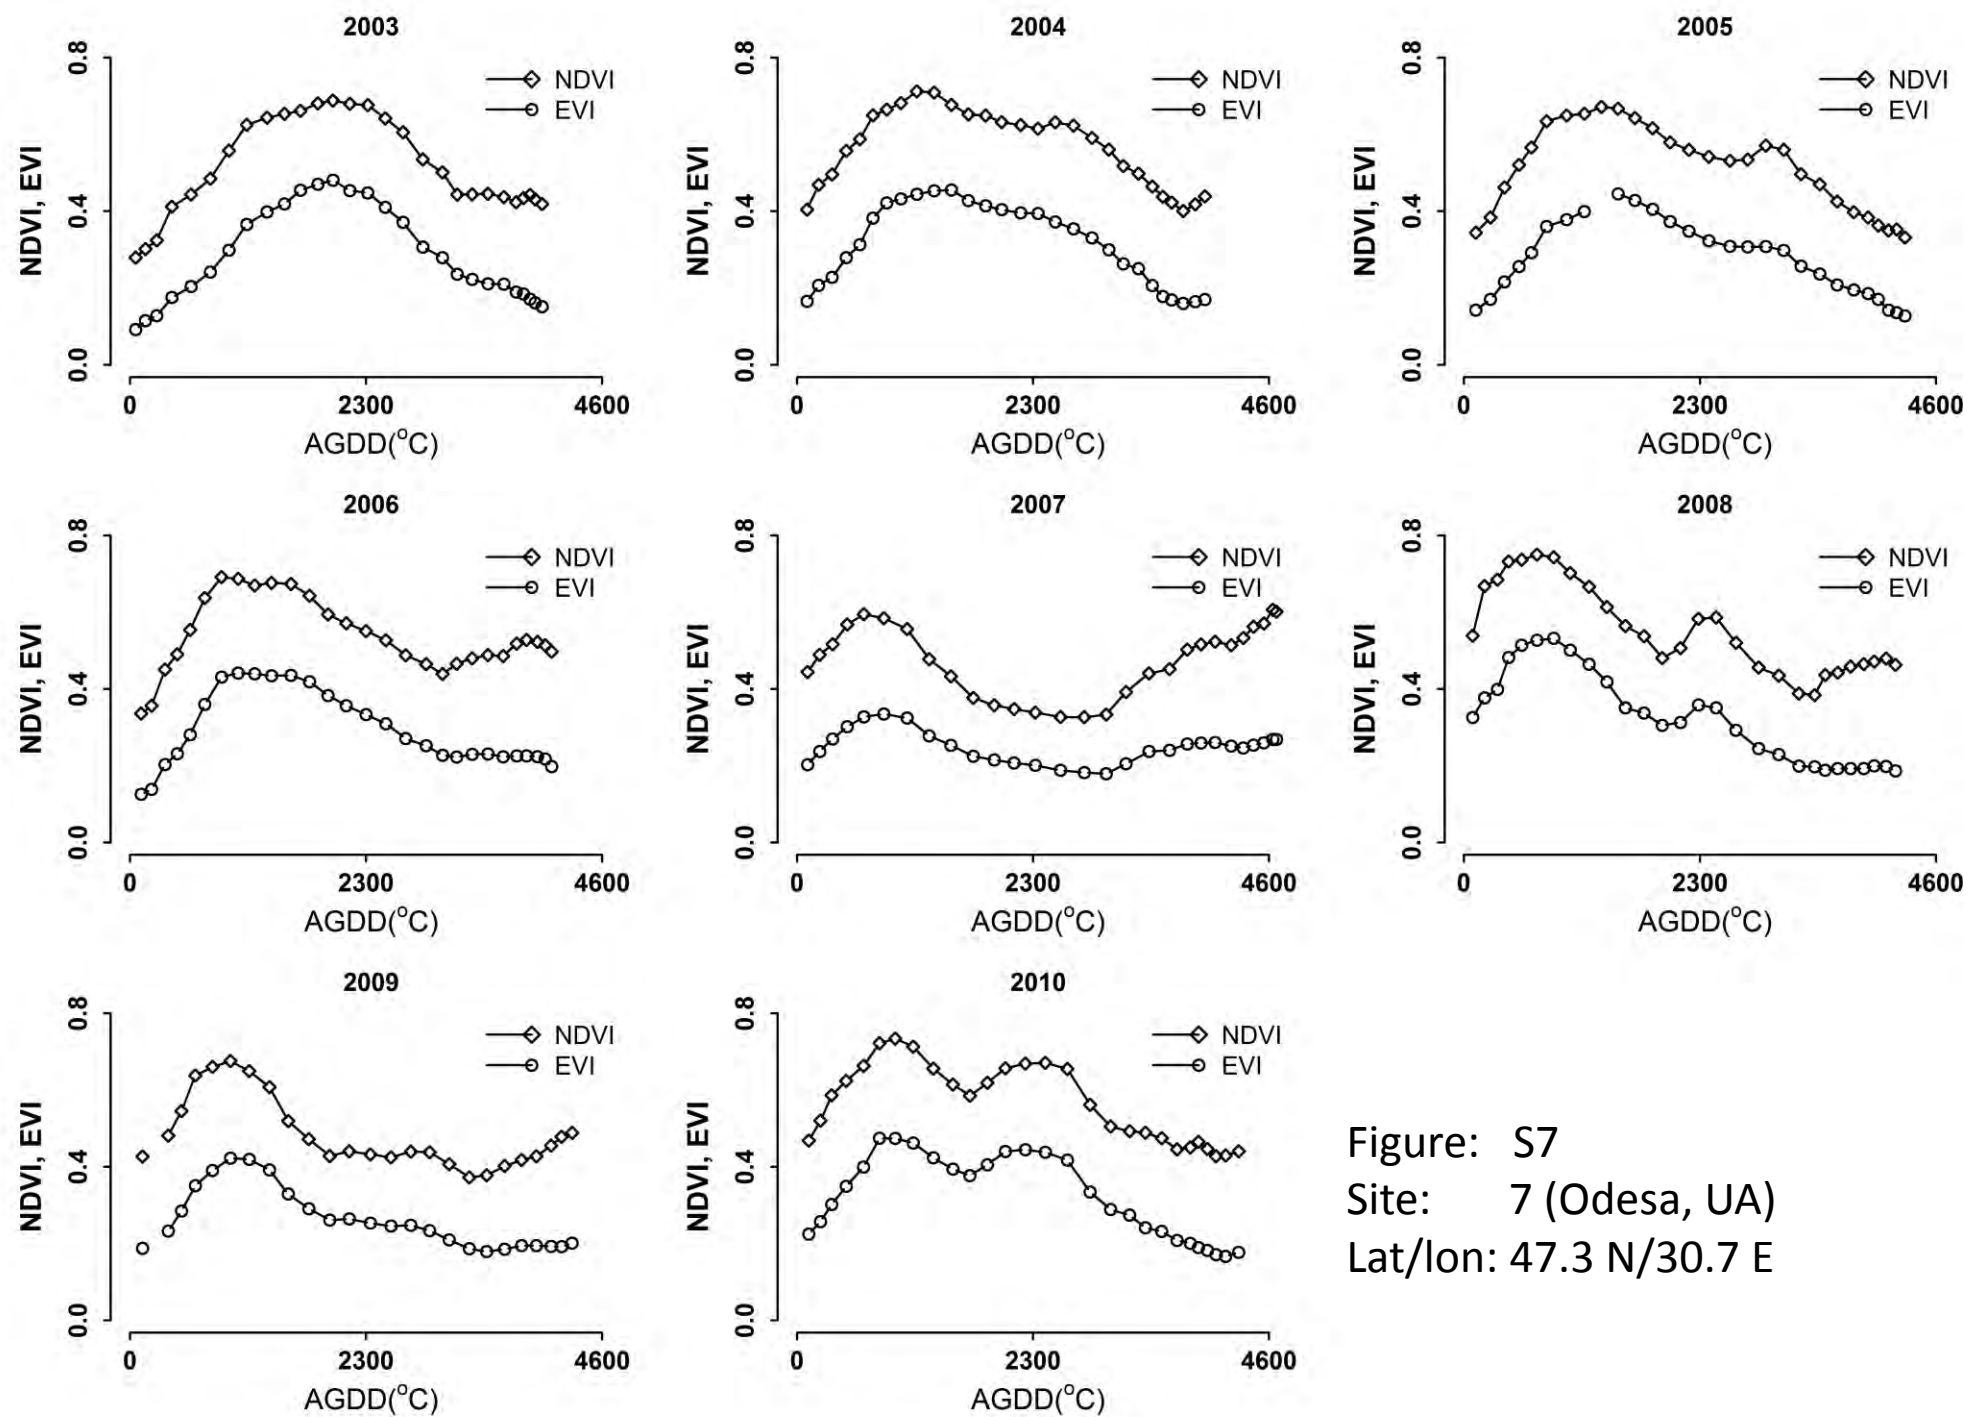

Figure: S7  
Site: 7 (Odesa, UA)  
Lat/lon: 47.3 N/30.7 E



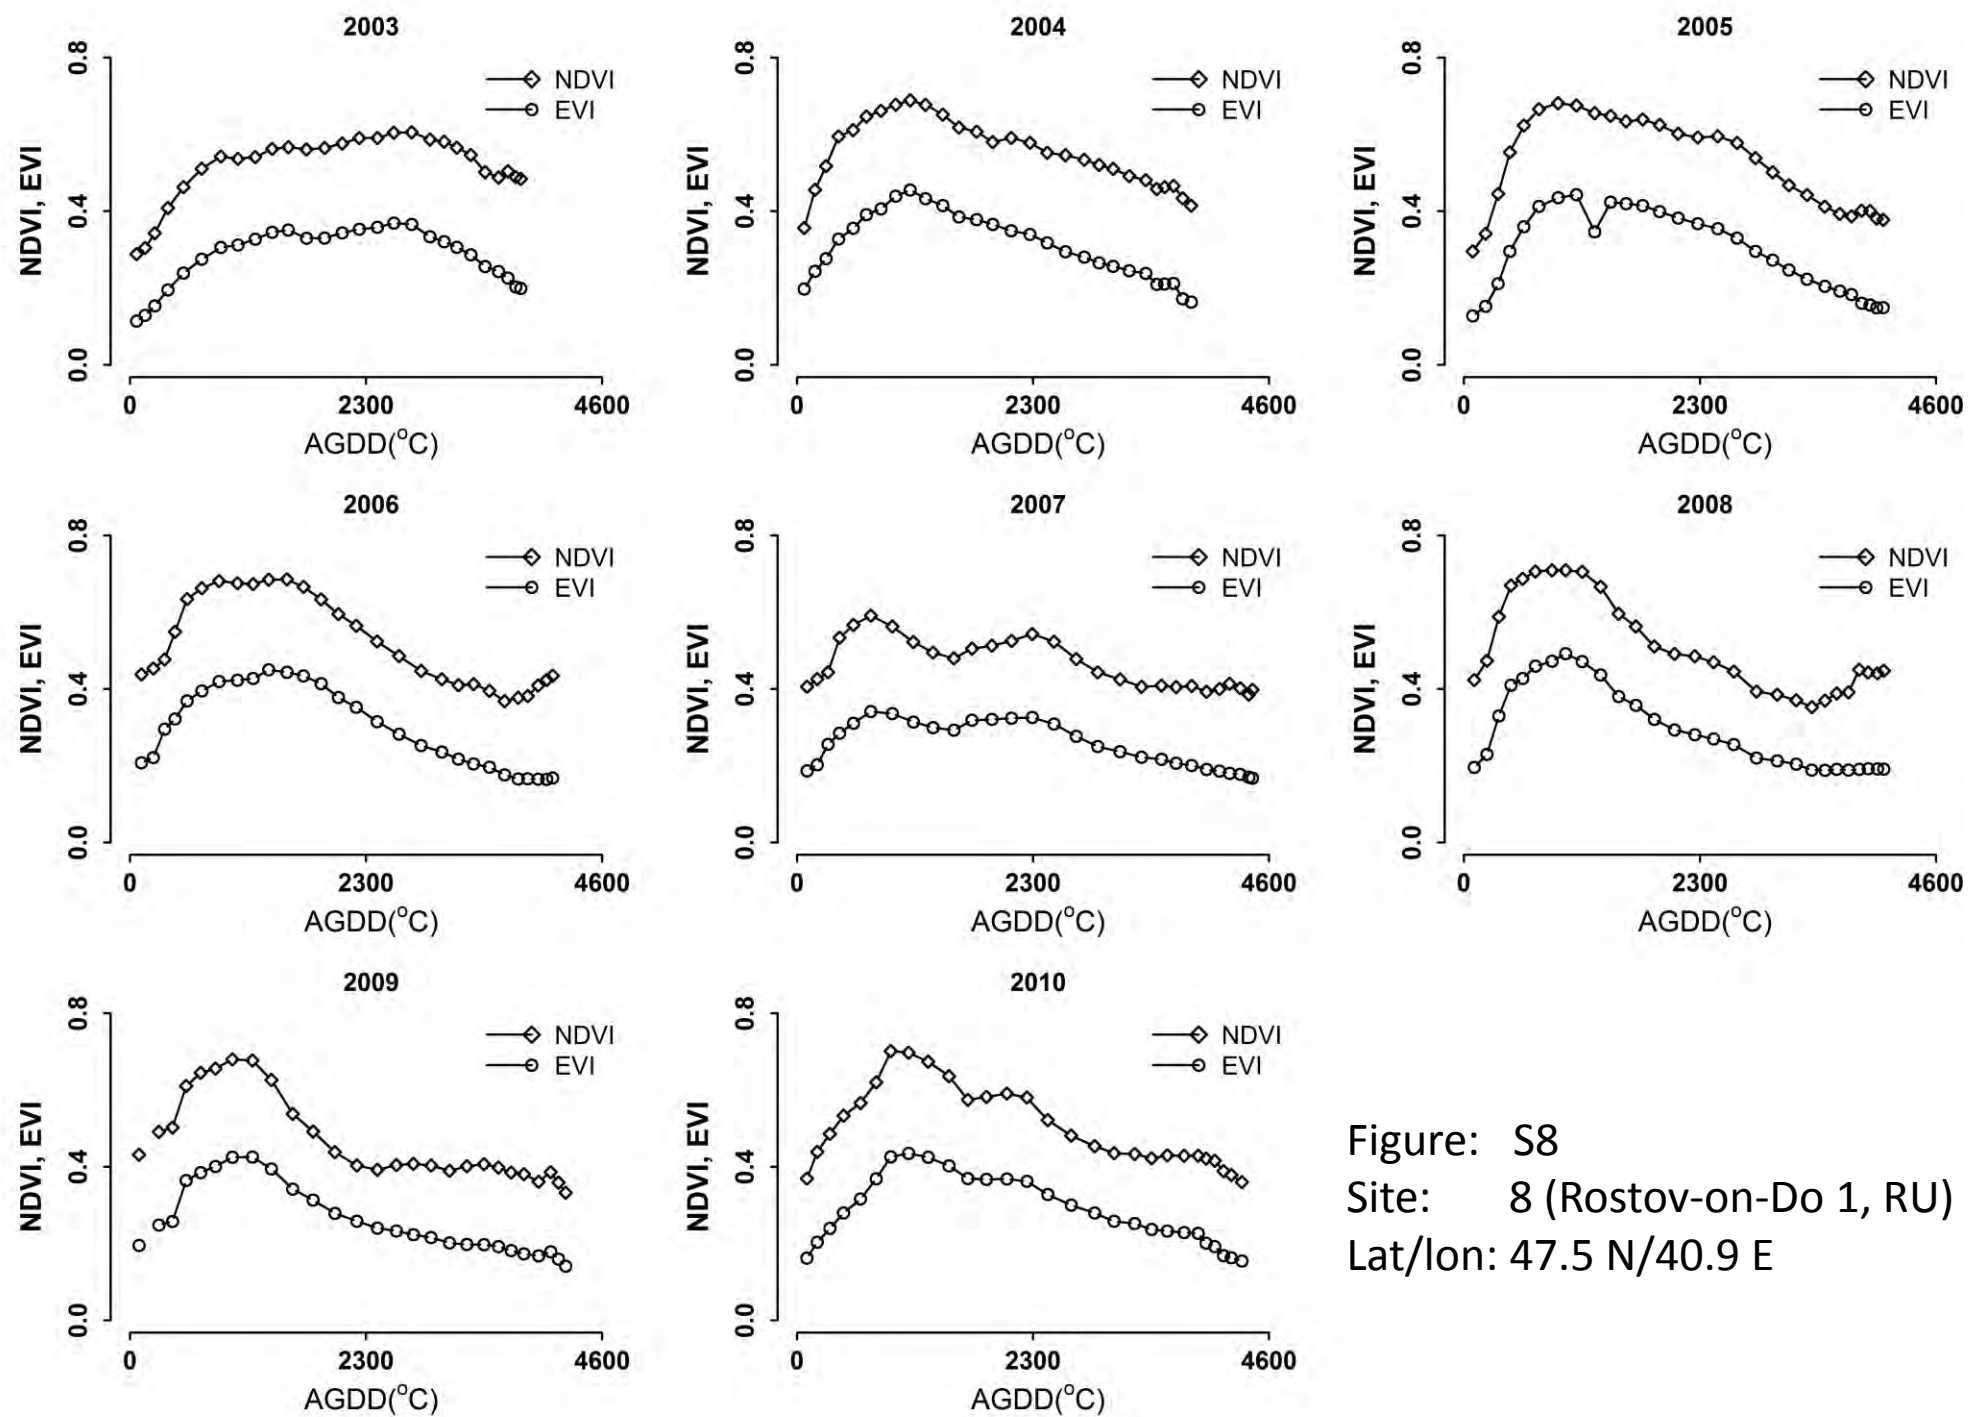

Figure: S8  
Site: 8 (Rostov-on-Do 1, RU)  
Lat/lon: 47.5 N/40.9 E



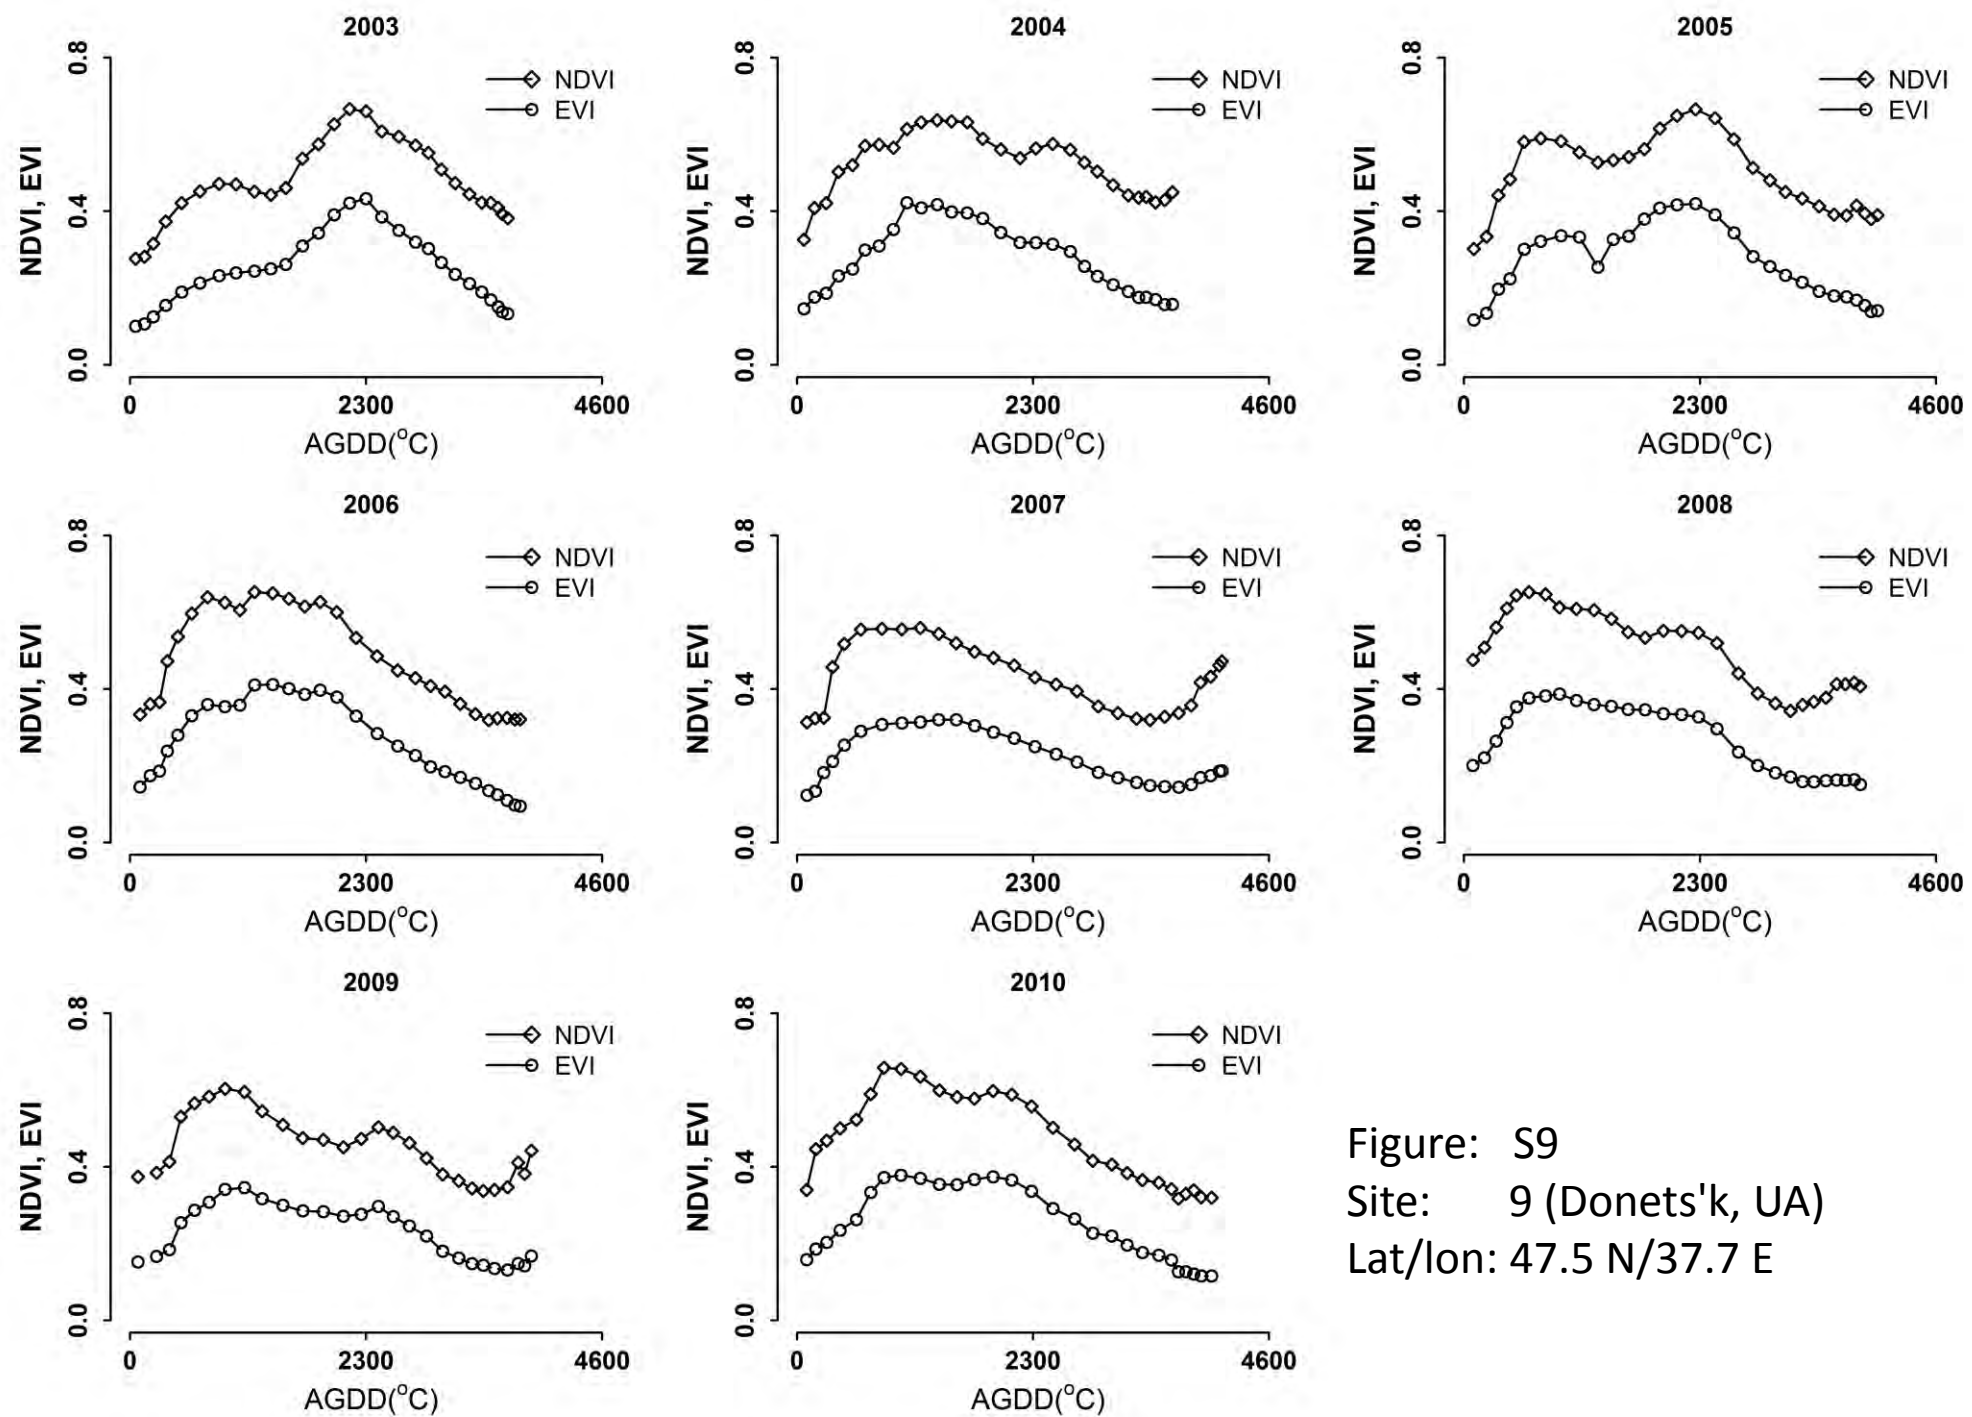

Figure: S9  
Site: 9 (Donets'k, UA)  
Lat/lon: 47.5 N/37.7 E

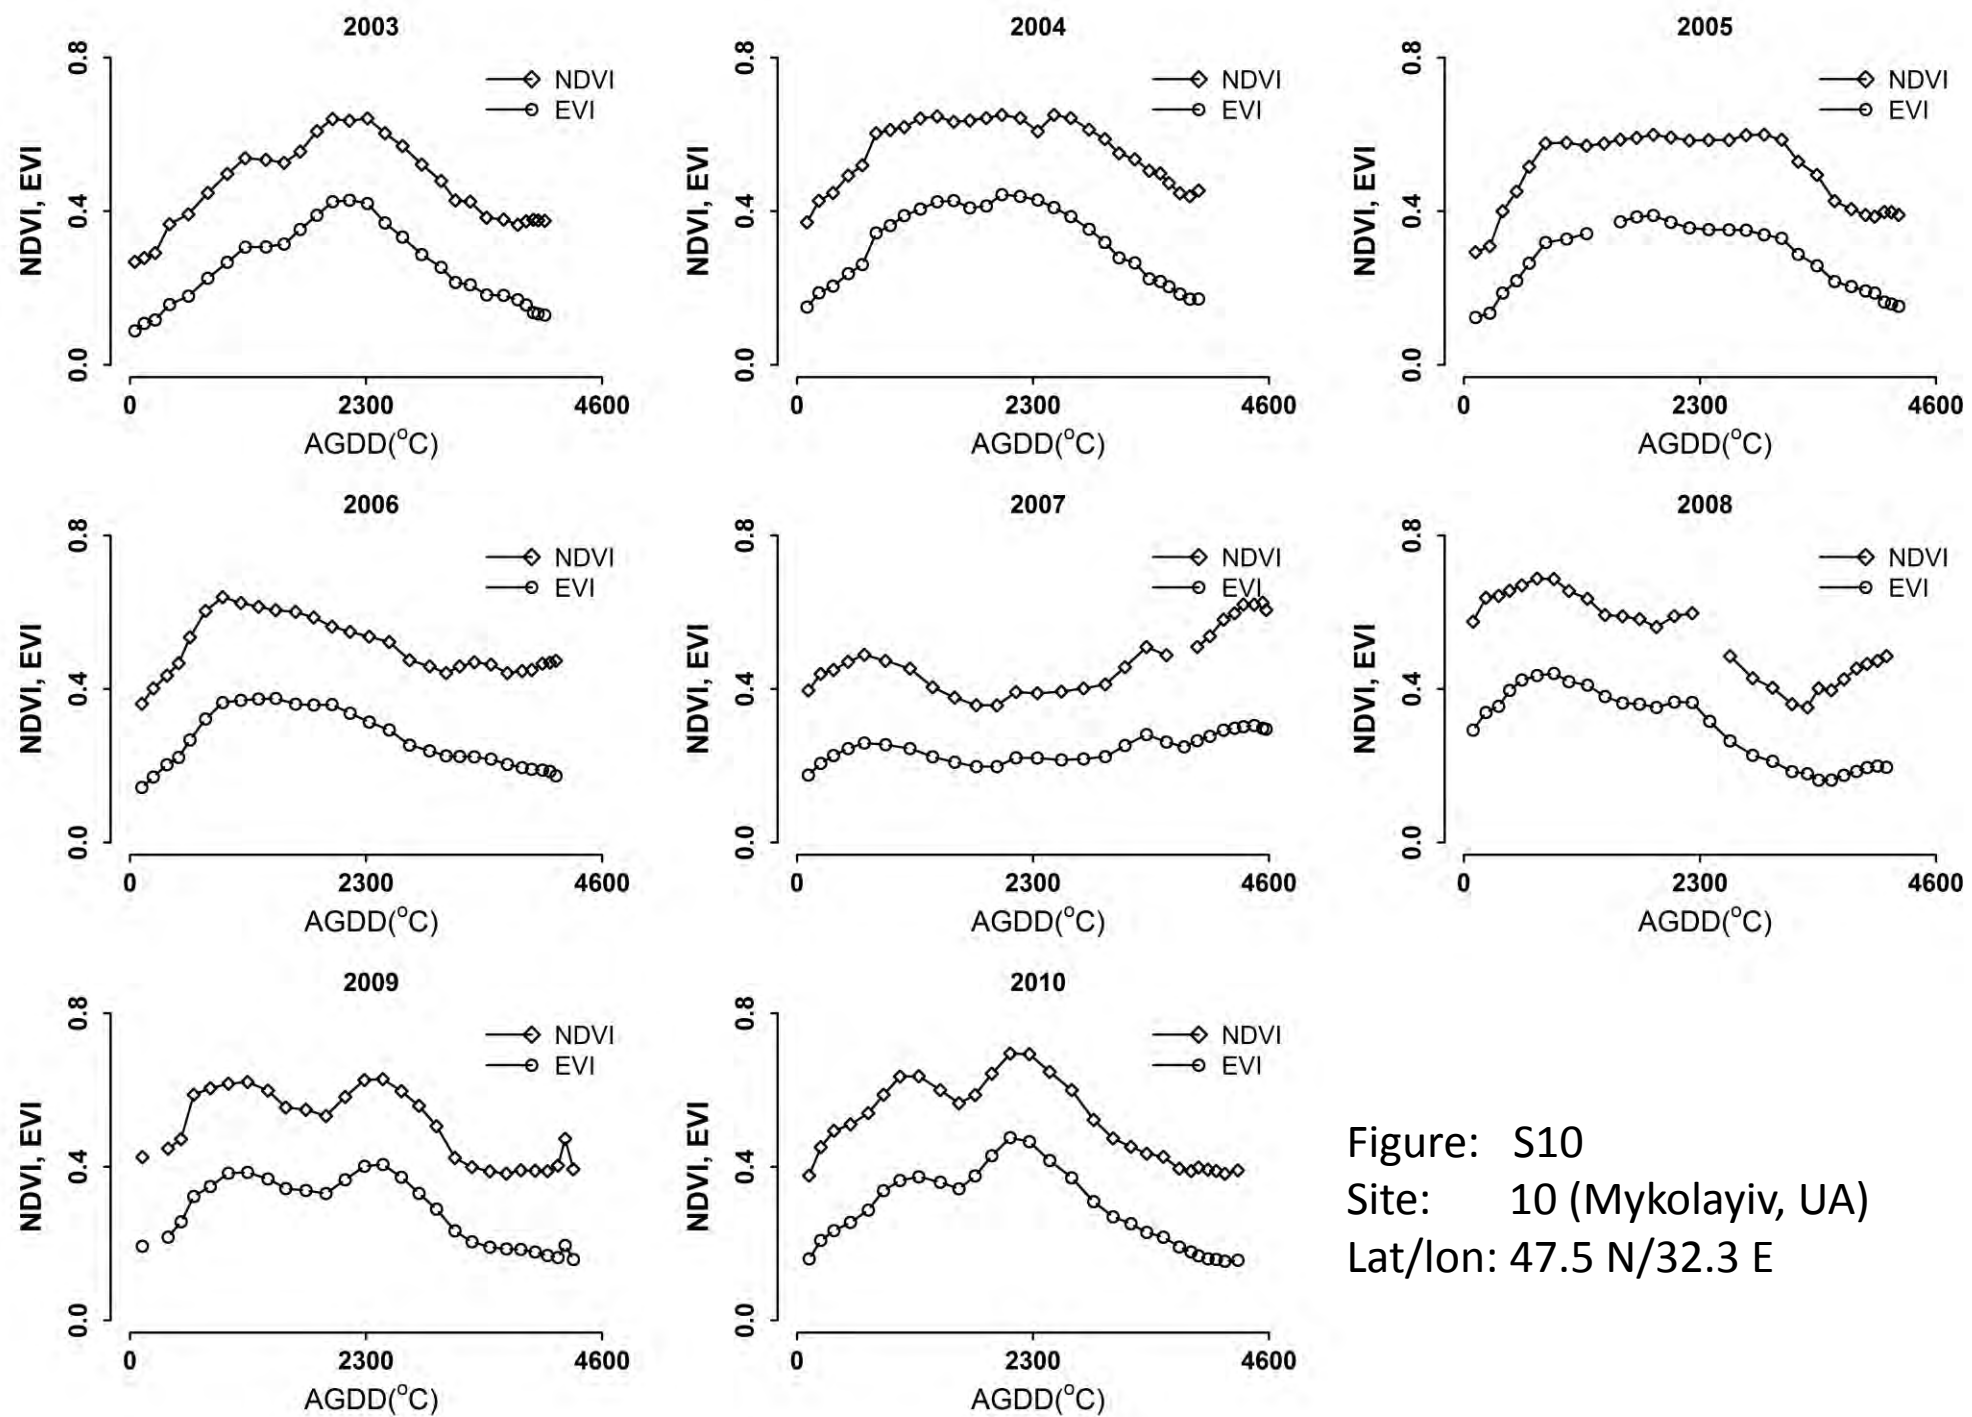

Figure: S10  
Site: 10 (Mykolayiv, UA)  
Lat/Ion: 47.5 N/32.3 E

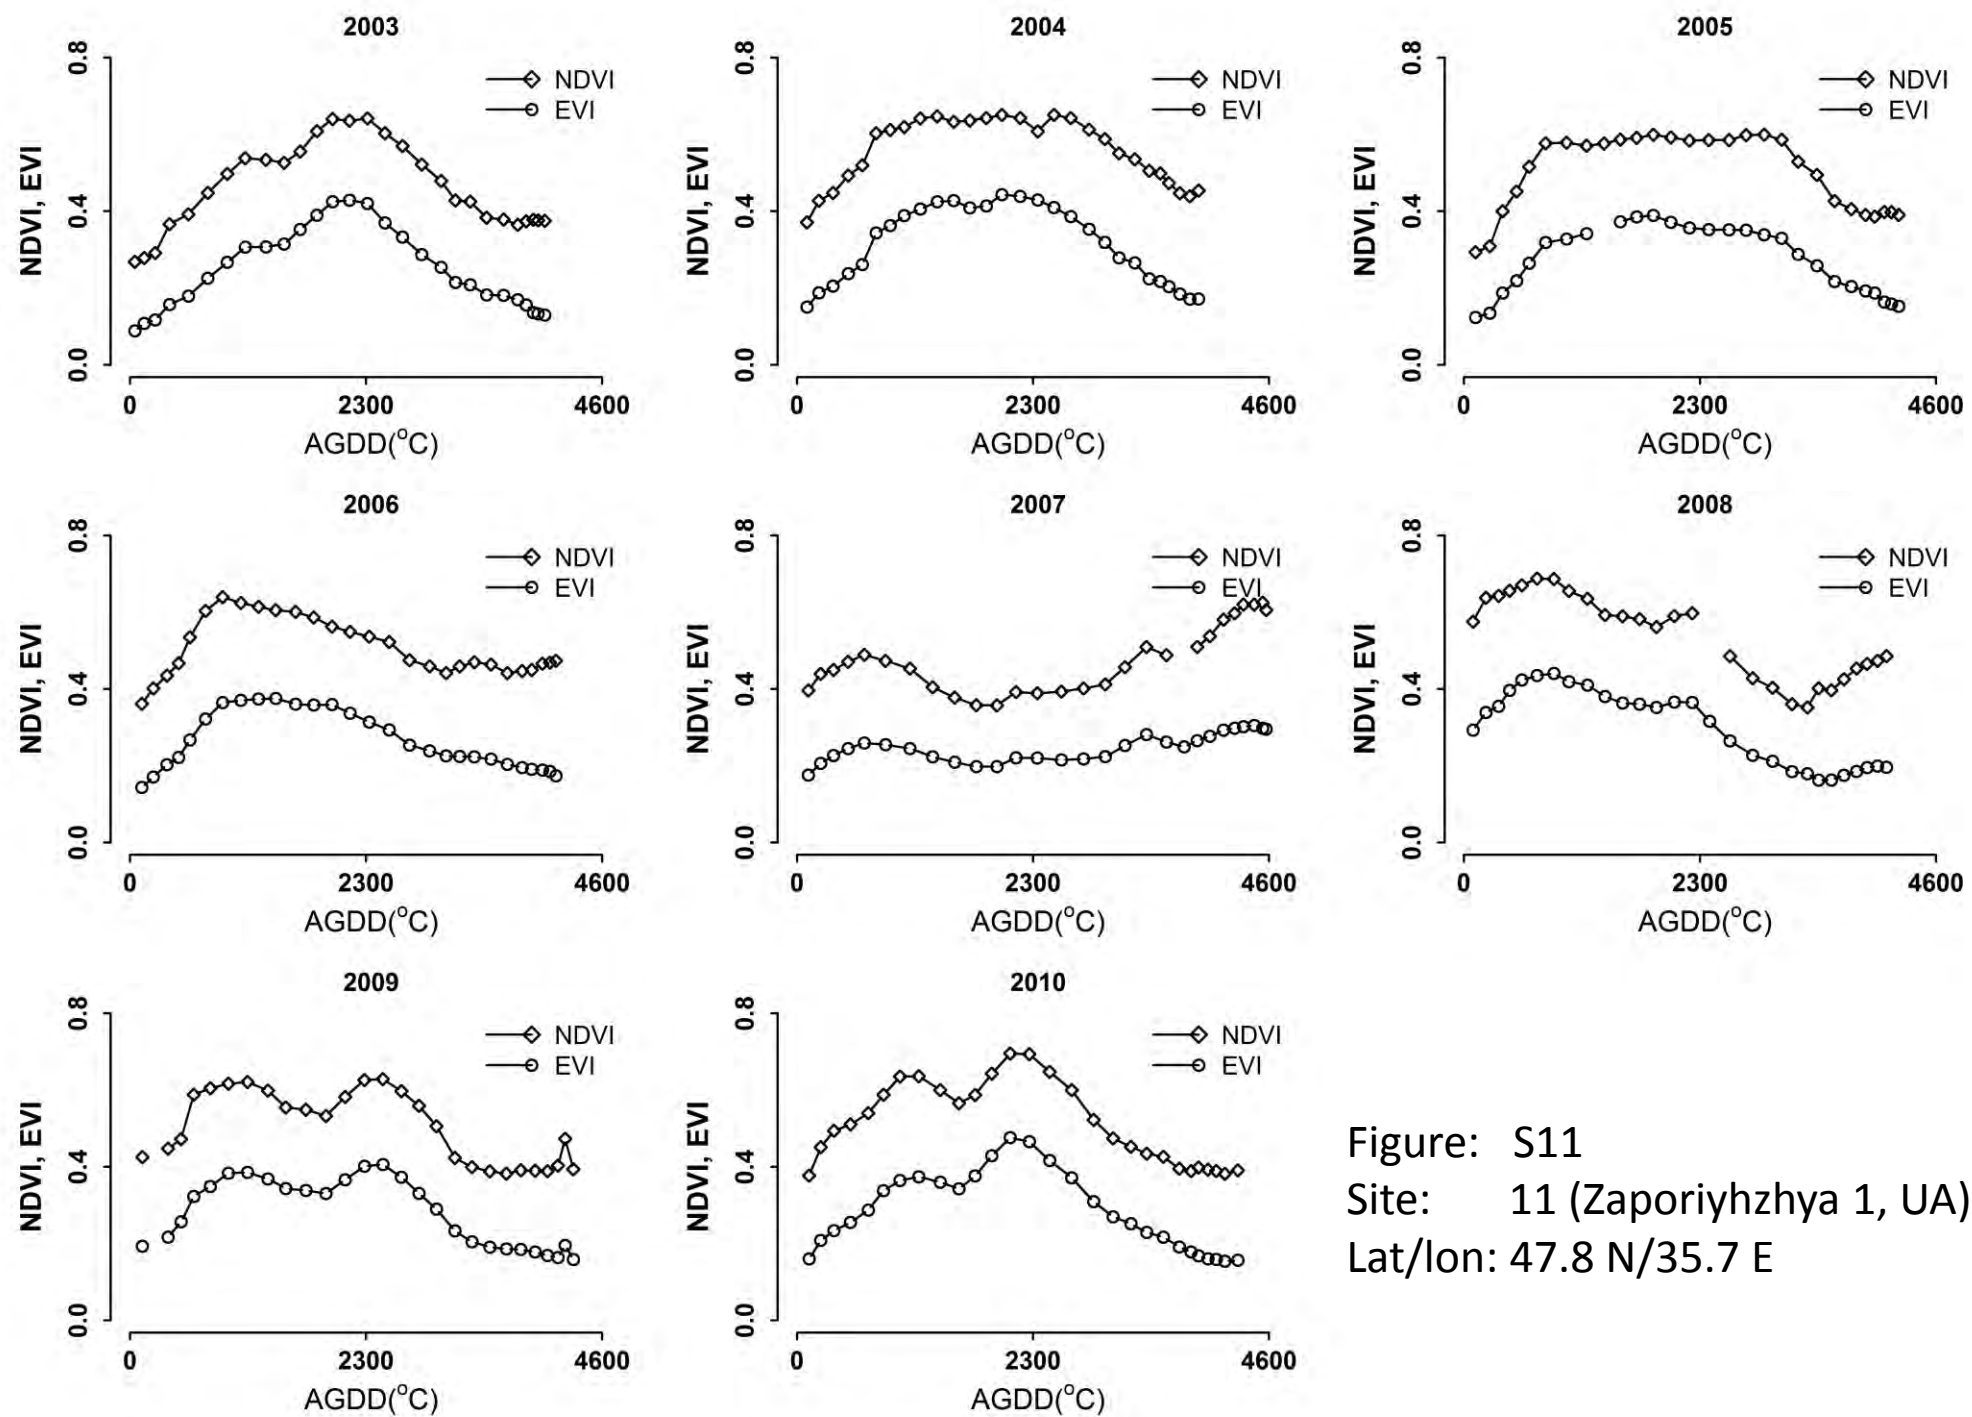

Figure: S11  
Site: 11 (Zaporiyhzhya 1, UA)  
Lat/Ion: 47.8 N/35.7 E

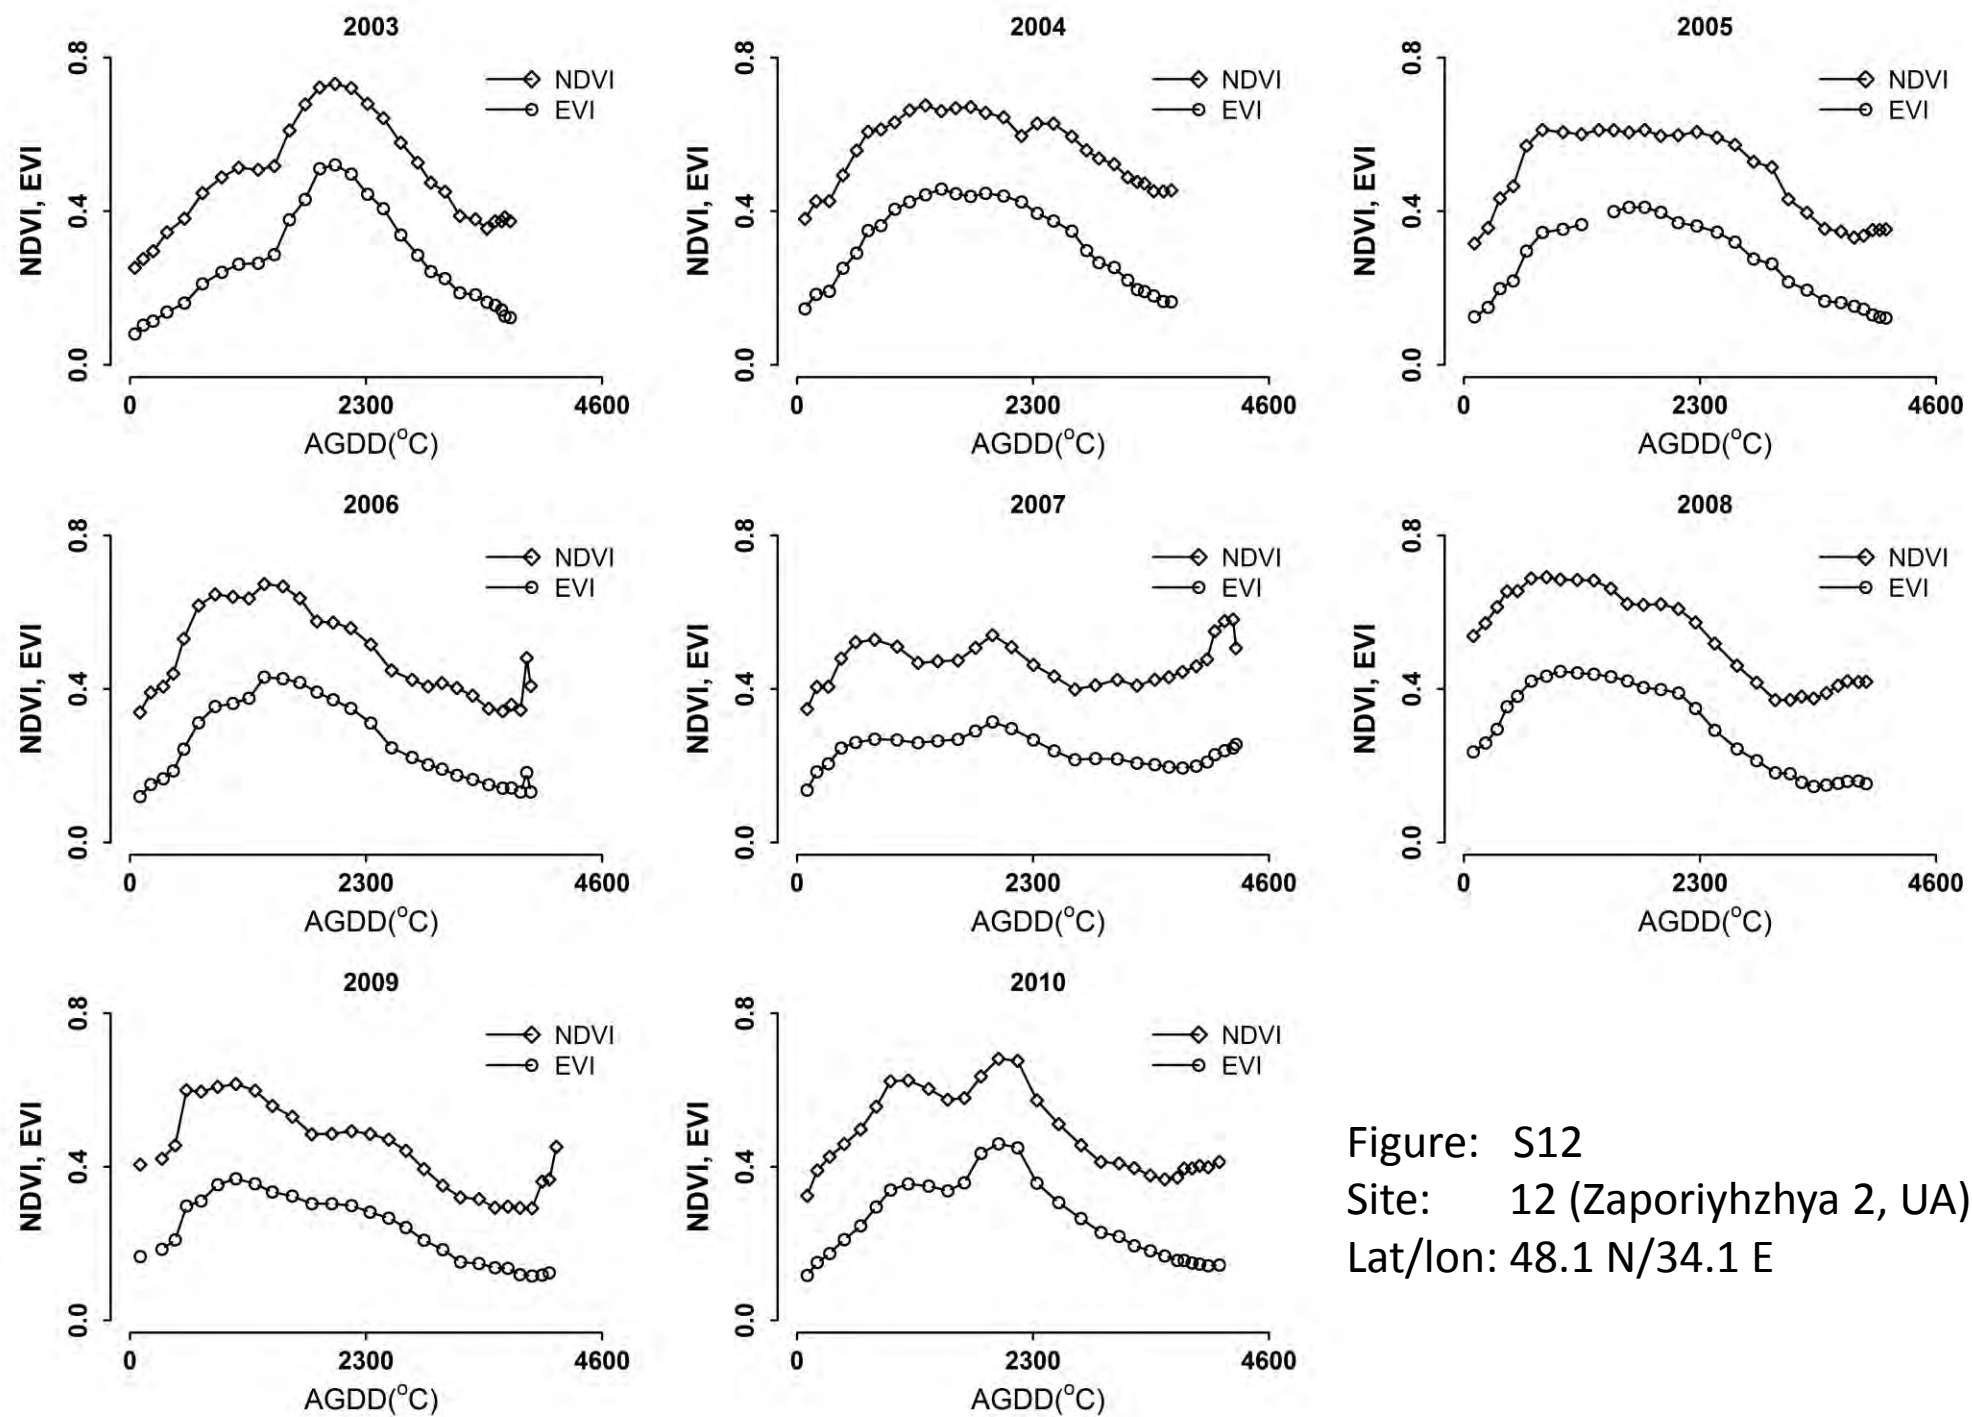

Figure: S12  
Site: 12 (Zaporiyhzhya 2, UA)  
Lat/Ion: 48.1 N/34.1 E

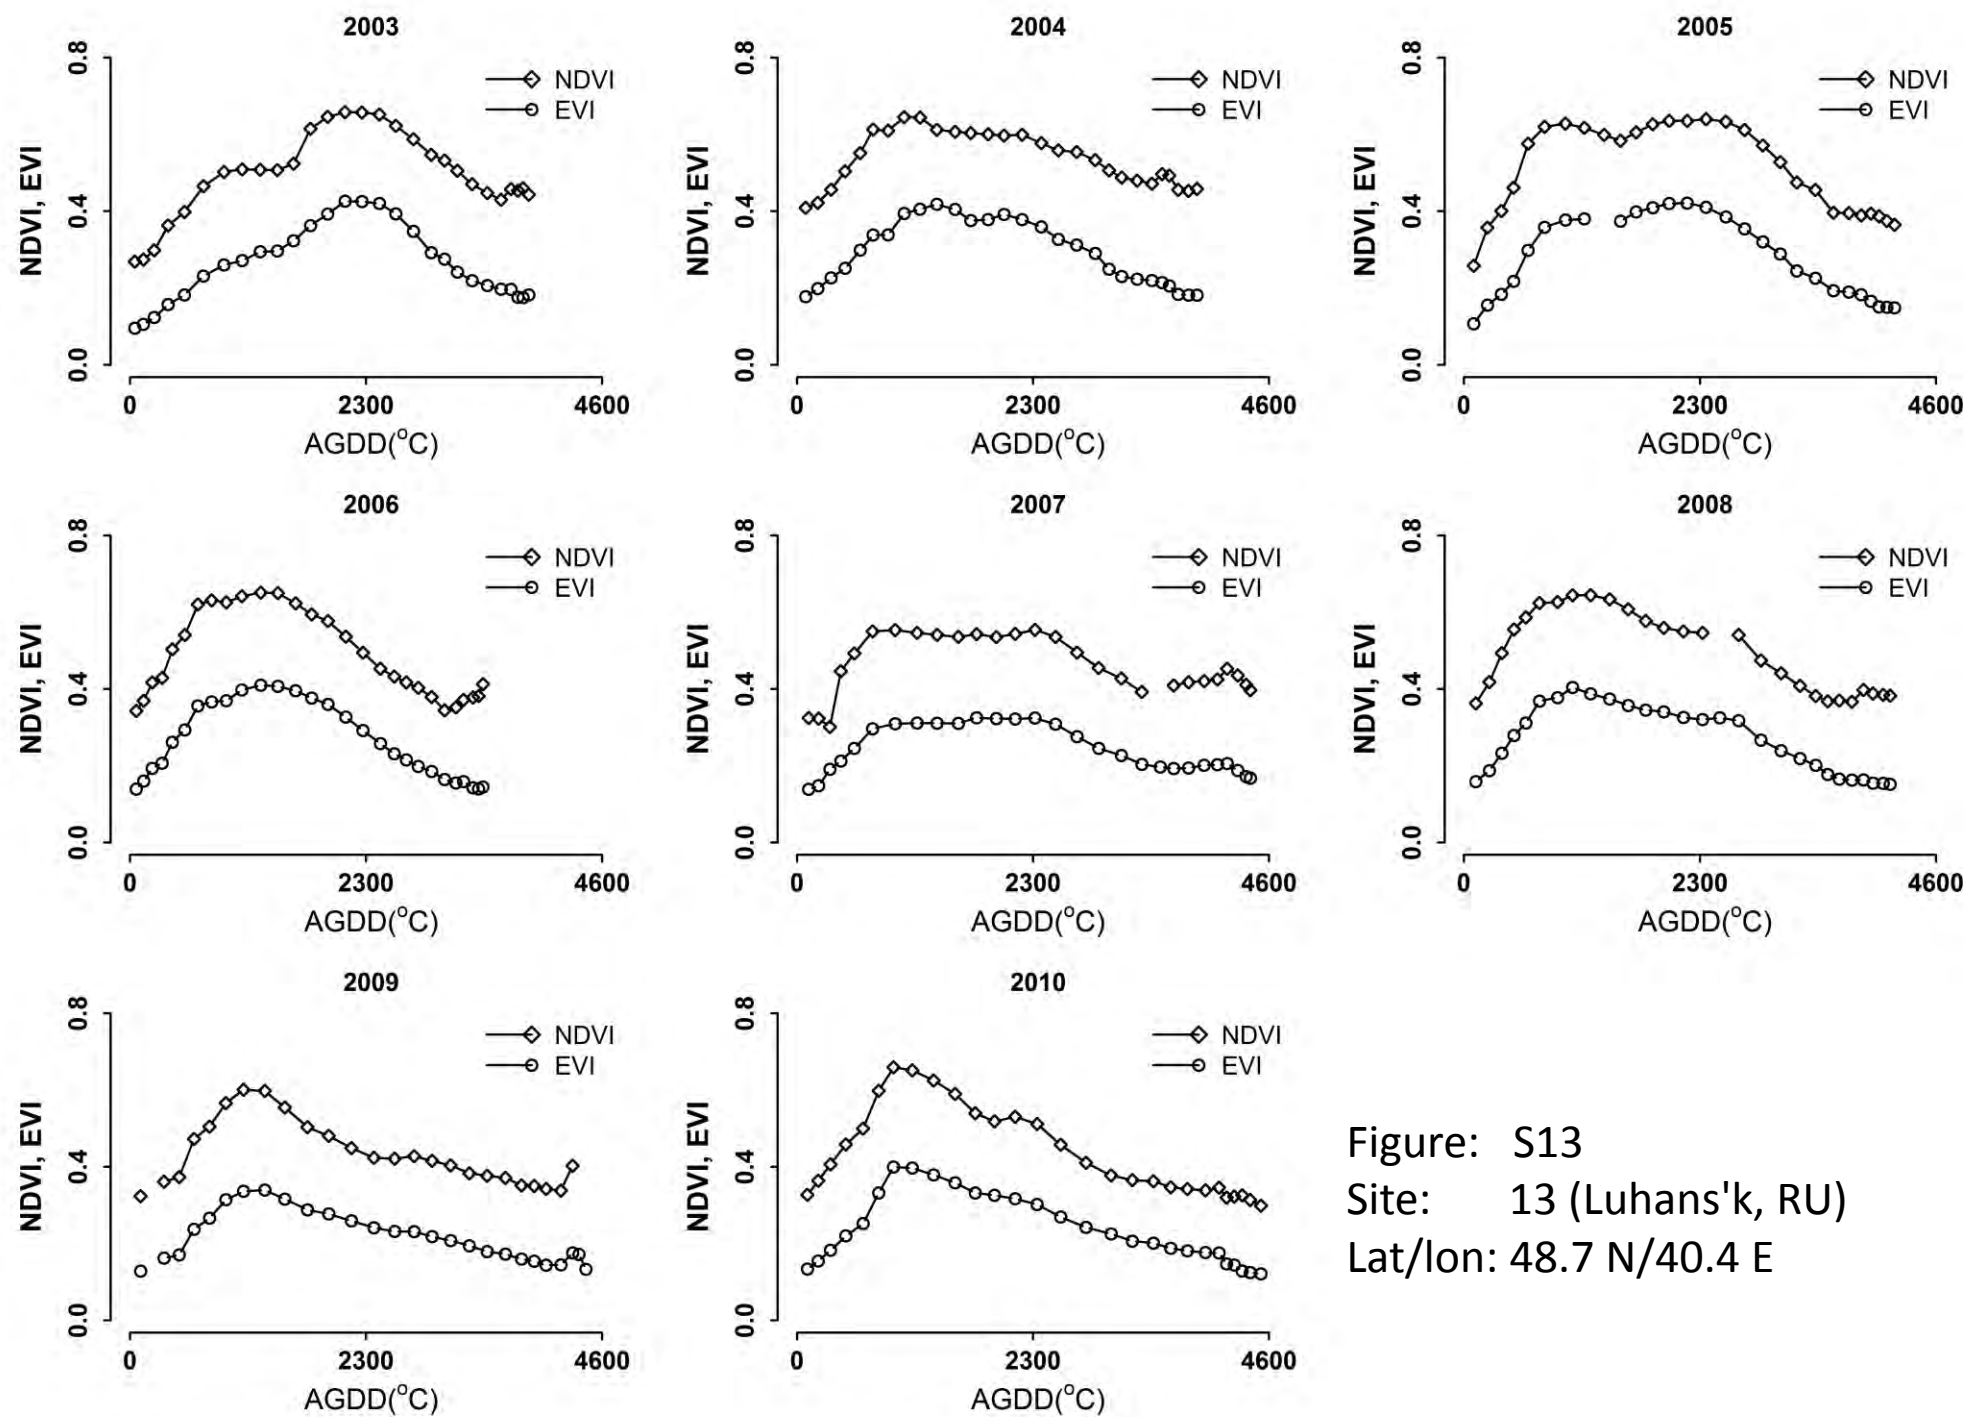

Figure: S13  
 Site: 13 (Luhans'k, RU)  
 Lat/lon: 48.7 N/40.4 E

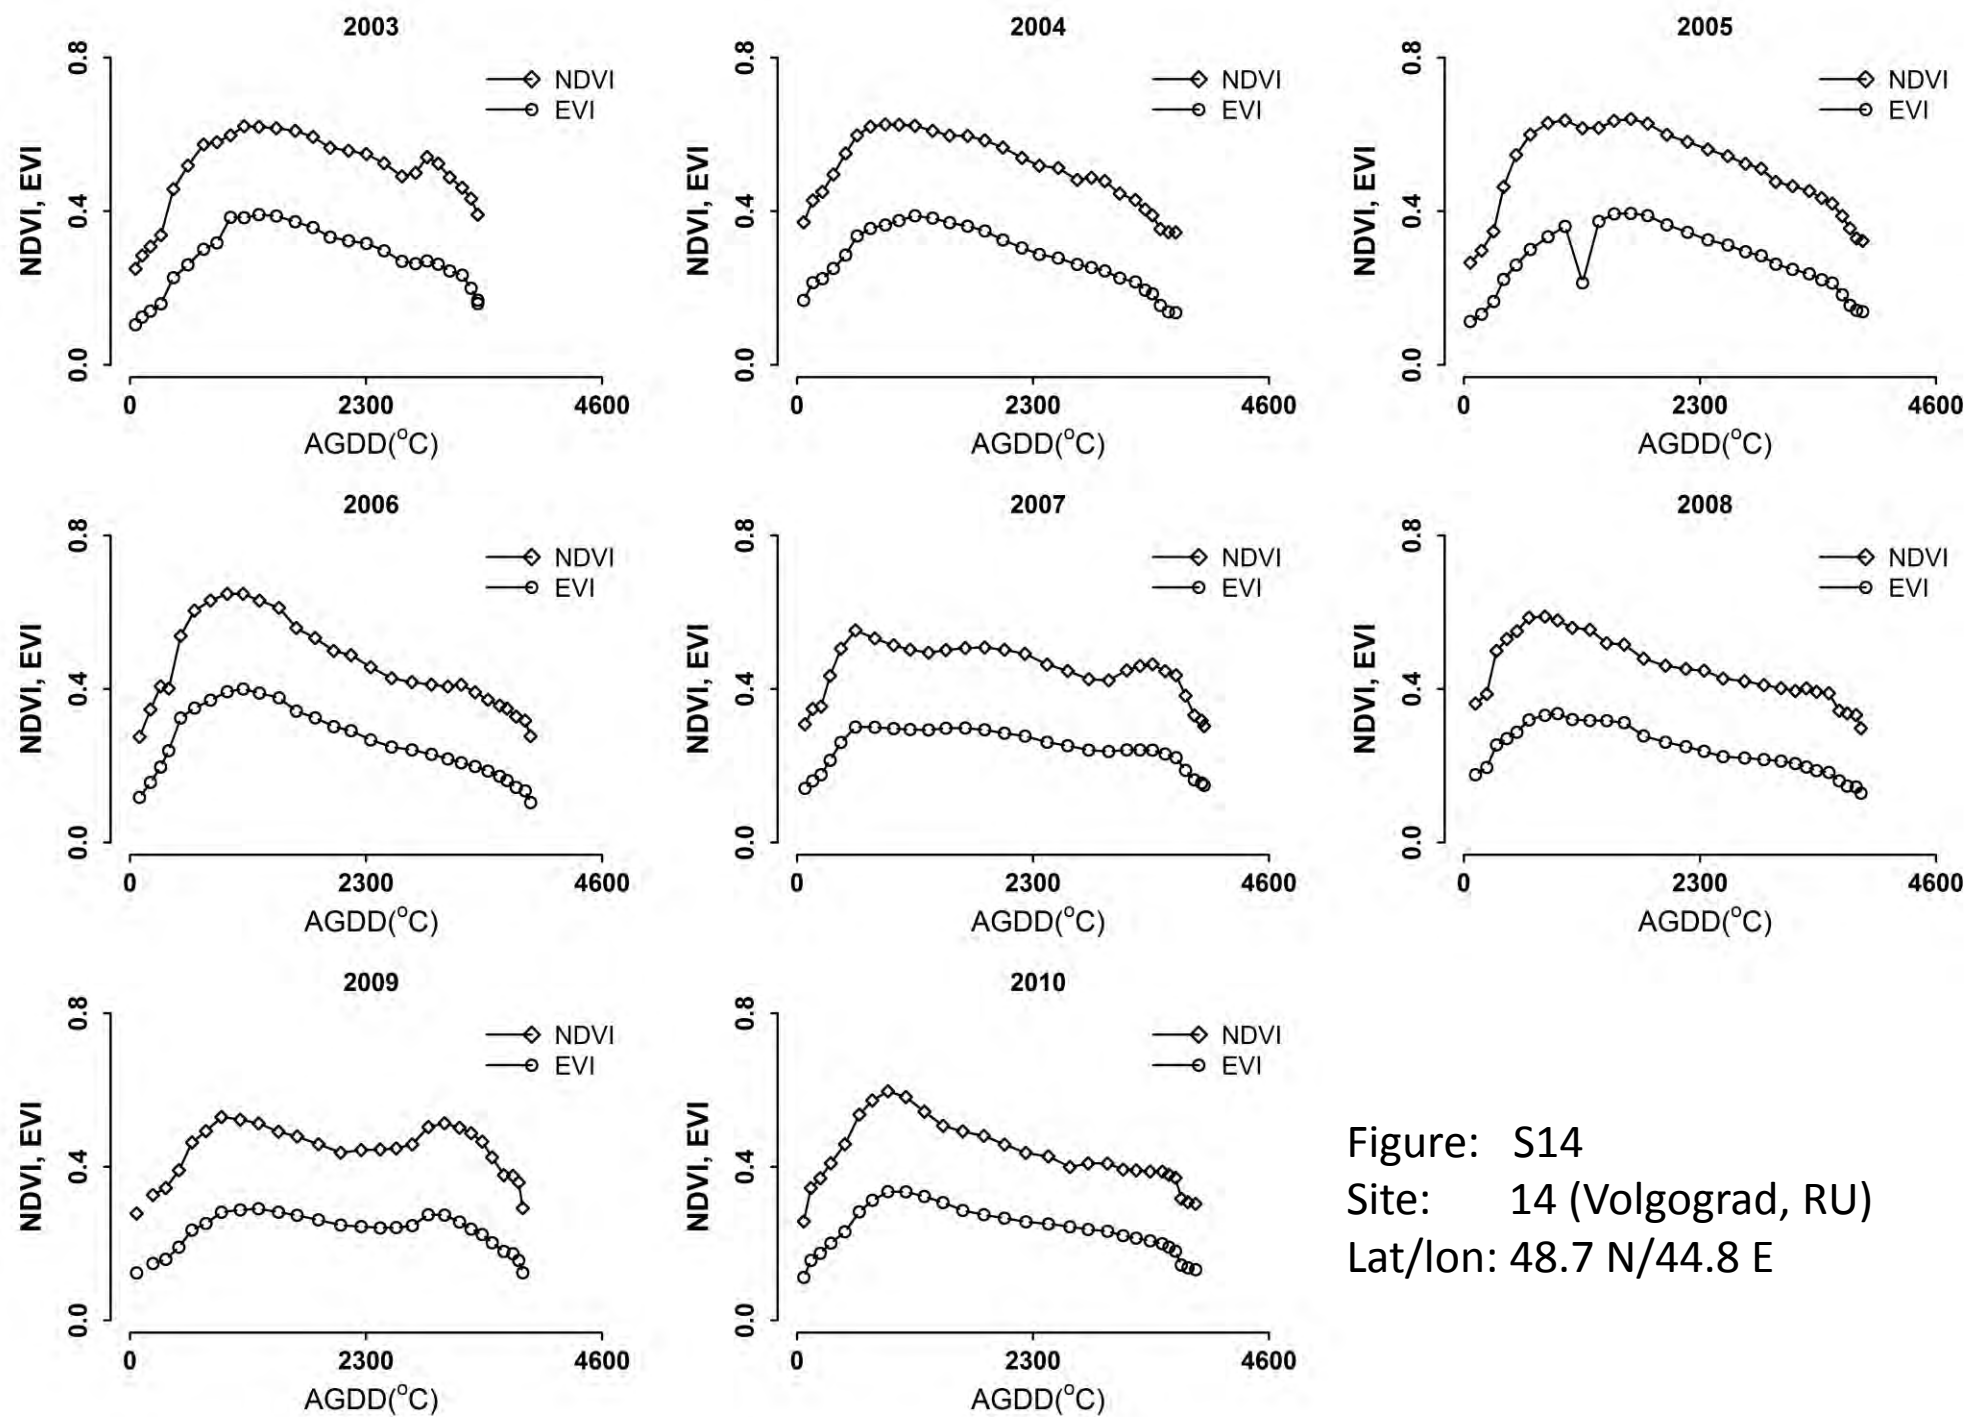

Figure: S14  
 Site: 14 (Volgograd, RU)  
 Lat/lon: 48.7 N/44.8 E

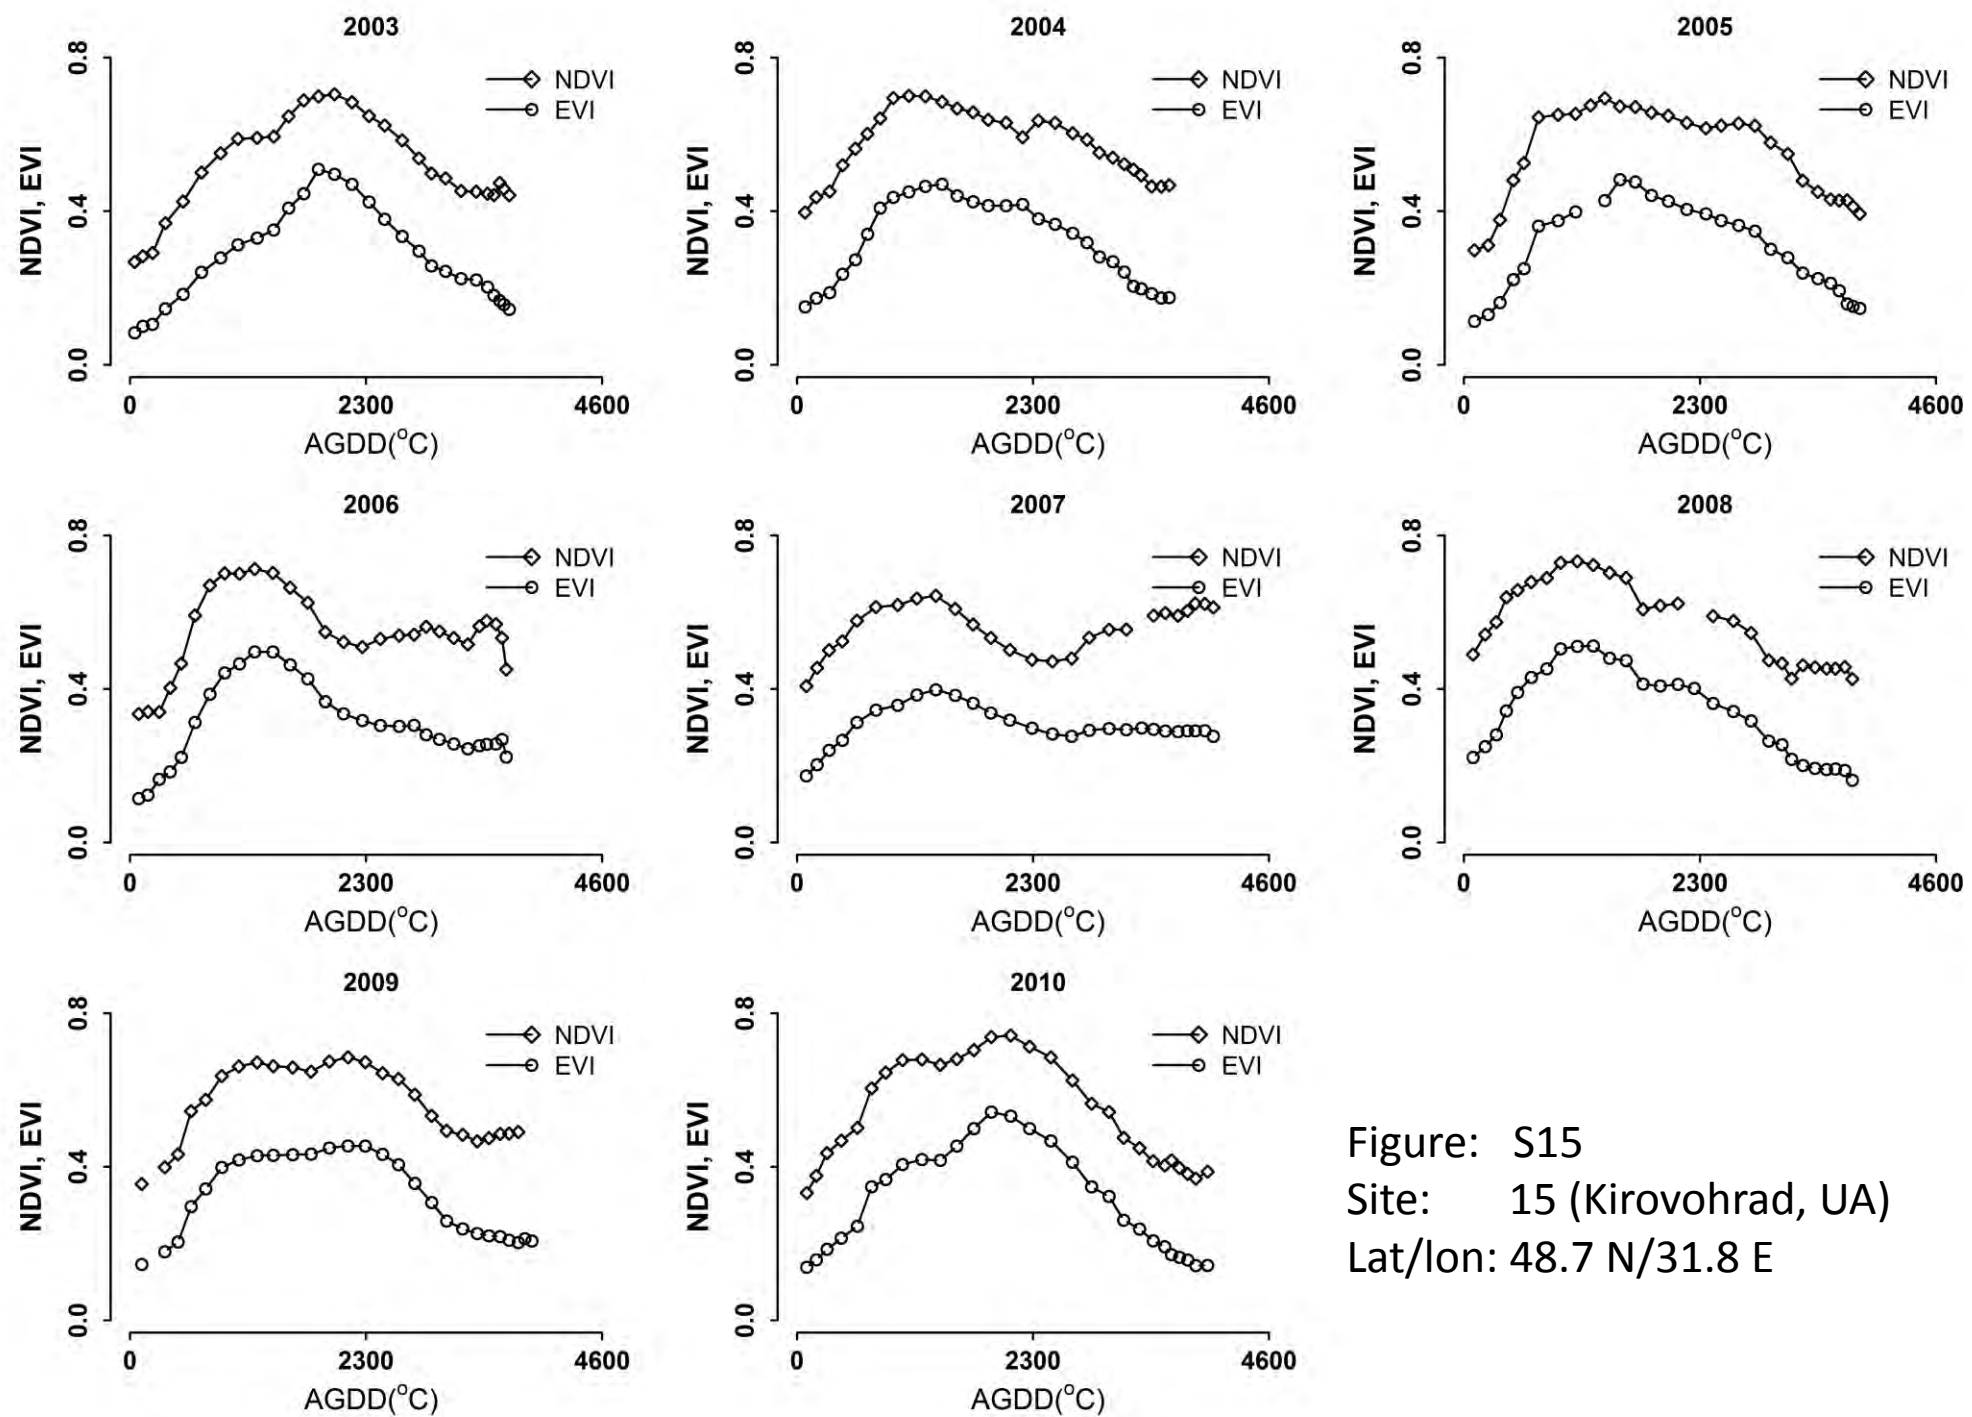

Figure: S15  
Site: 15 (Kirovohrad, UA)  
Lat/lon: 48.7 N/31.8 E



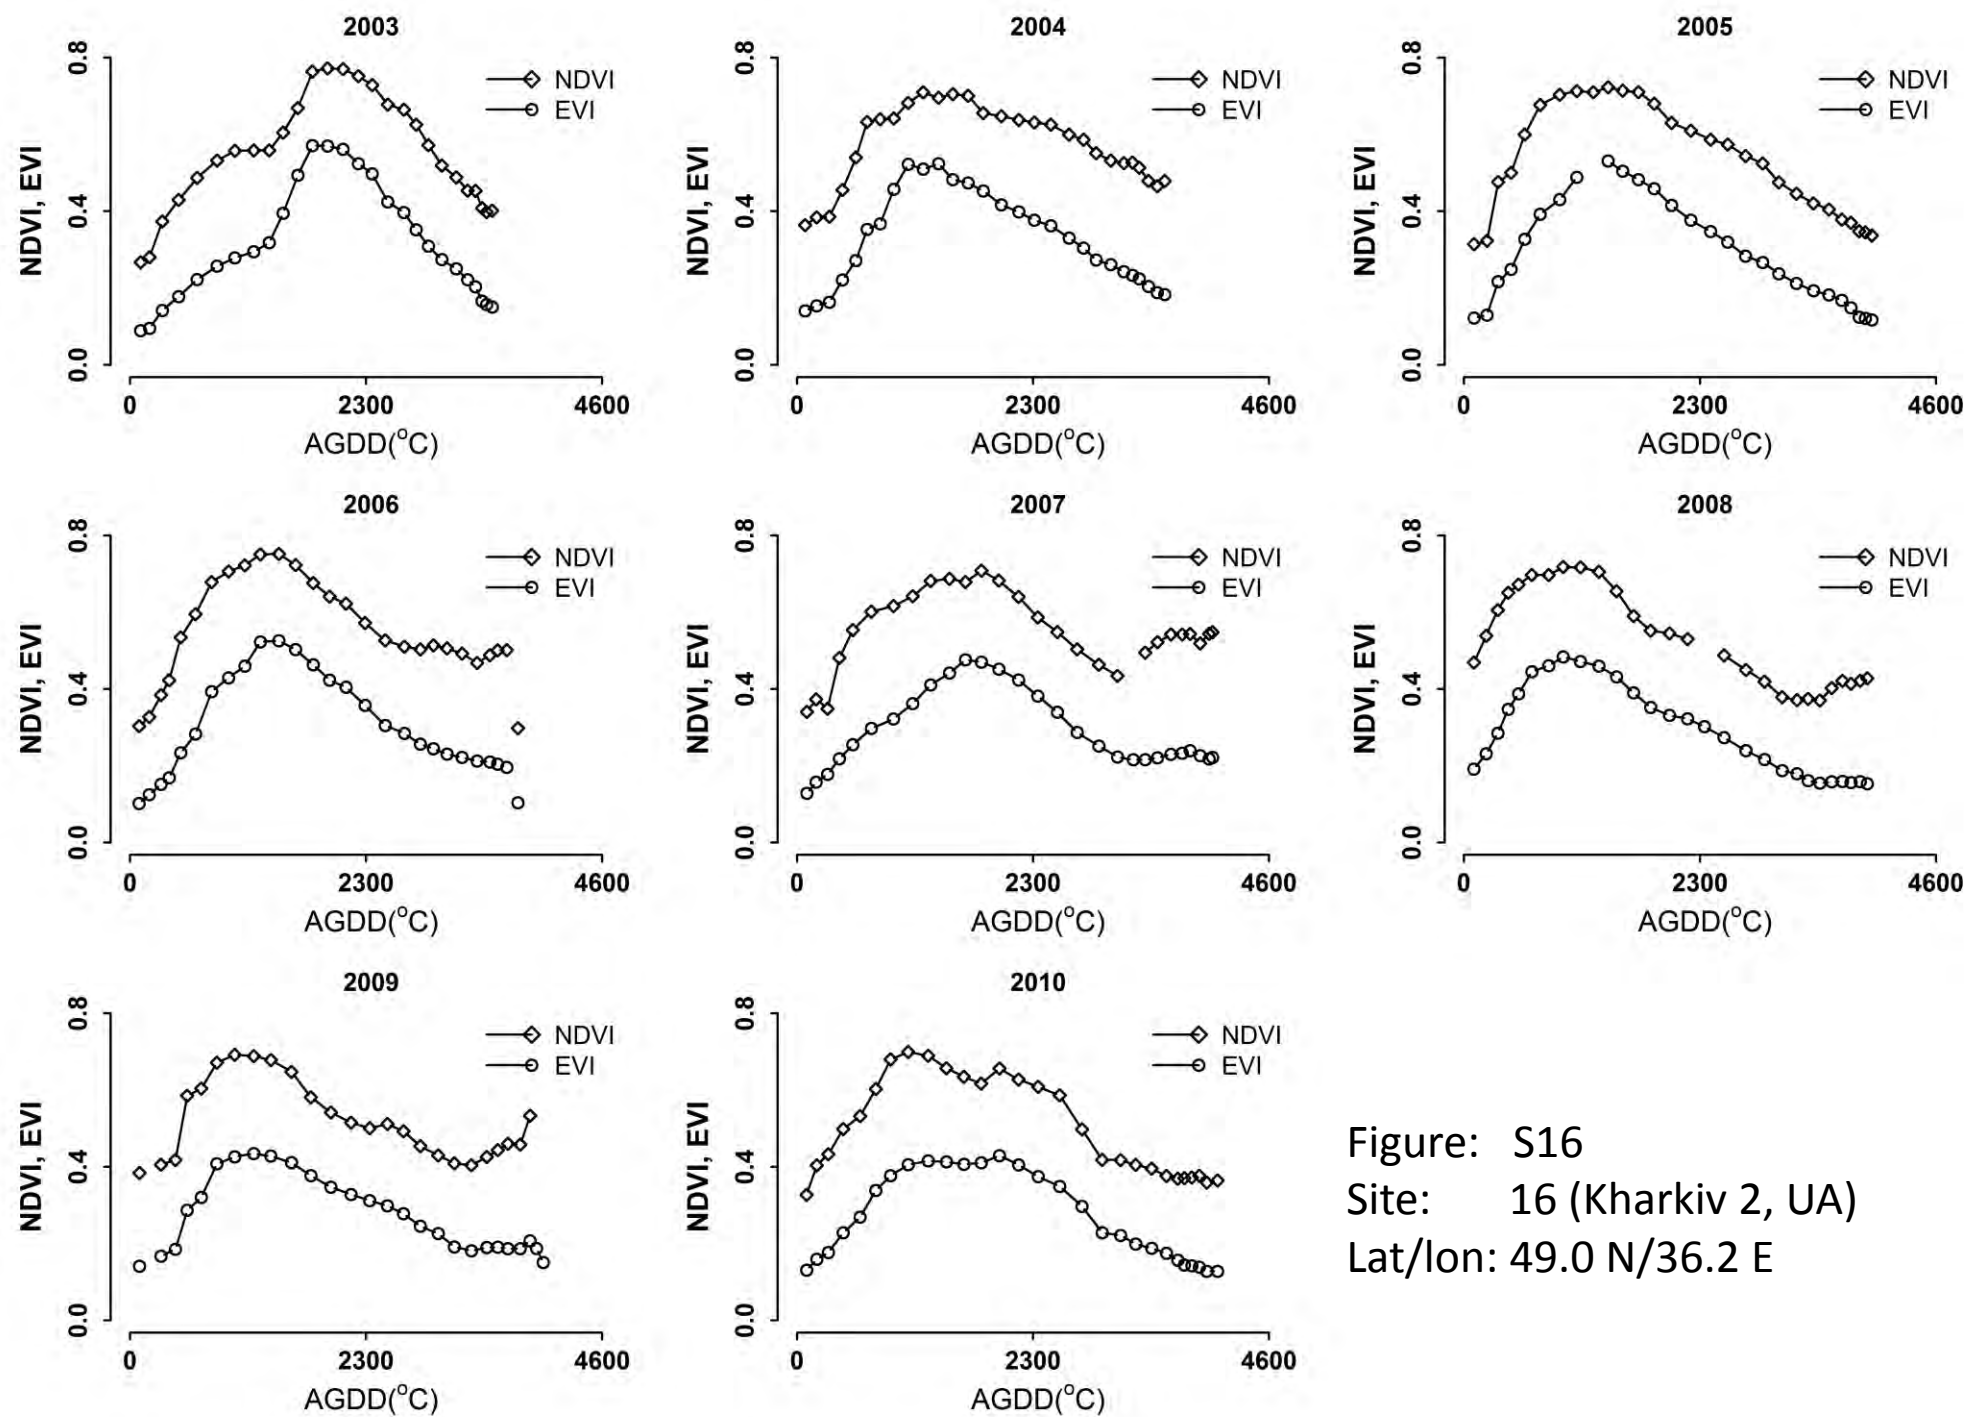

Figure: S16  
Site: 16 (Kharkiv 2, UA)  
Lat/Ion: 49.0 N/36.2 E

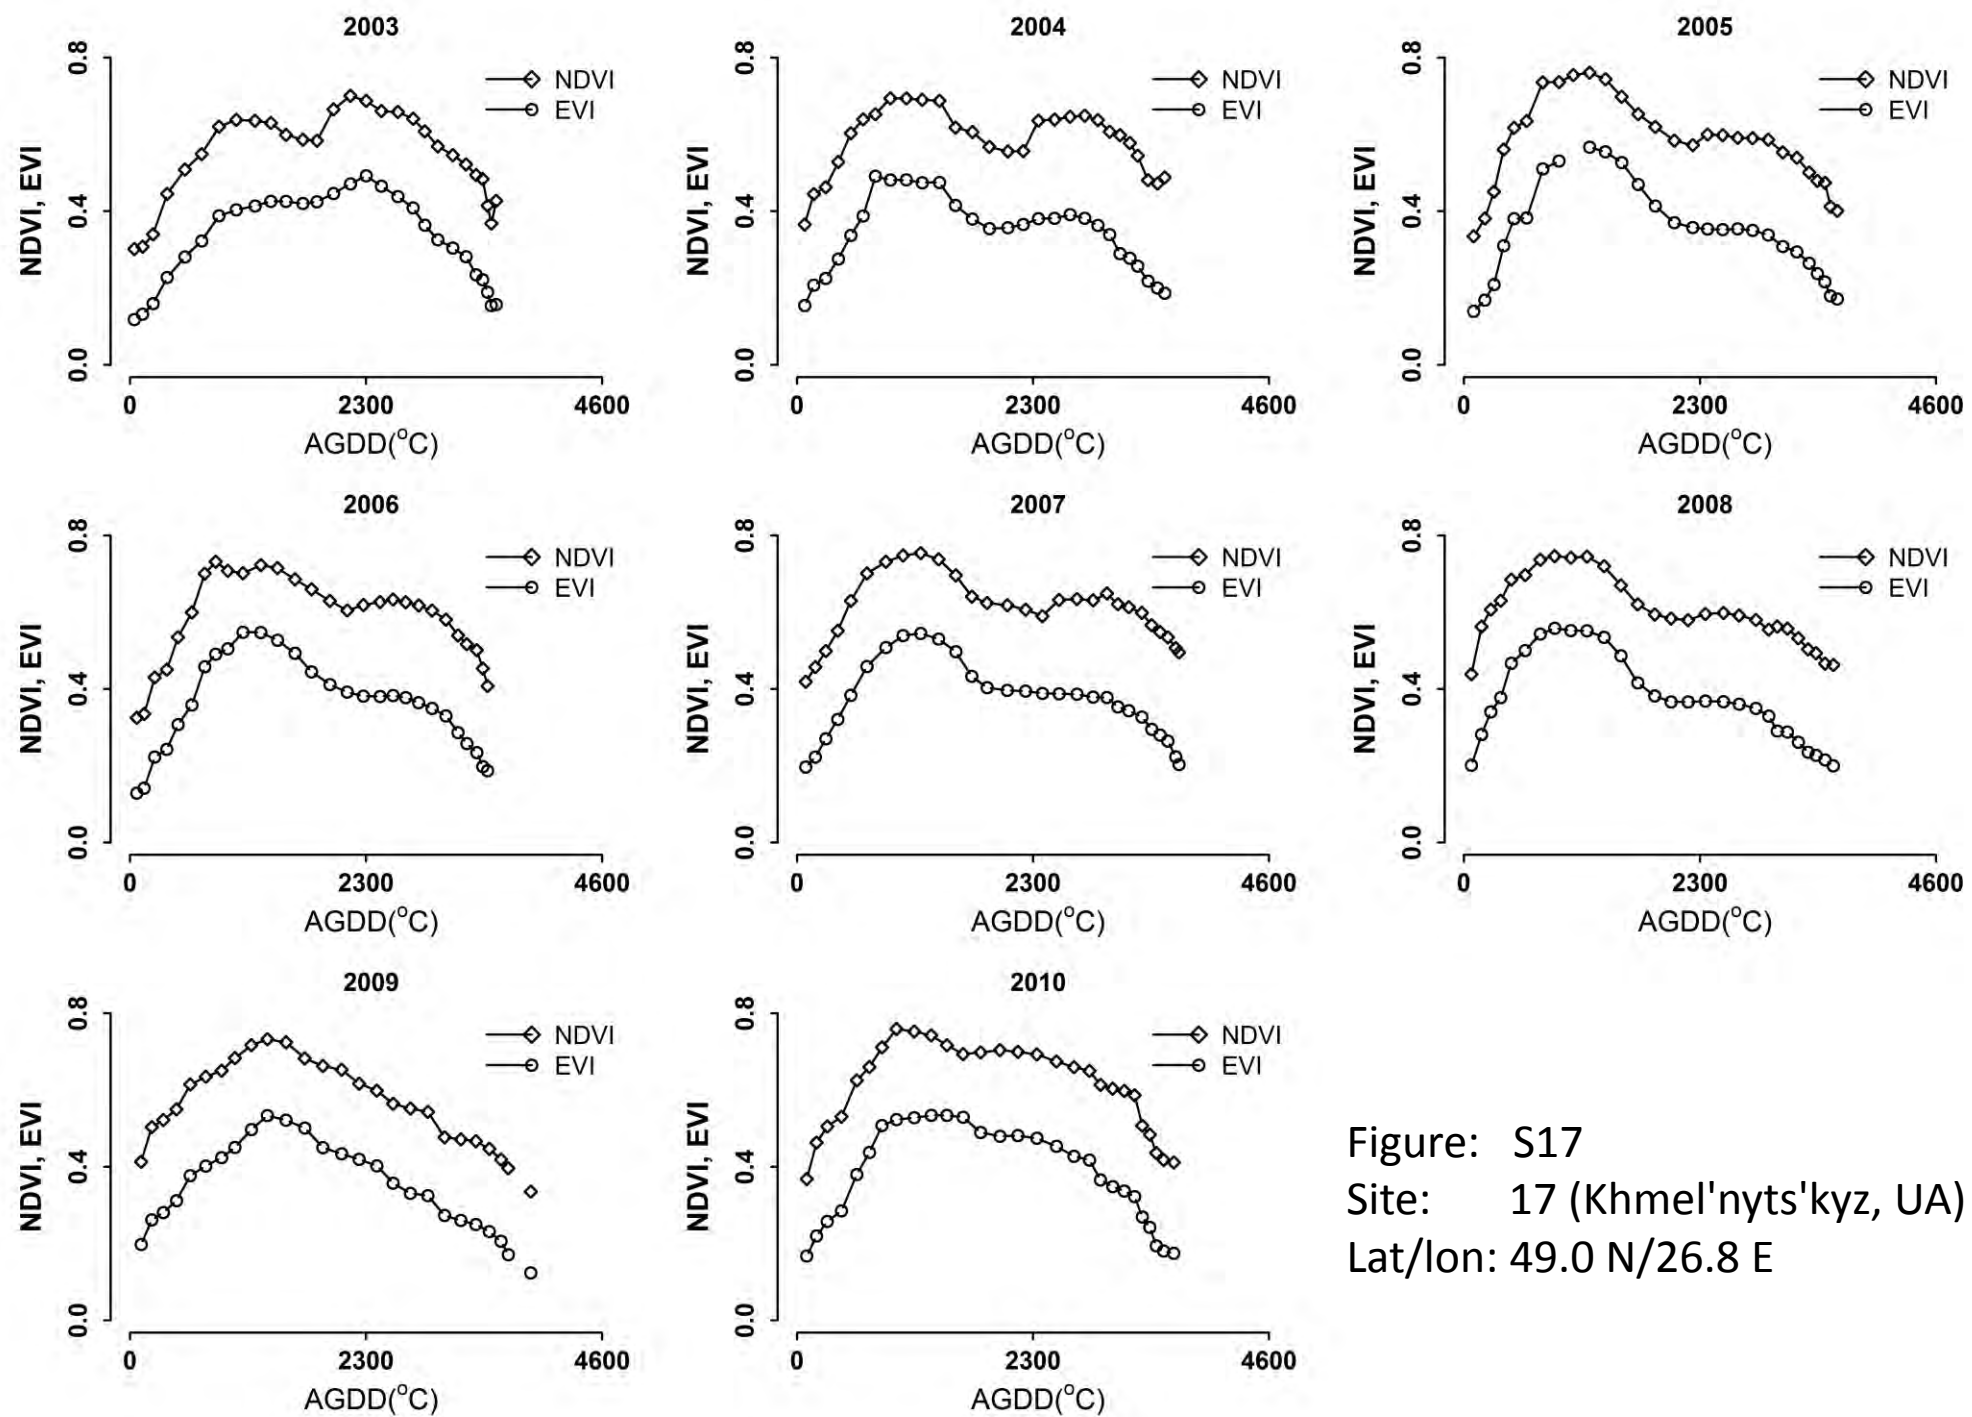

Figure: S17  
 Site: 17 (Khmel'nyts'kyz, UA)  
 Lat/lon: 49.0 N/26.8 E

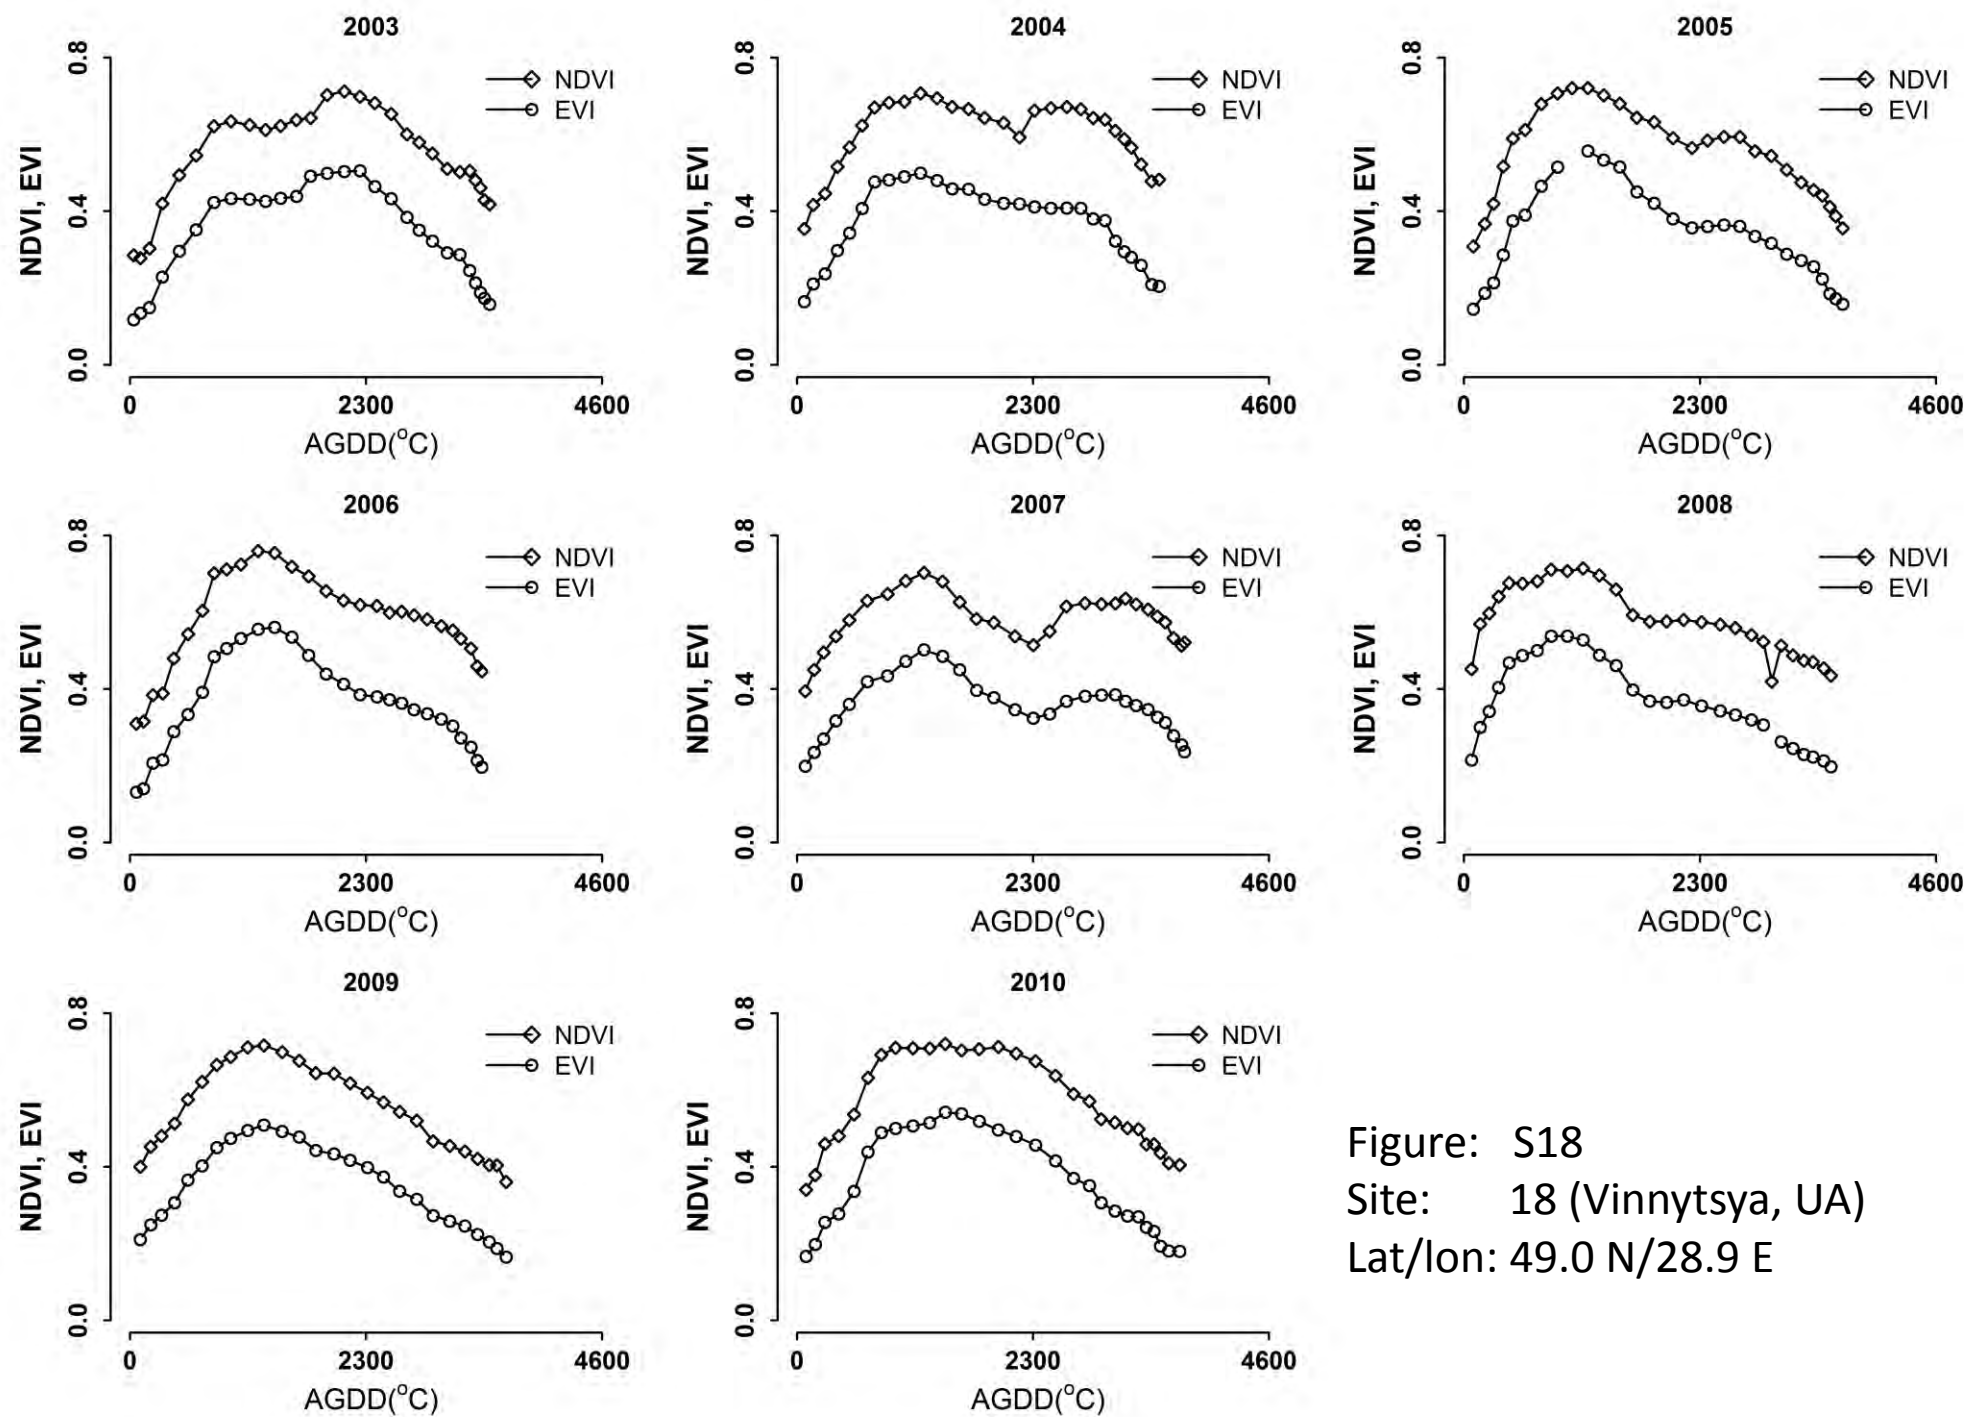

Figure: S18  
Site: 18 (Vinnytsya, UA)  
Lat/Ion: 49.0 N/28.9 E

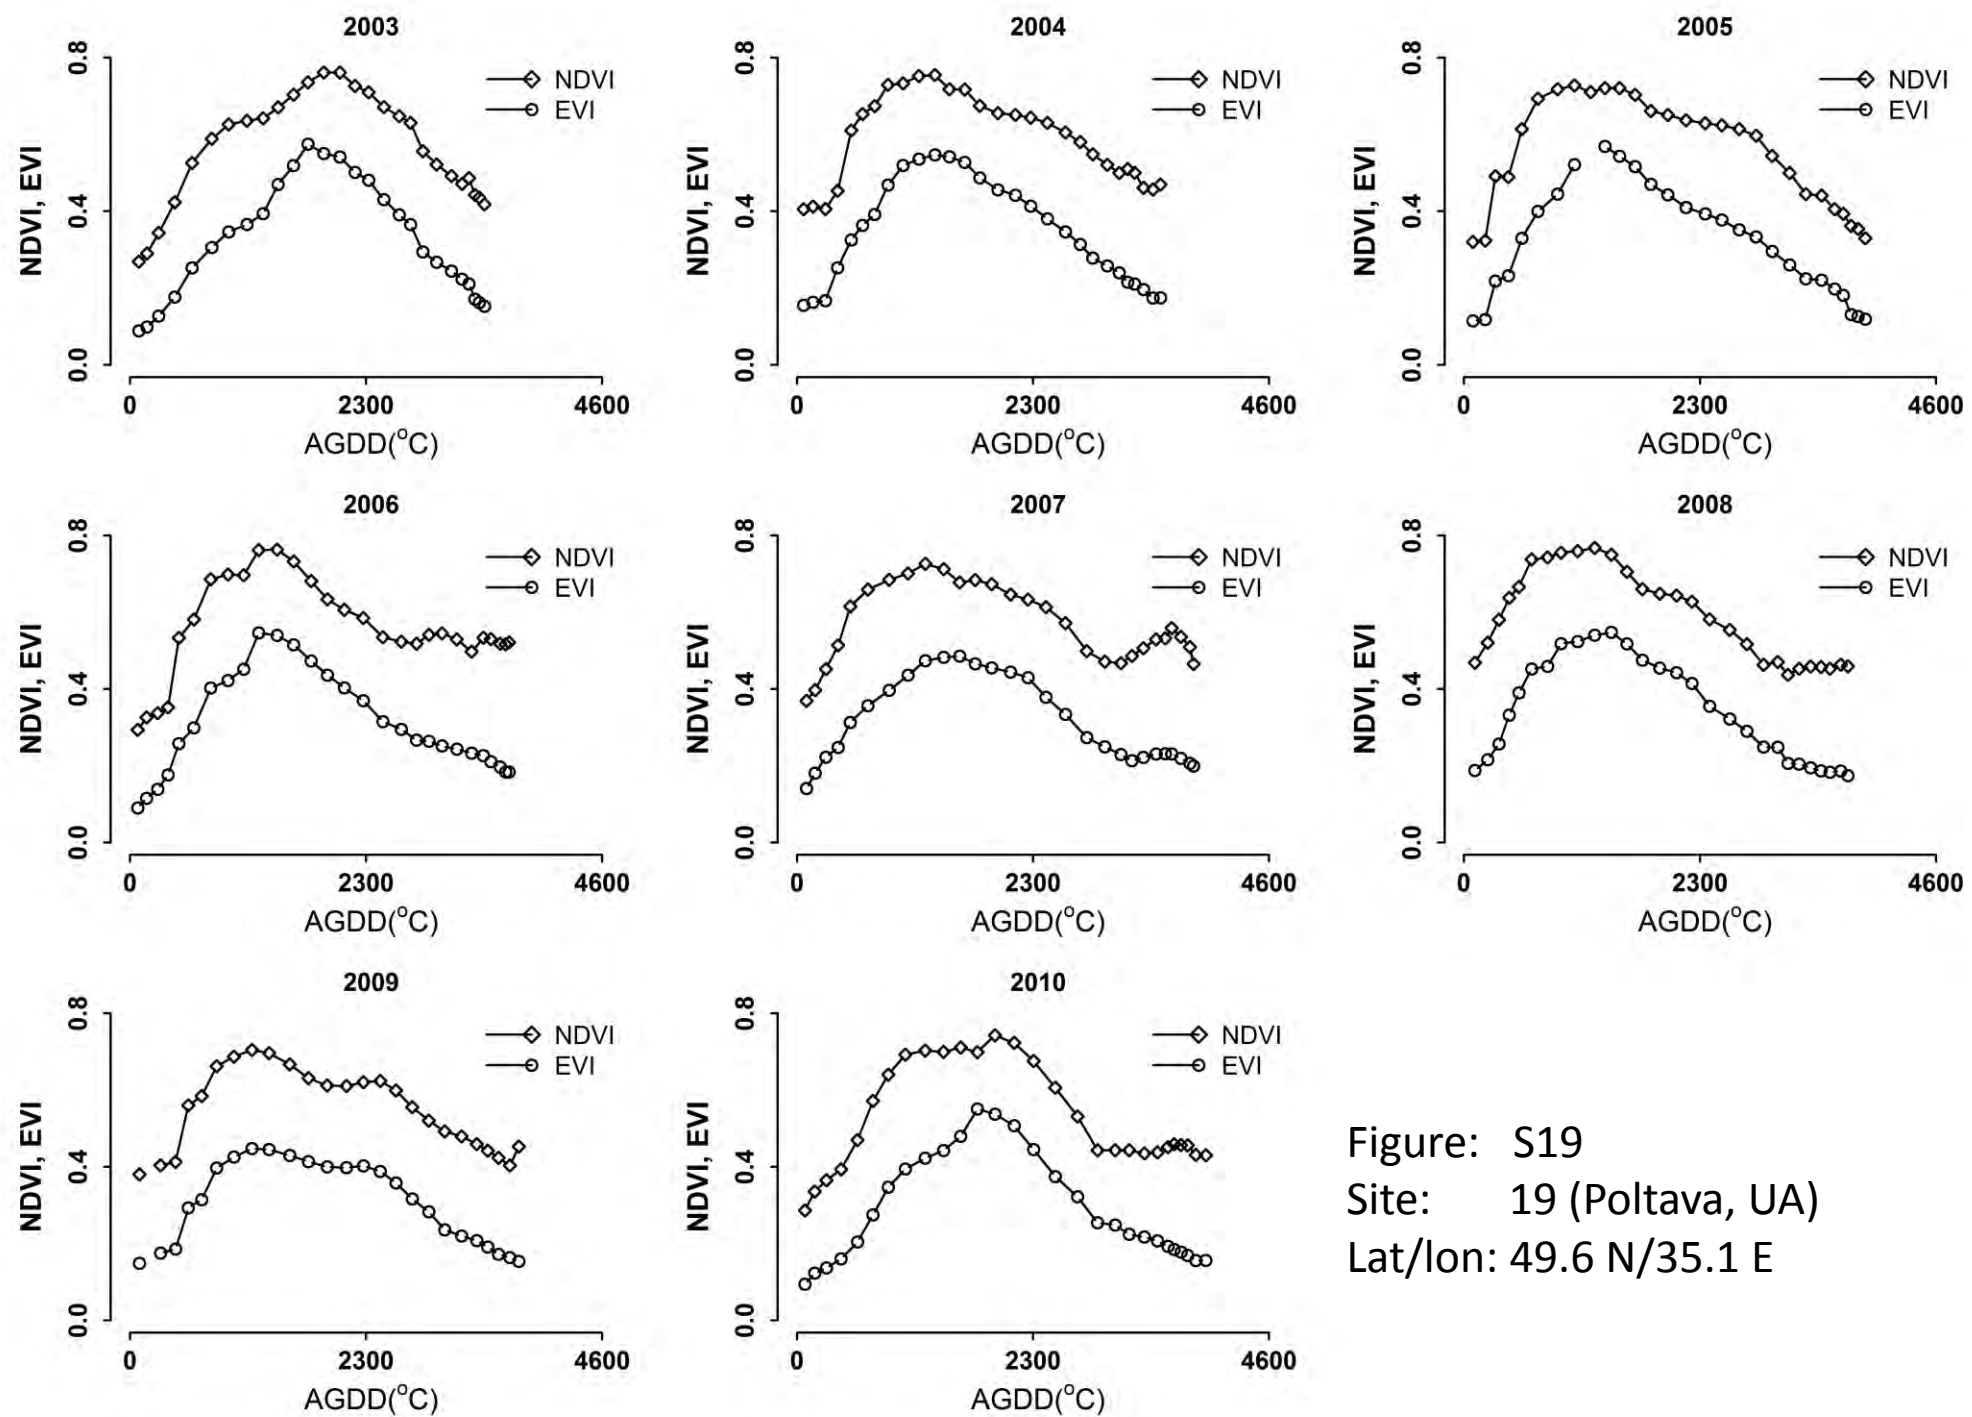

Figure: S19  
Site: 19 (Poltava, UA)  
Lat/Ion: 49.6 N/35.1 E

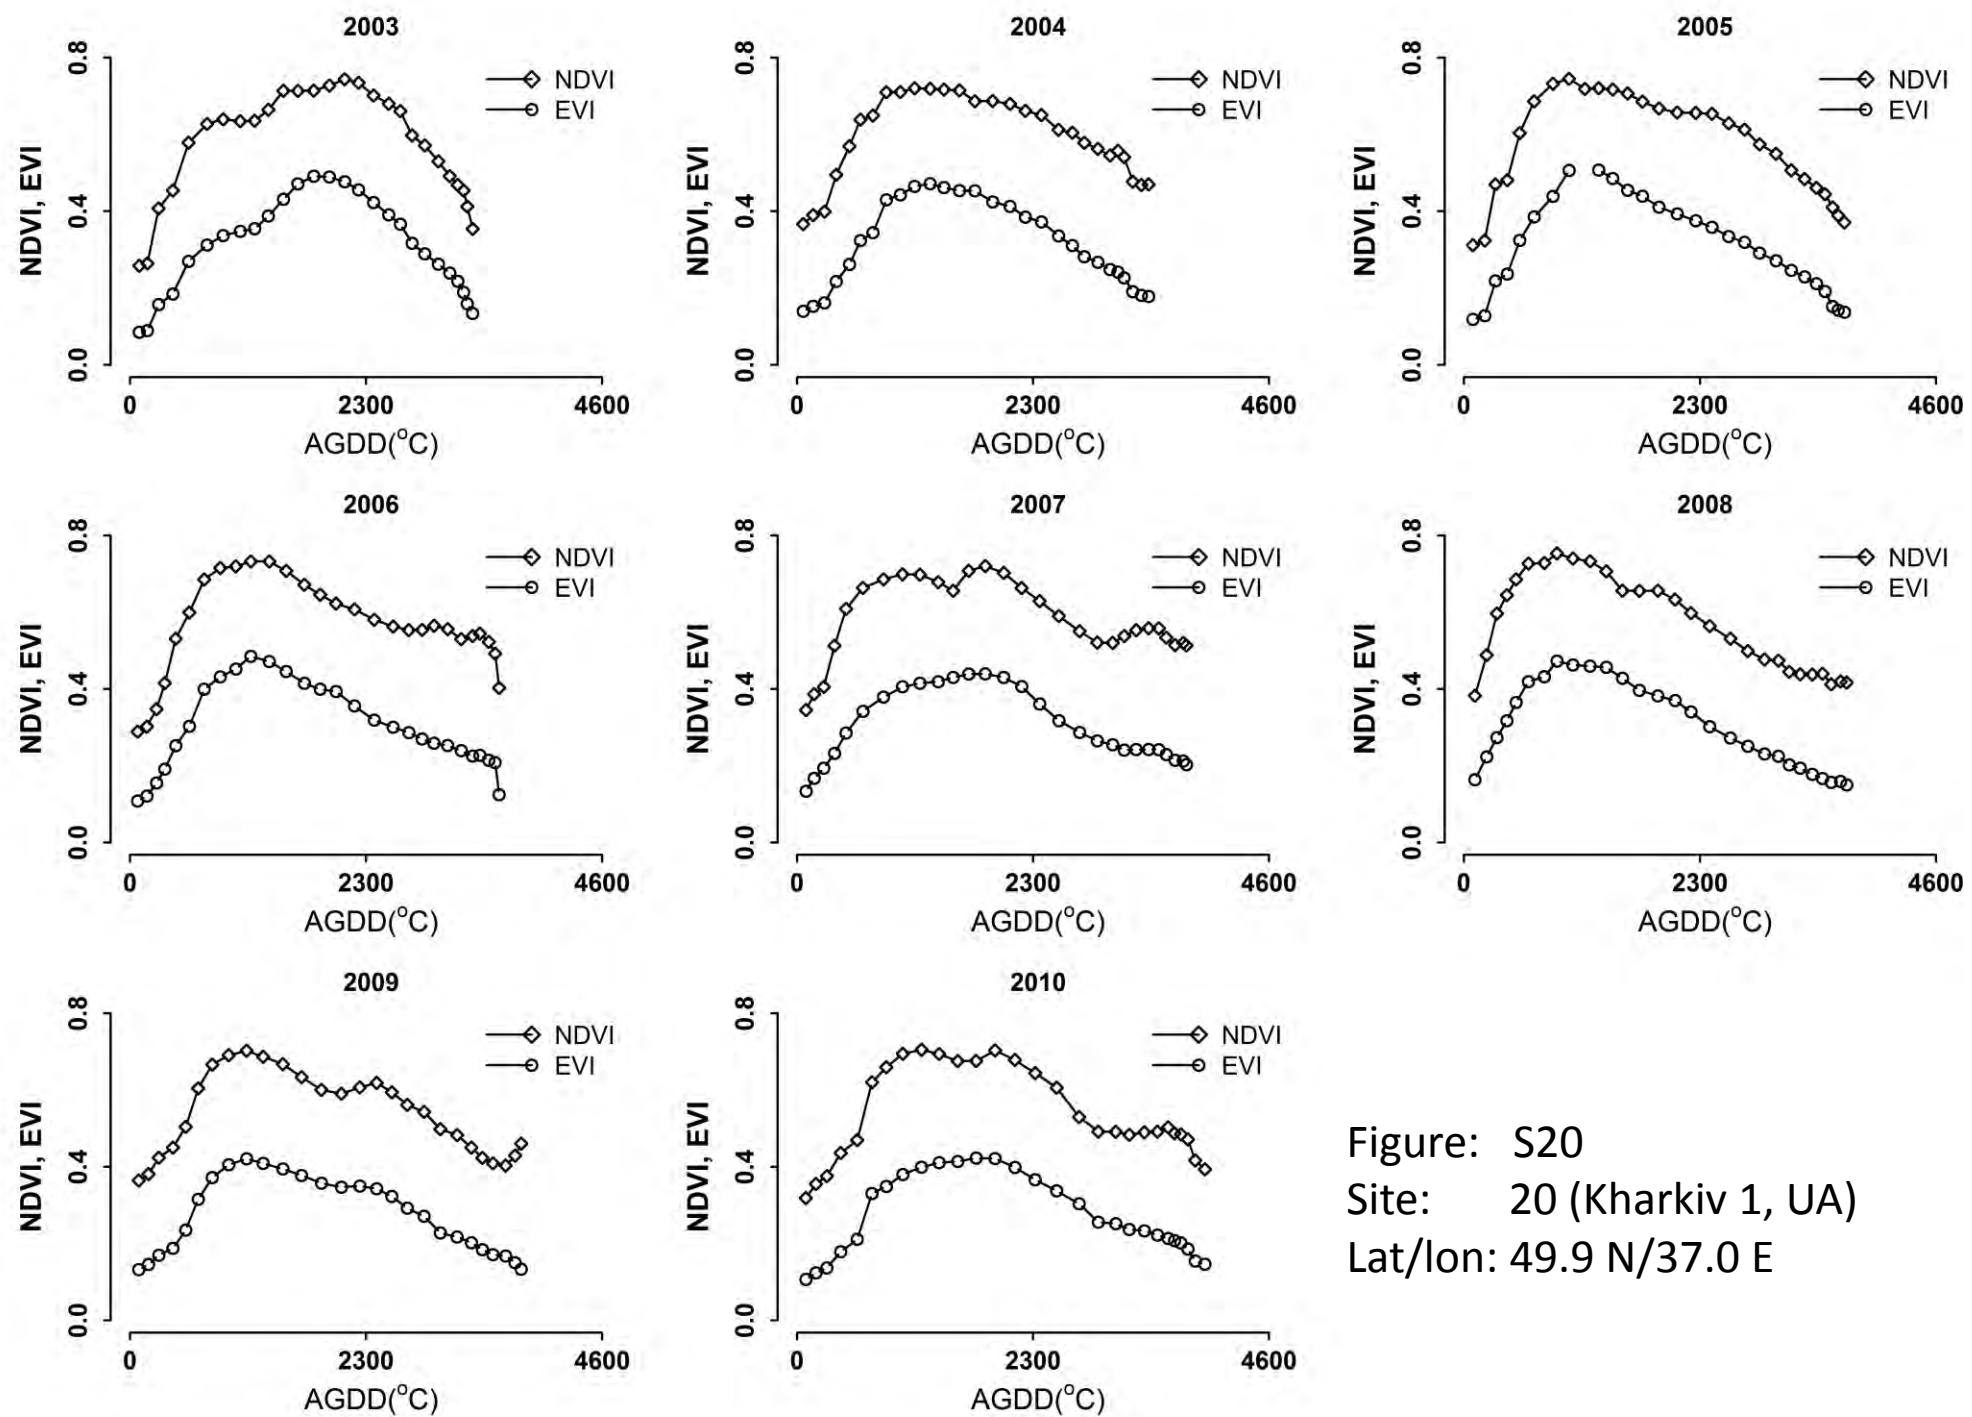

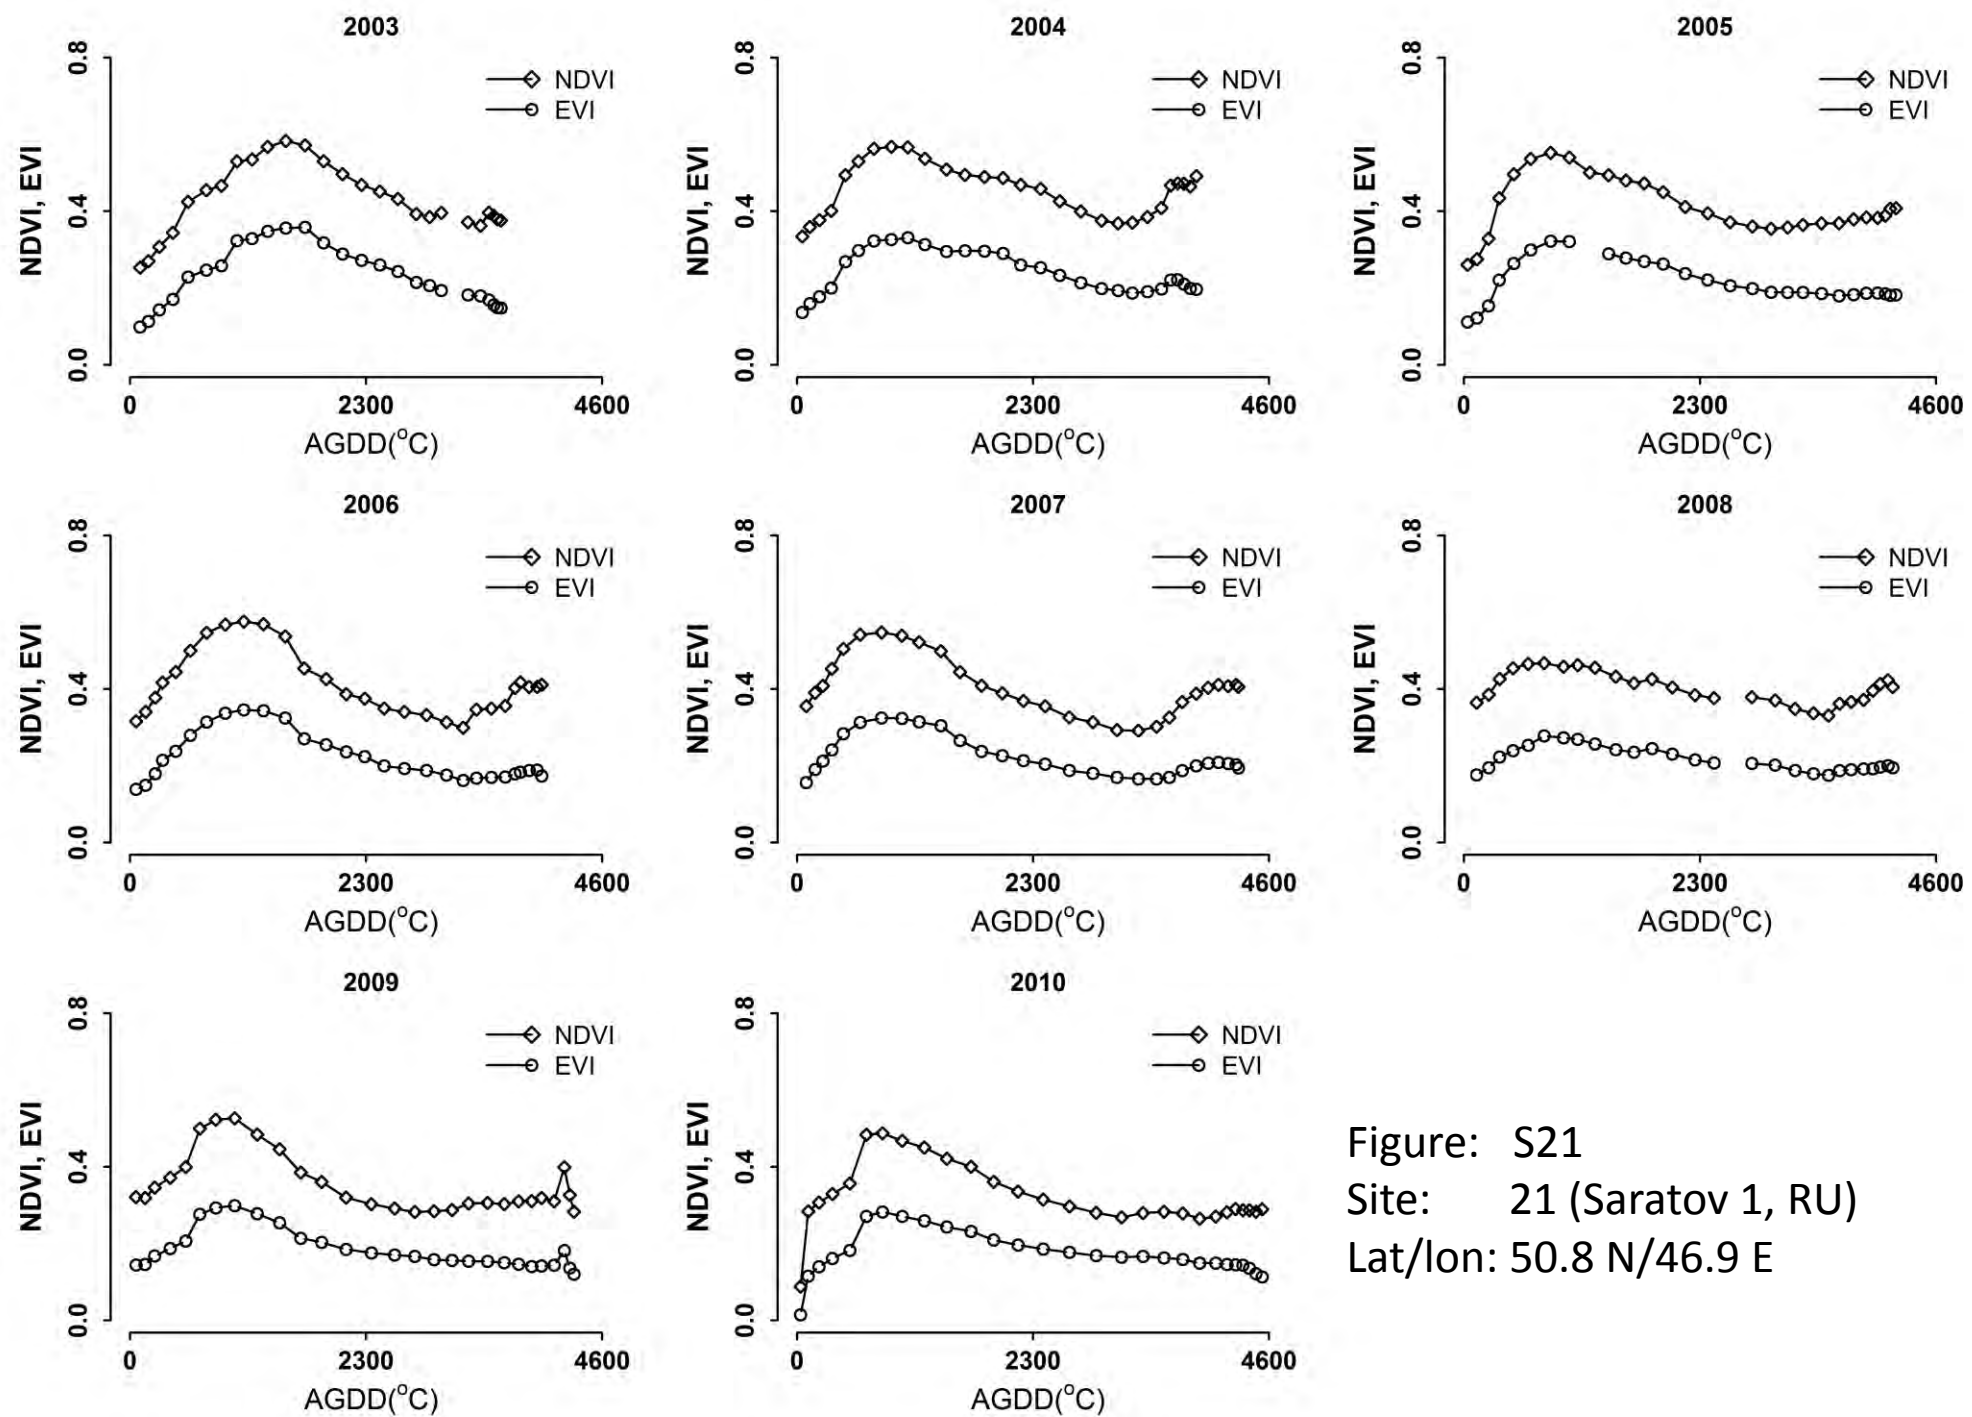

Figure: S21  
 Site: 21 (Saratov 1, RU)  
 Lat/Ion: 50.8 N/46.9 E

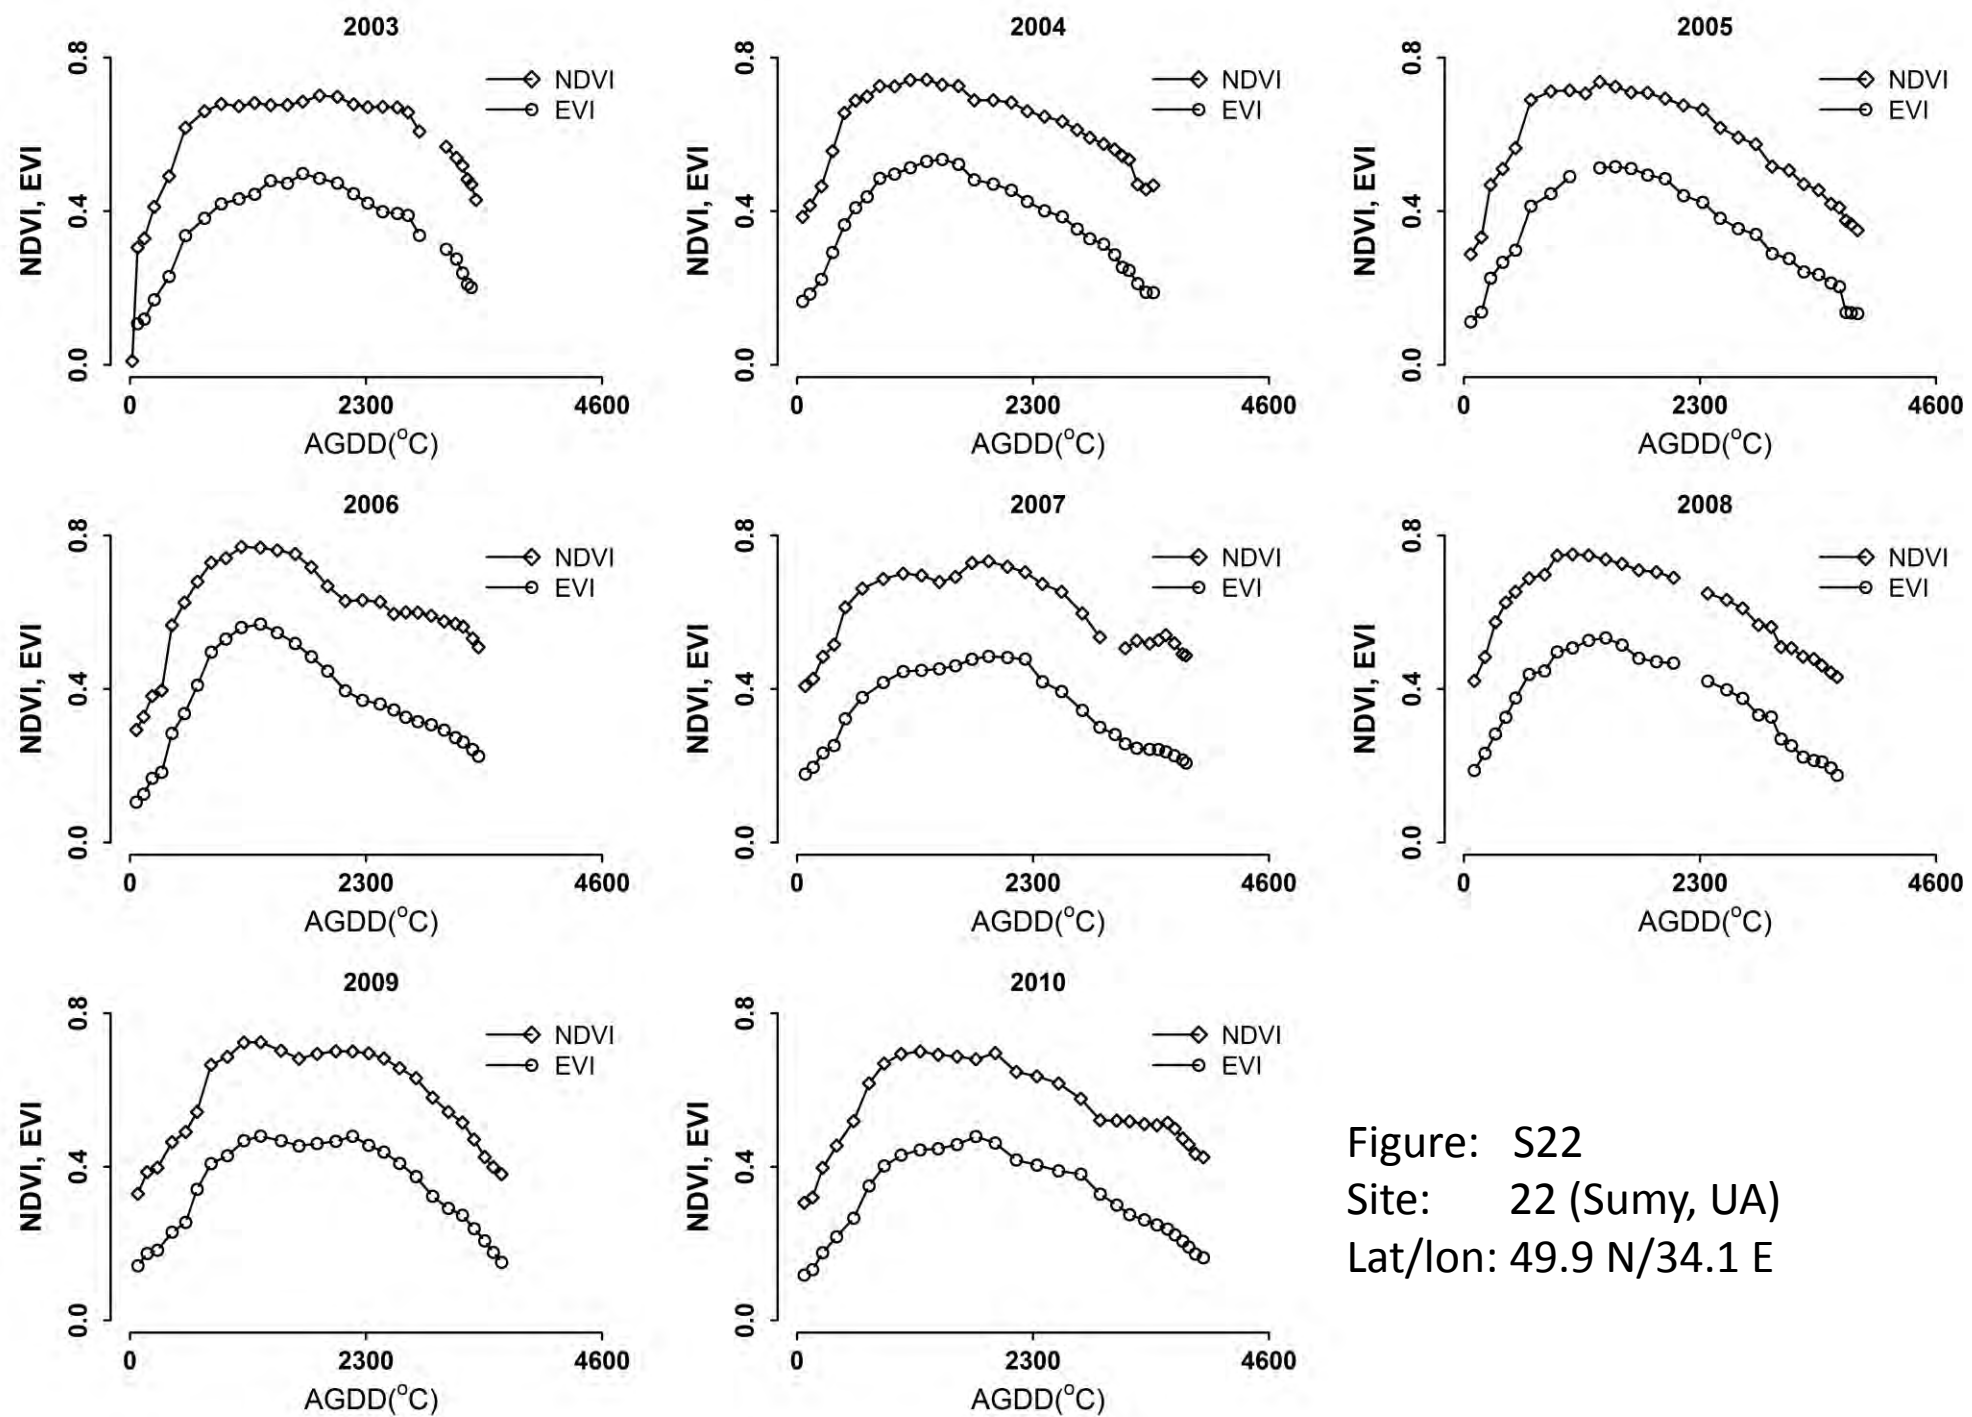

Figure: S22  
 Site: 22 (Sumy, UA)  
 Lat/Ion: 49.9 N/34.1 E



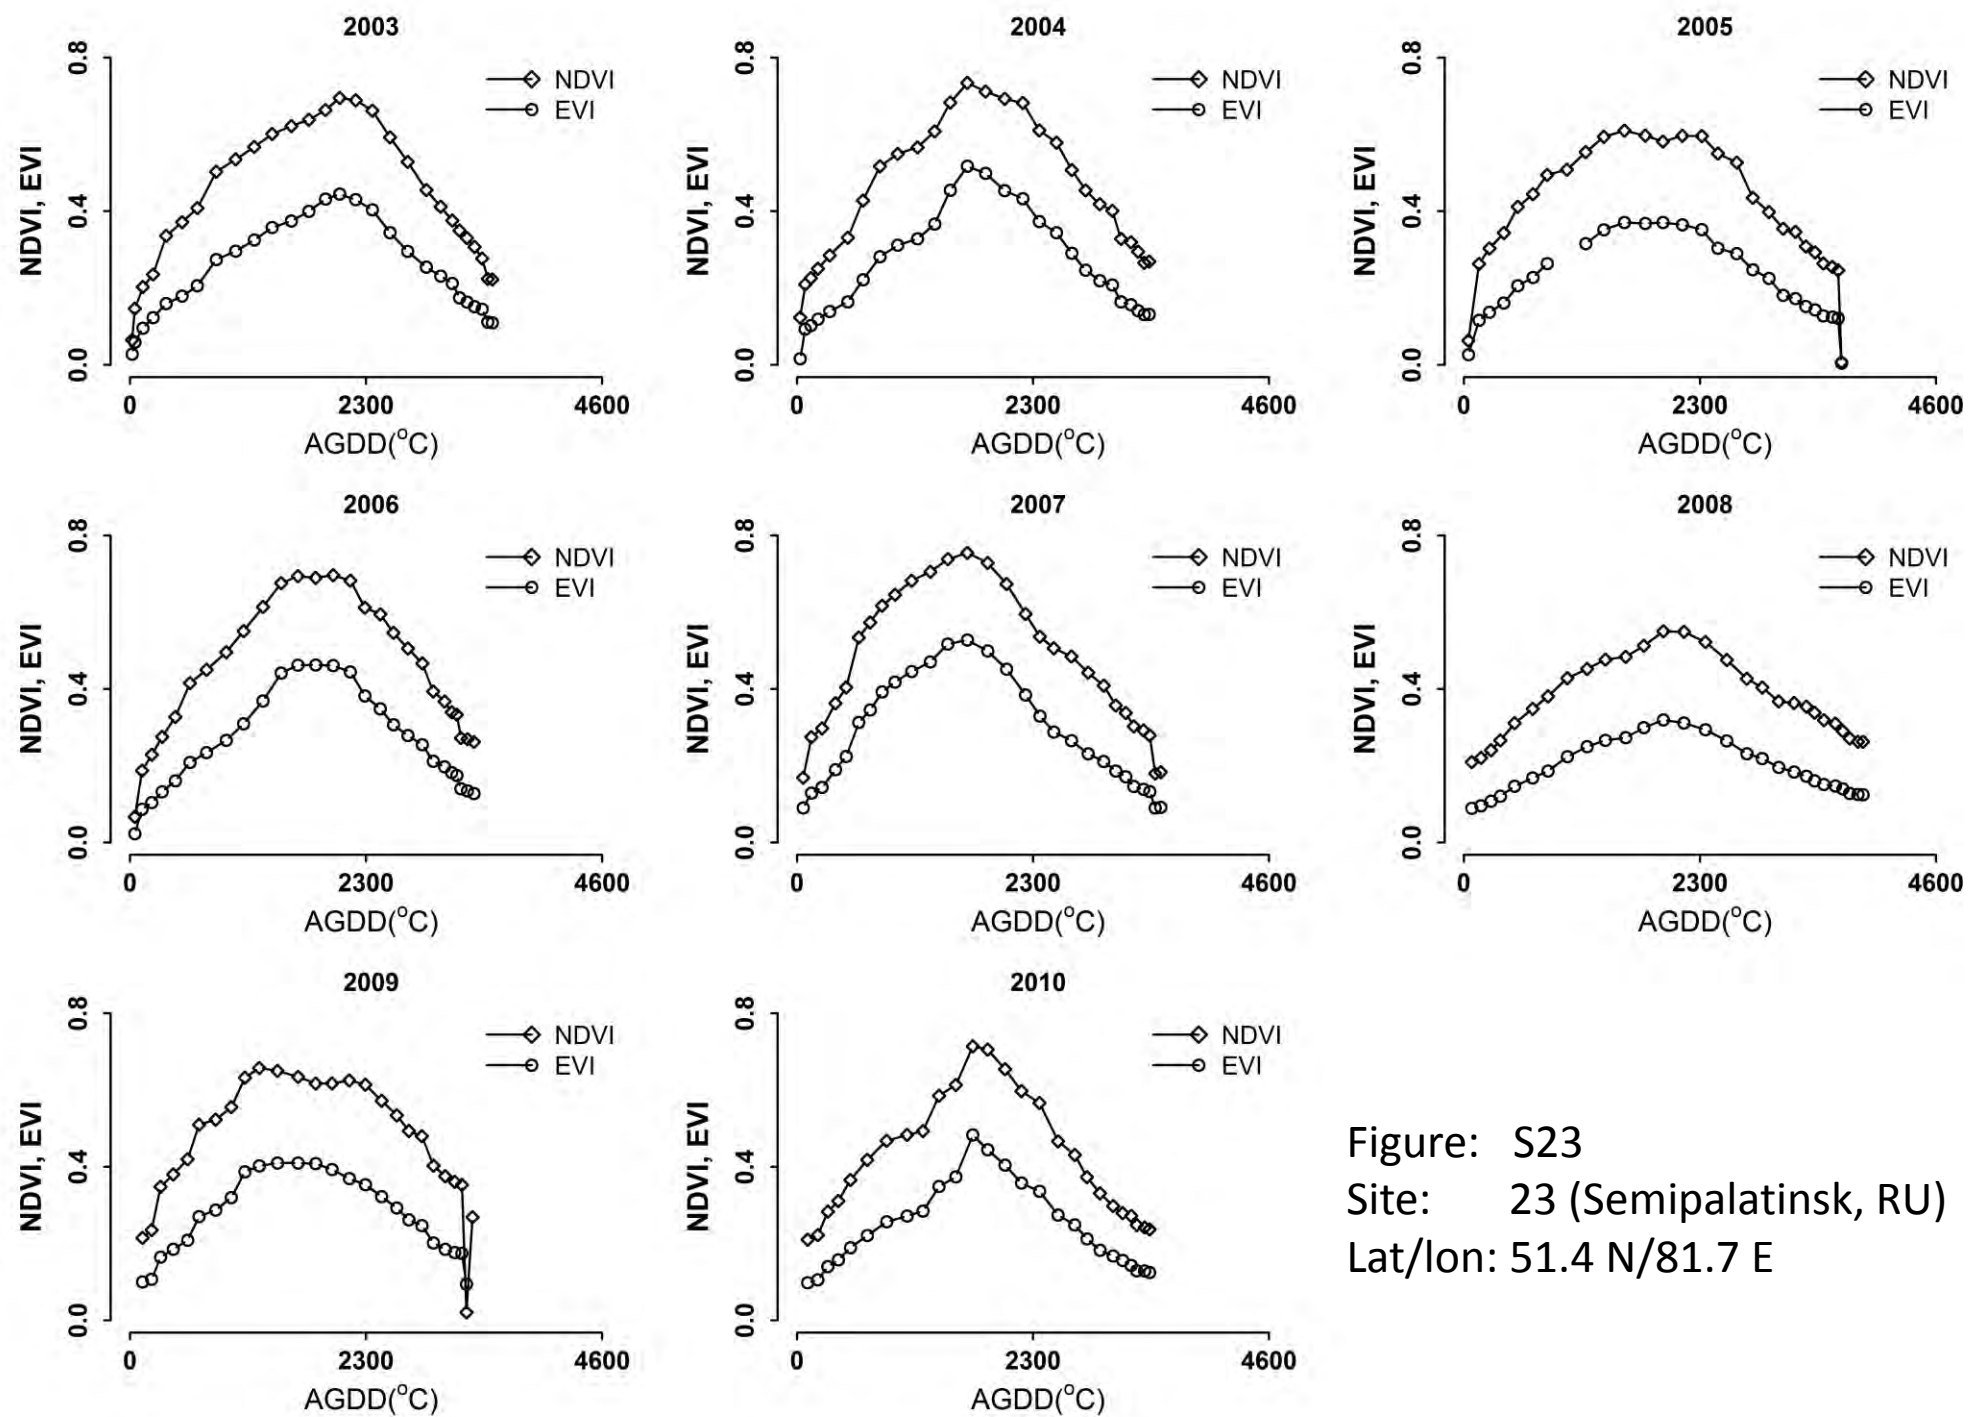

Figure: S23  
 Site: 23 (Semipalatinsk, RU)  
 Lat/Ion: 51.4 N/81.7 E

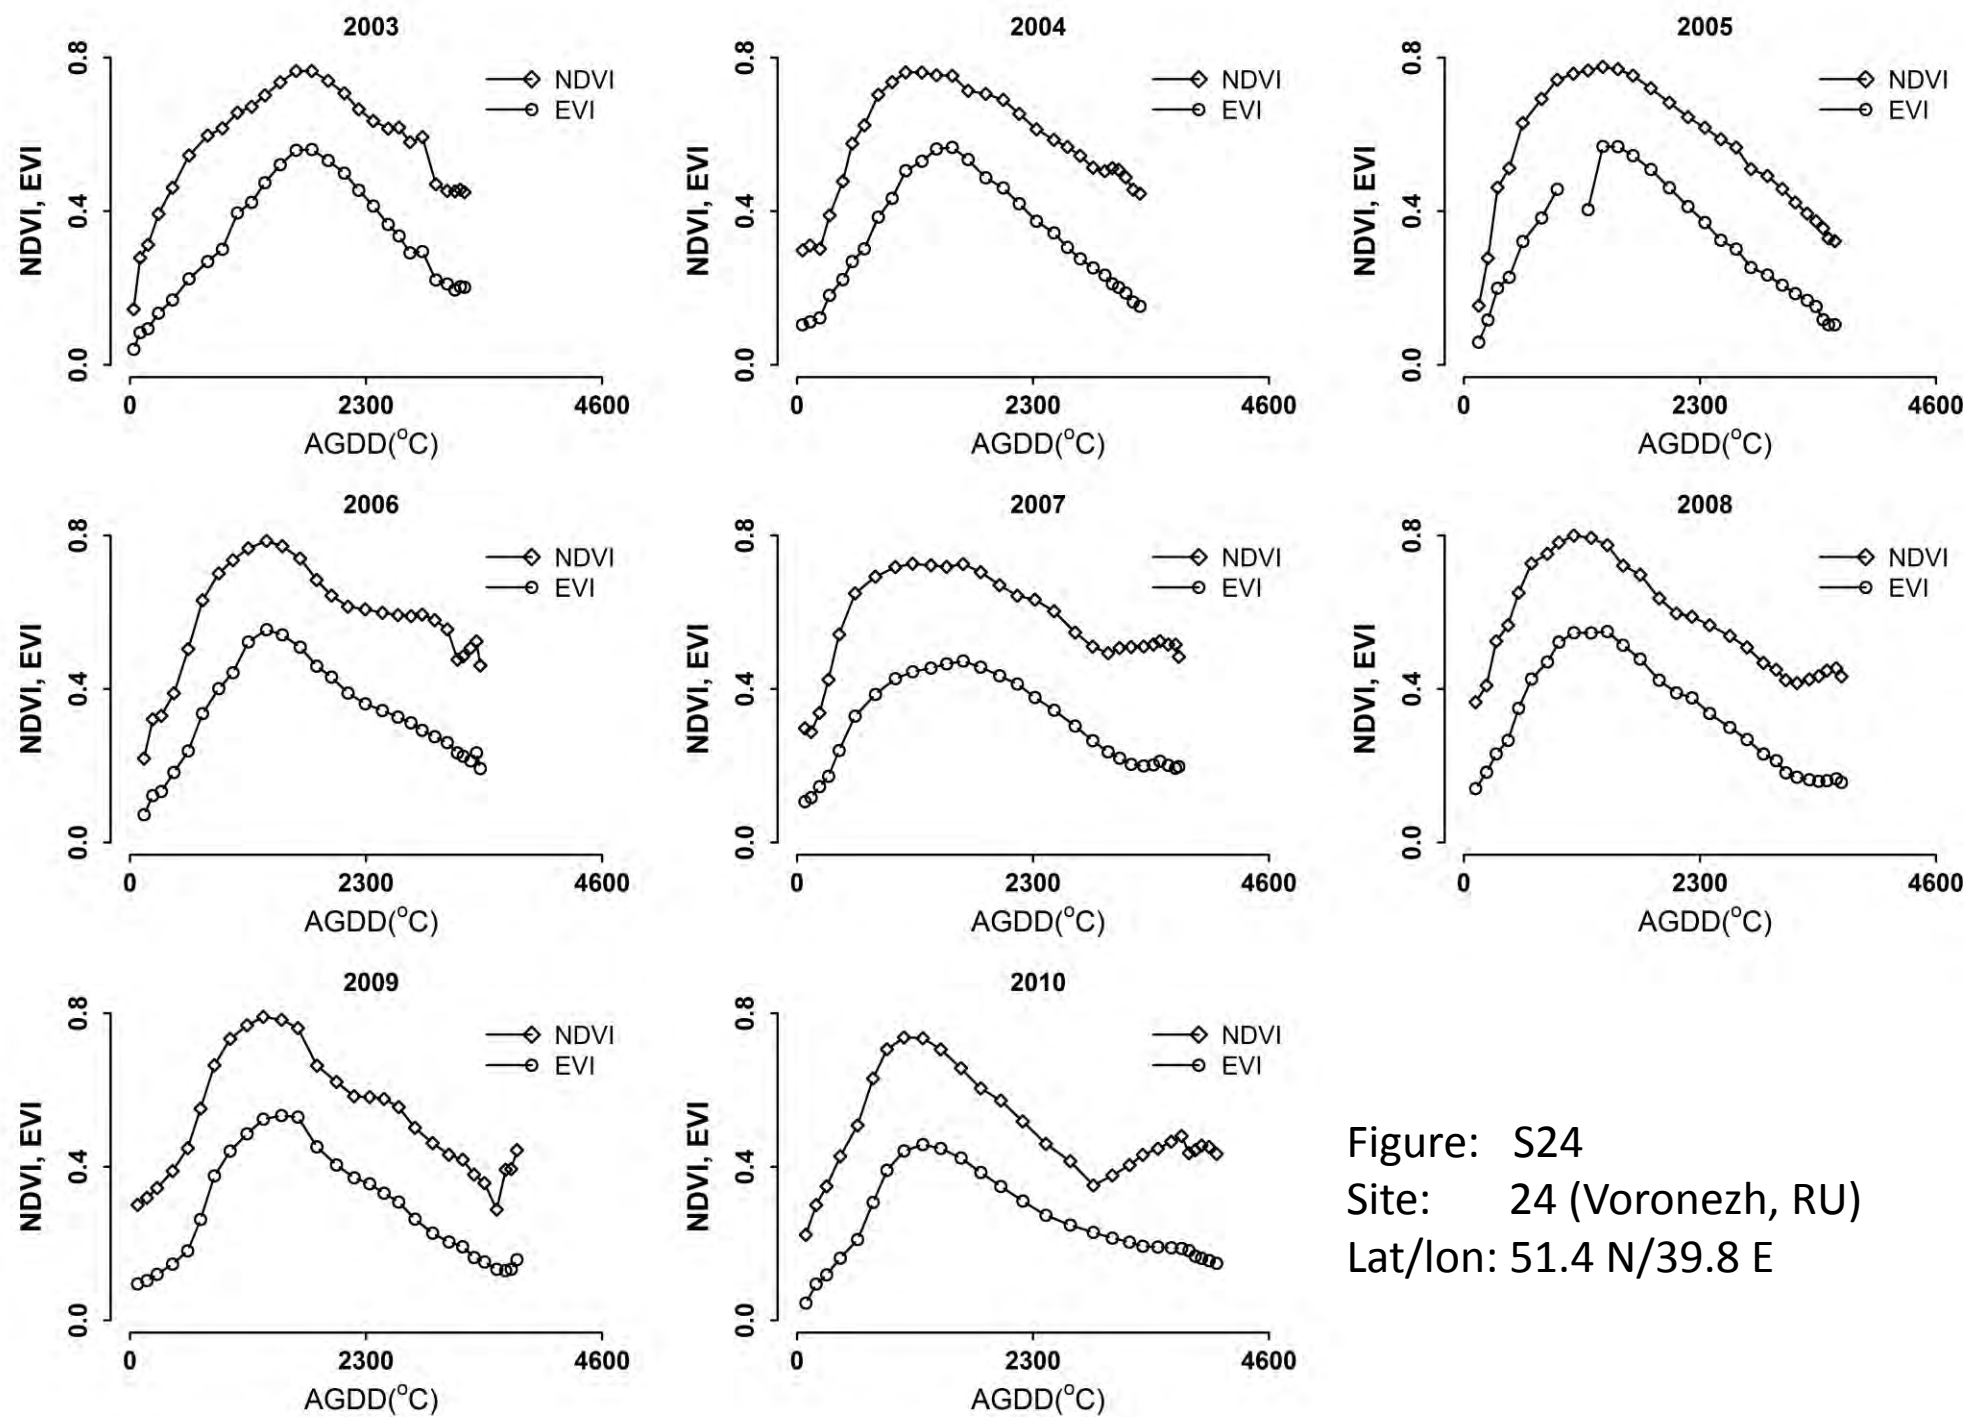

Figure: S24  
Site: 24 (Voronezh, RU)  
Lat/Ion: 51.4 N/39.8 E

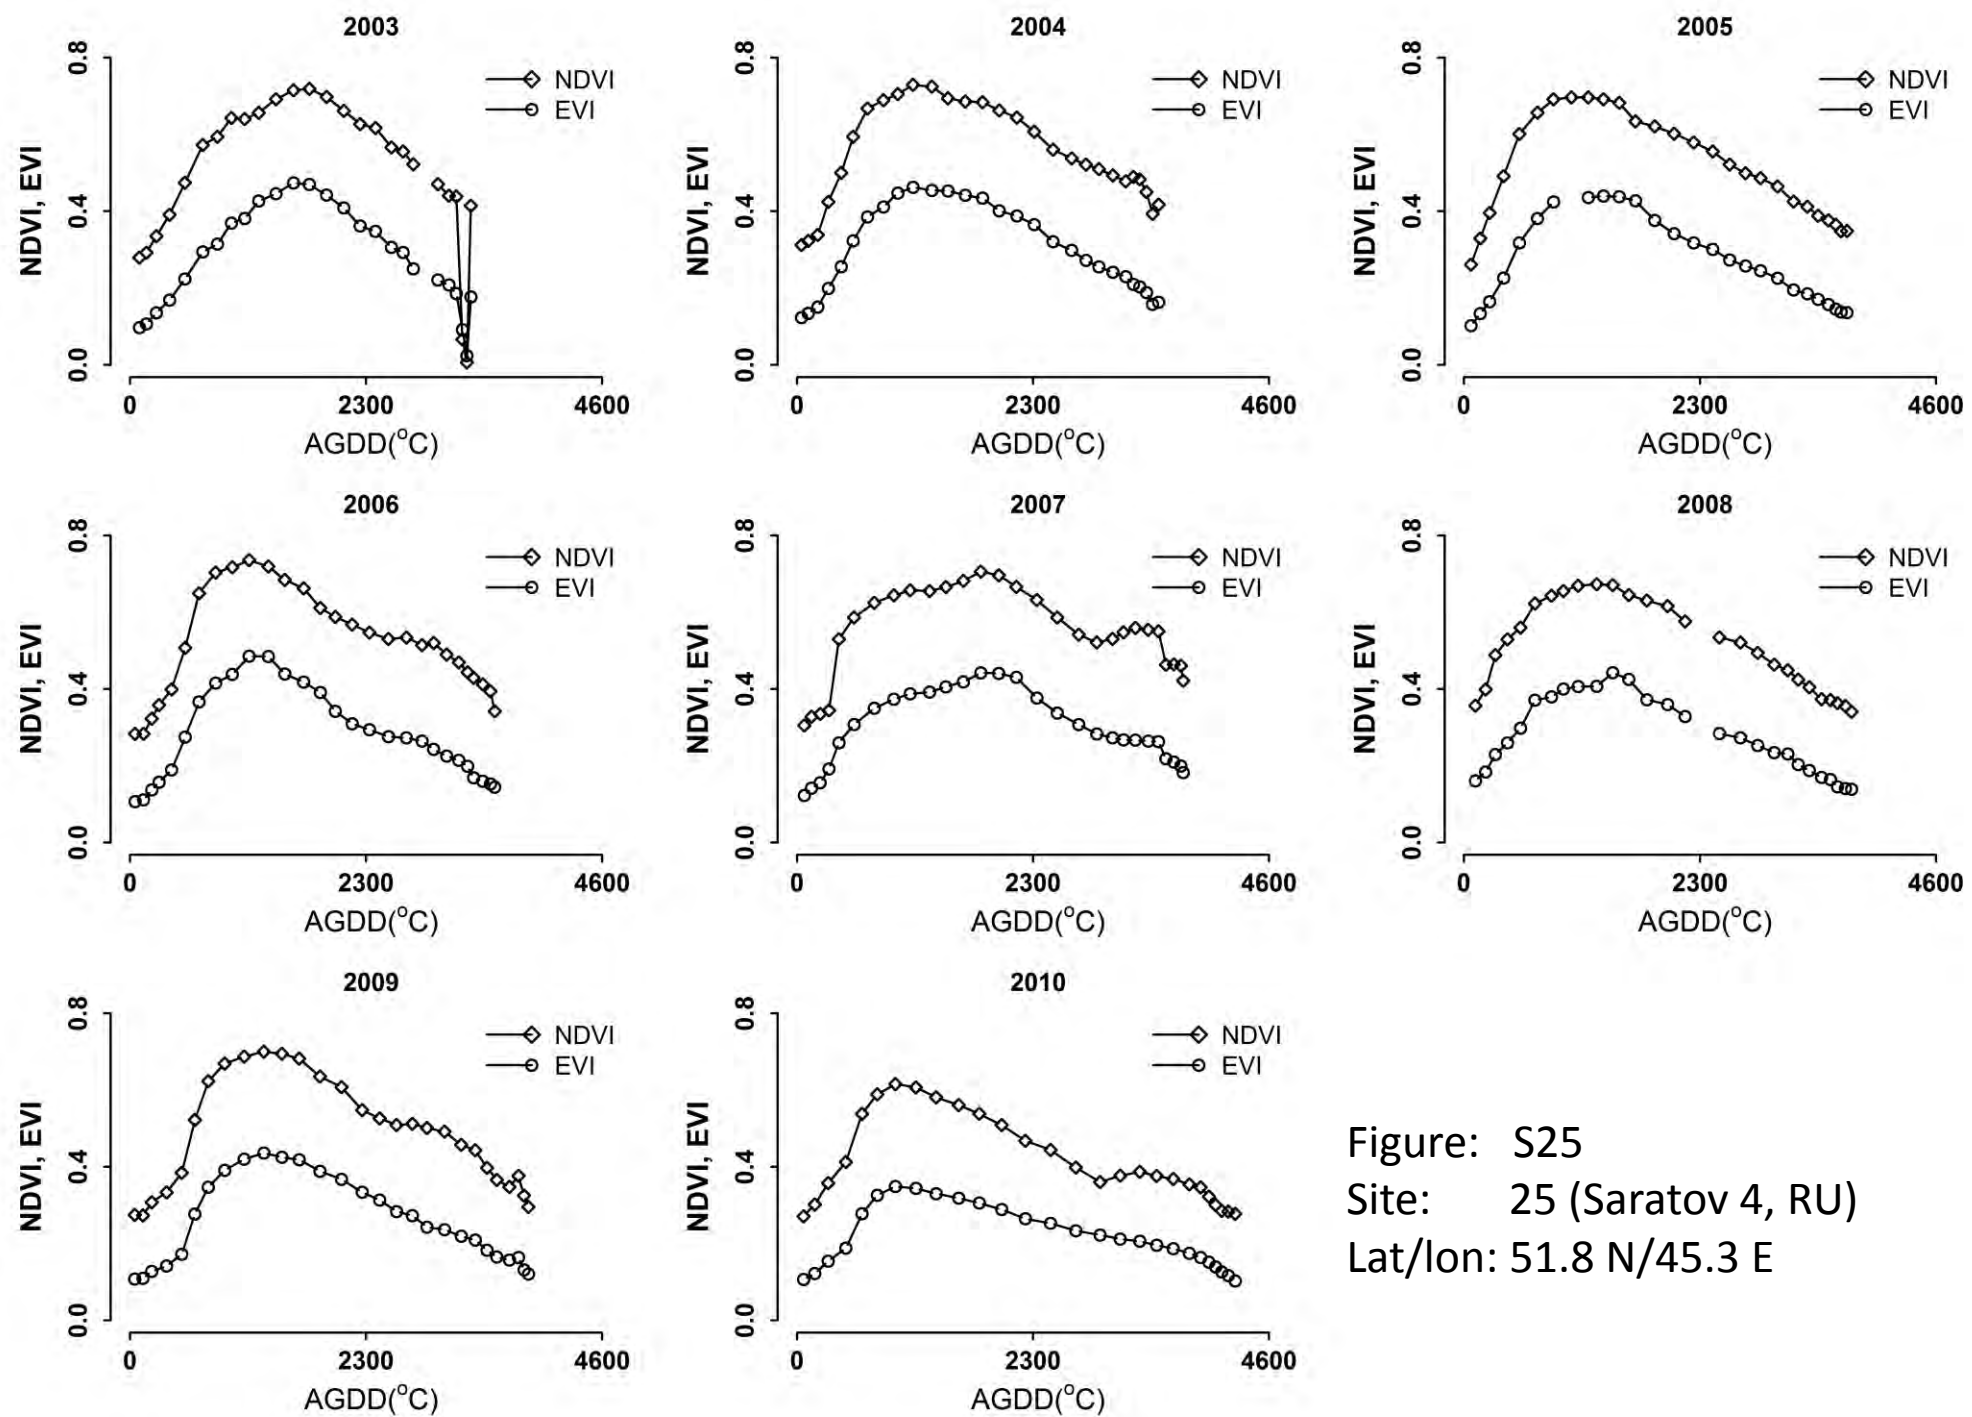

Figure: S25  
Site: 25 (Saratov 4, RU)  
Lat/Ion: 51.8 N/45.3 E

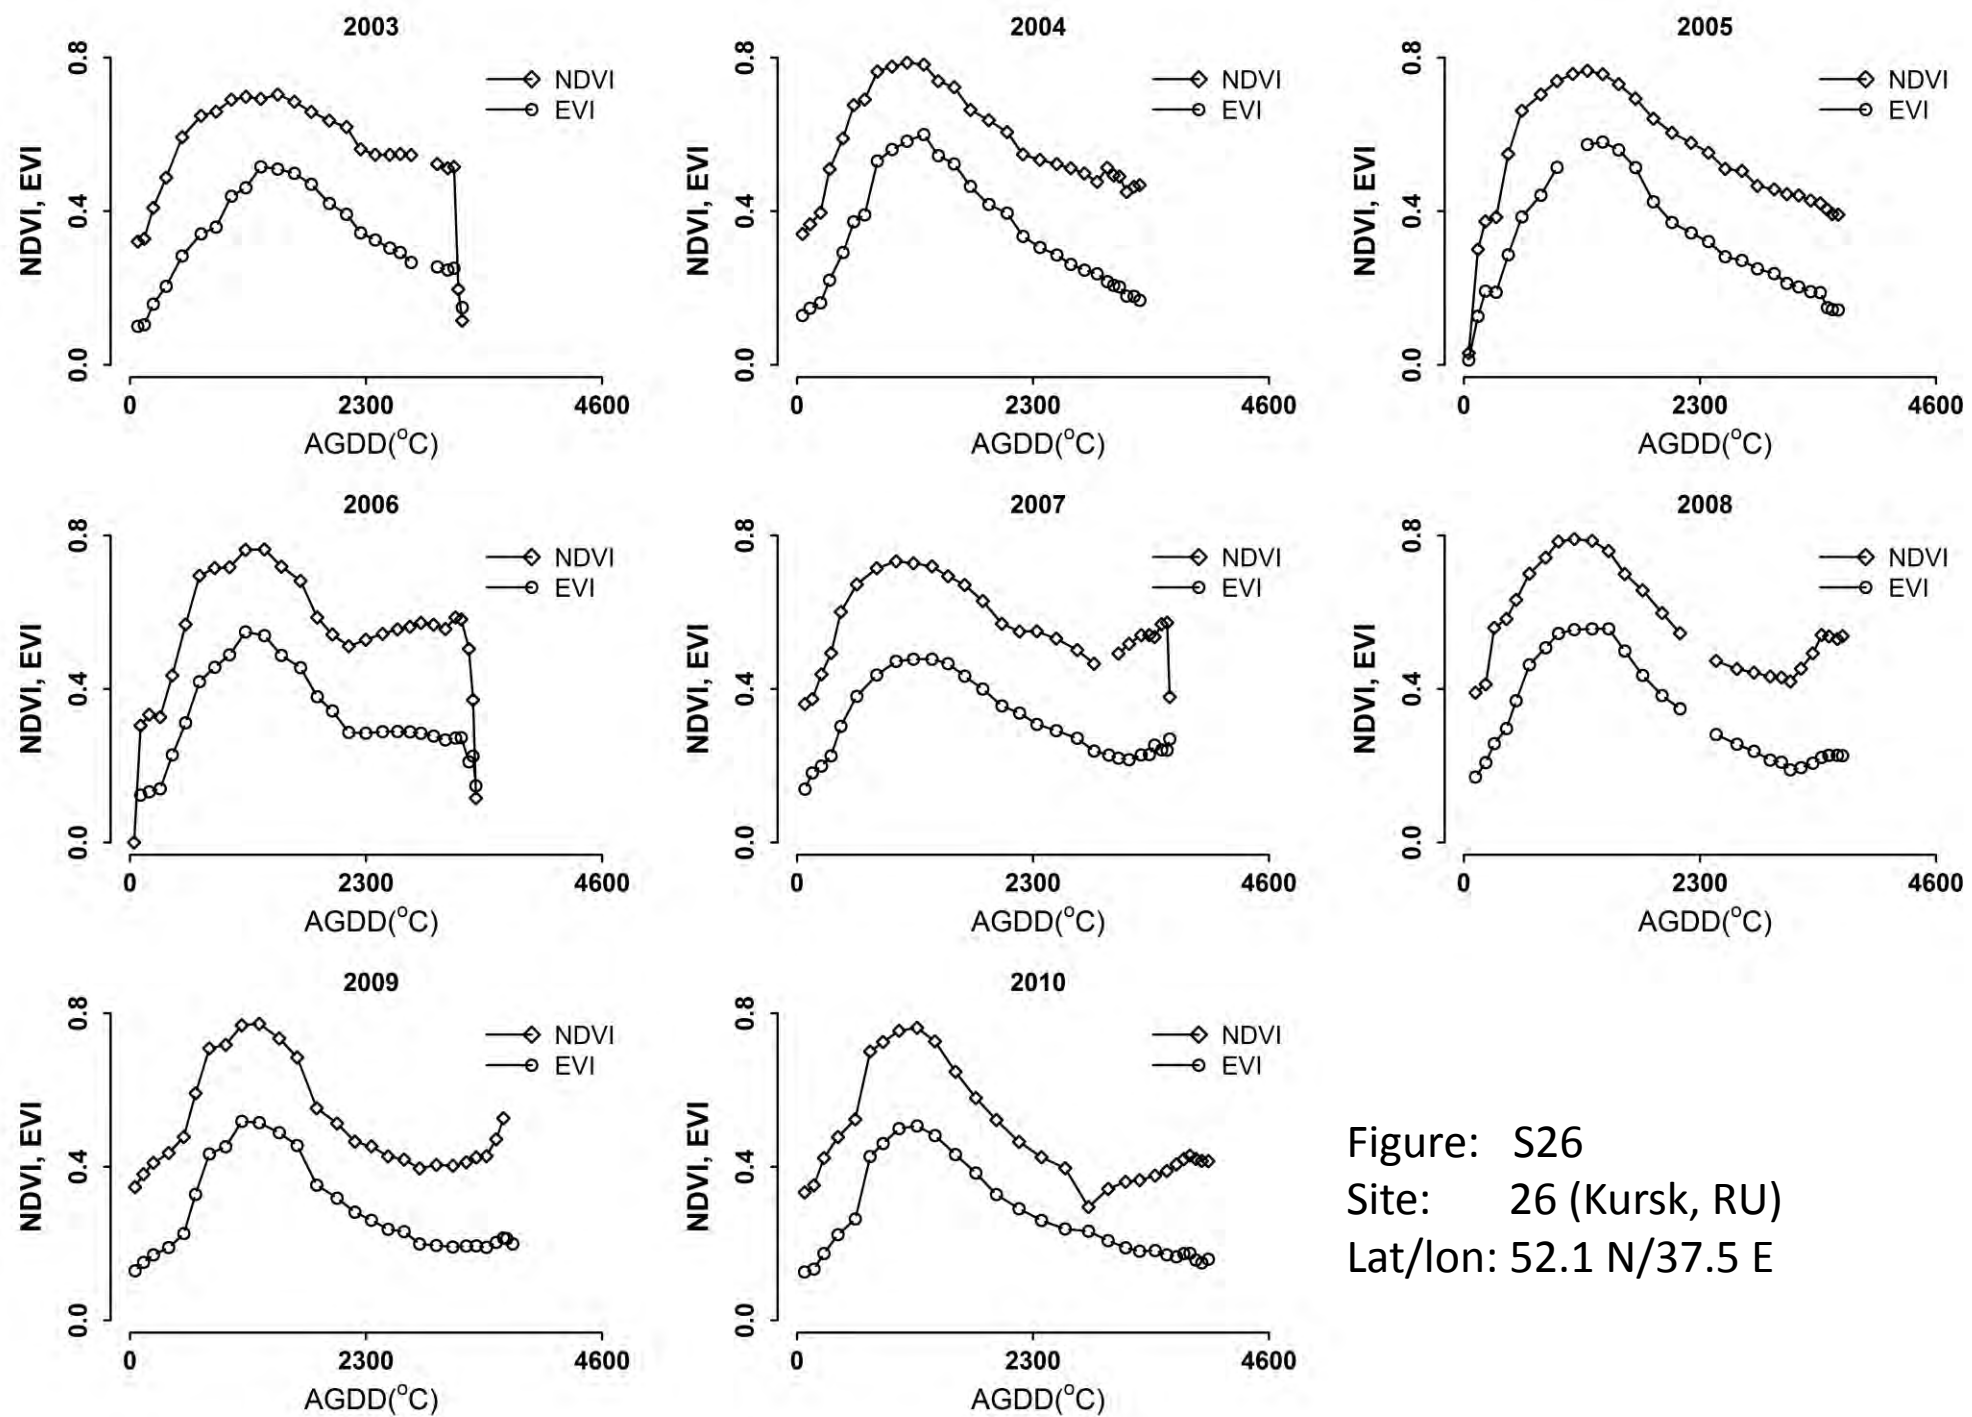

Figure: S26  
 Site: 26 (Kursk, RU)  
 Lat/Ion: 52.1 N/37.5 E

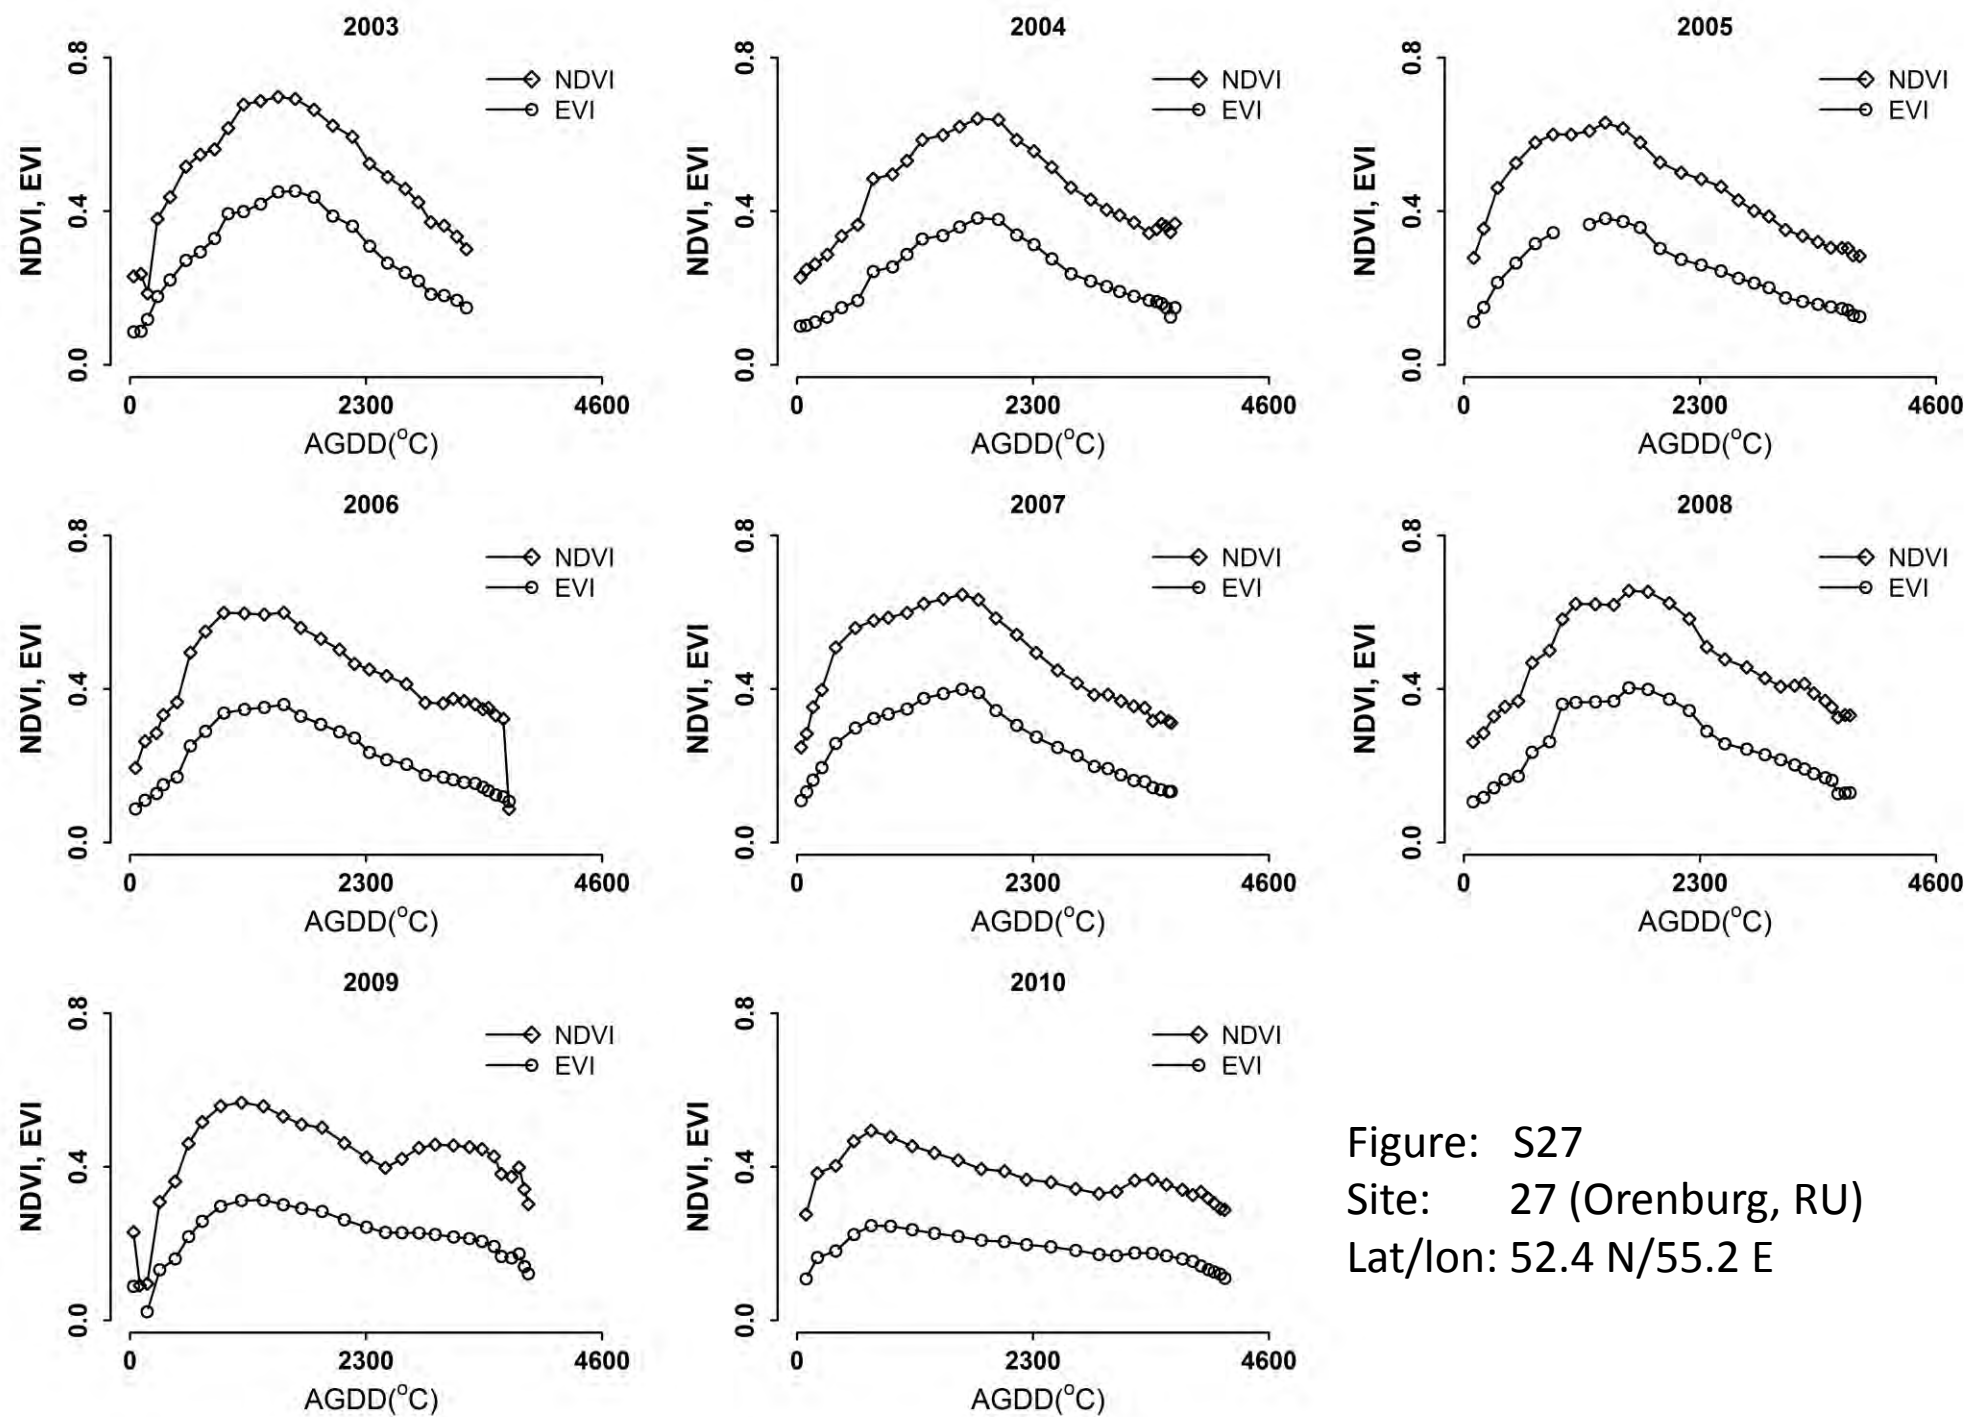

Figure: S27  
Site: 27 (Orenburg, RU)  
Lat/Ion: 52.4 N/55.2 E

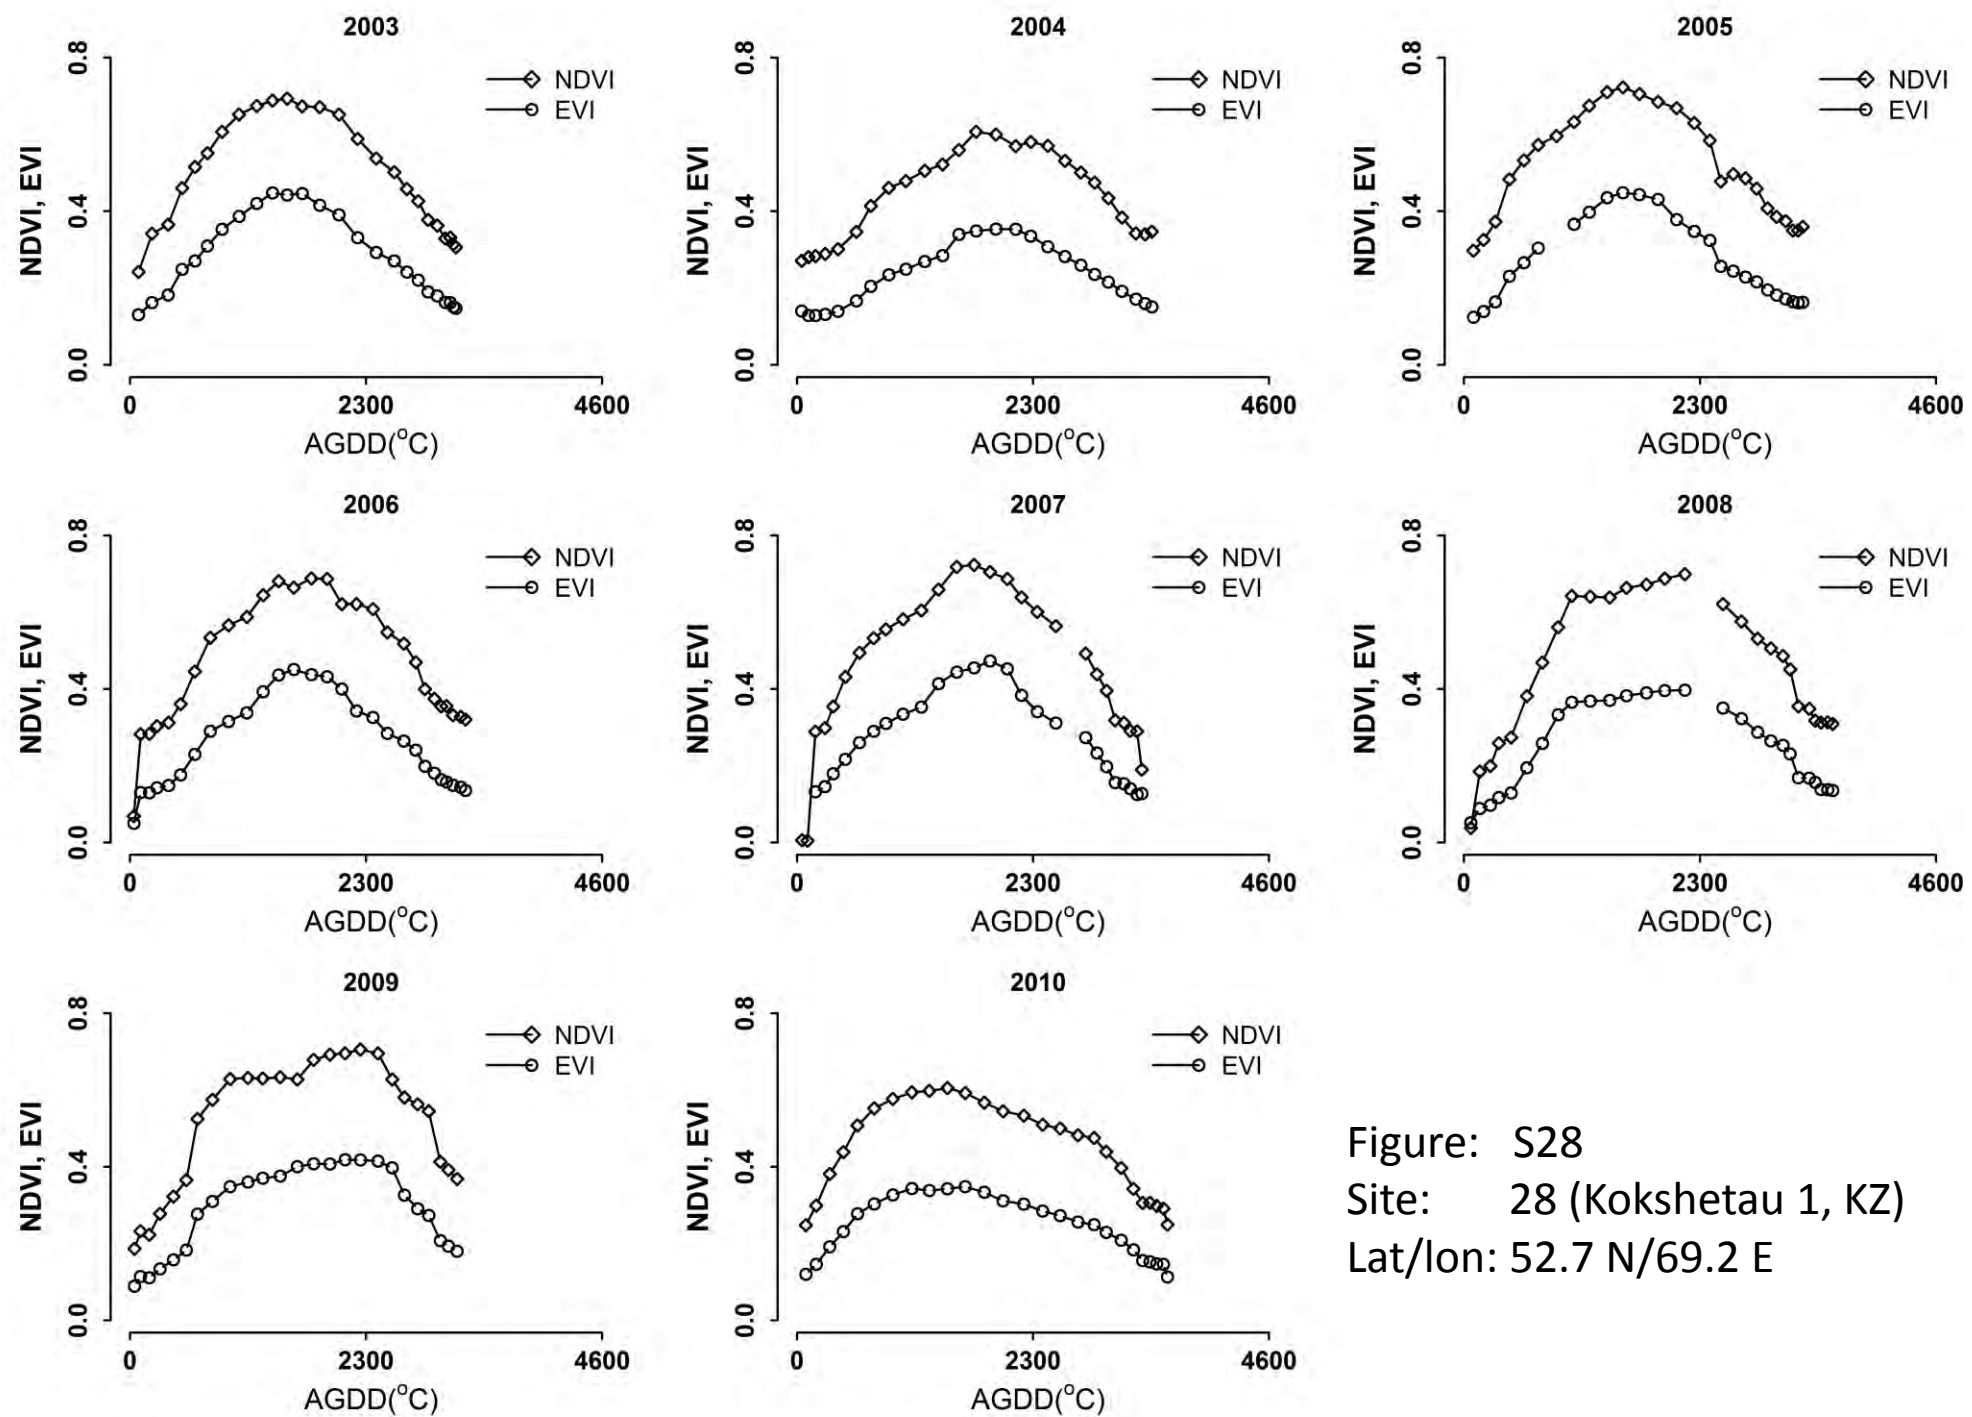

Figure: S28  
Site: 28 (Kokshetau 1, KZ)  
Lat/lon: 52.7 N/69.2 E

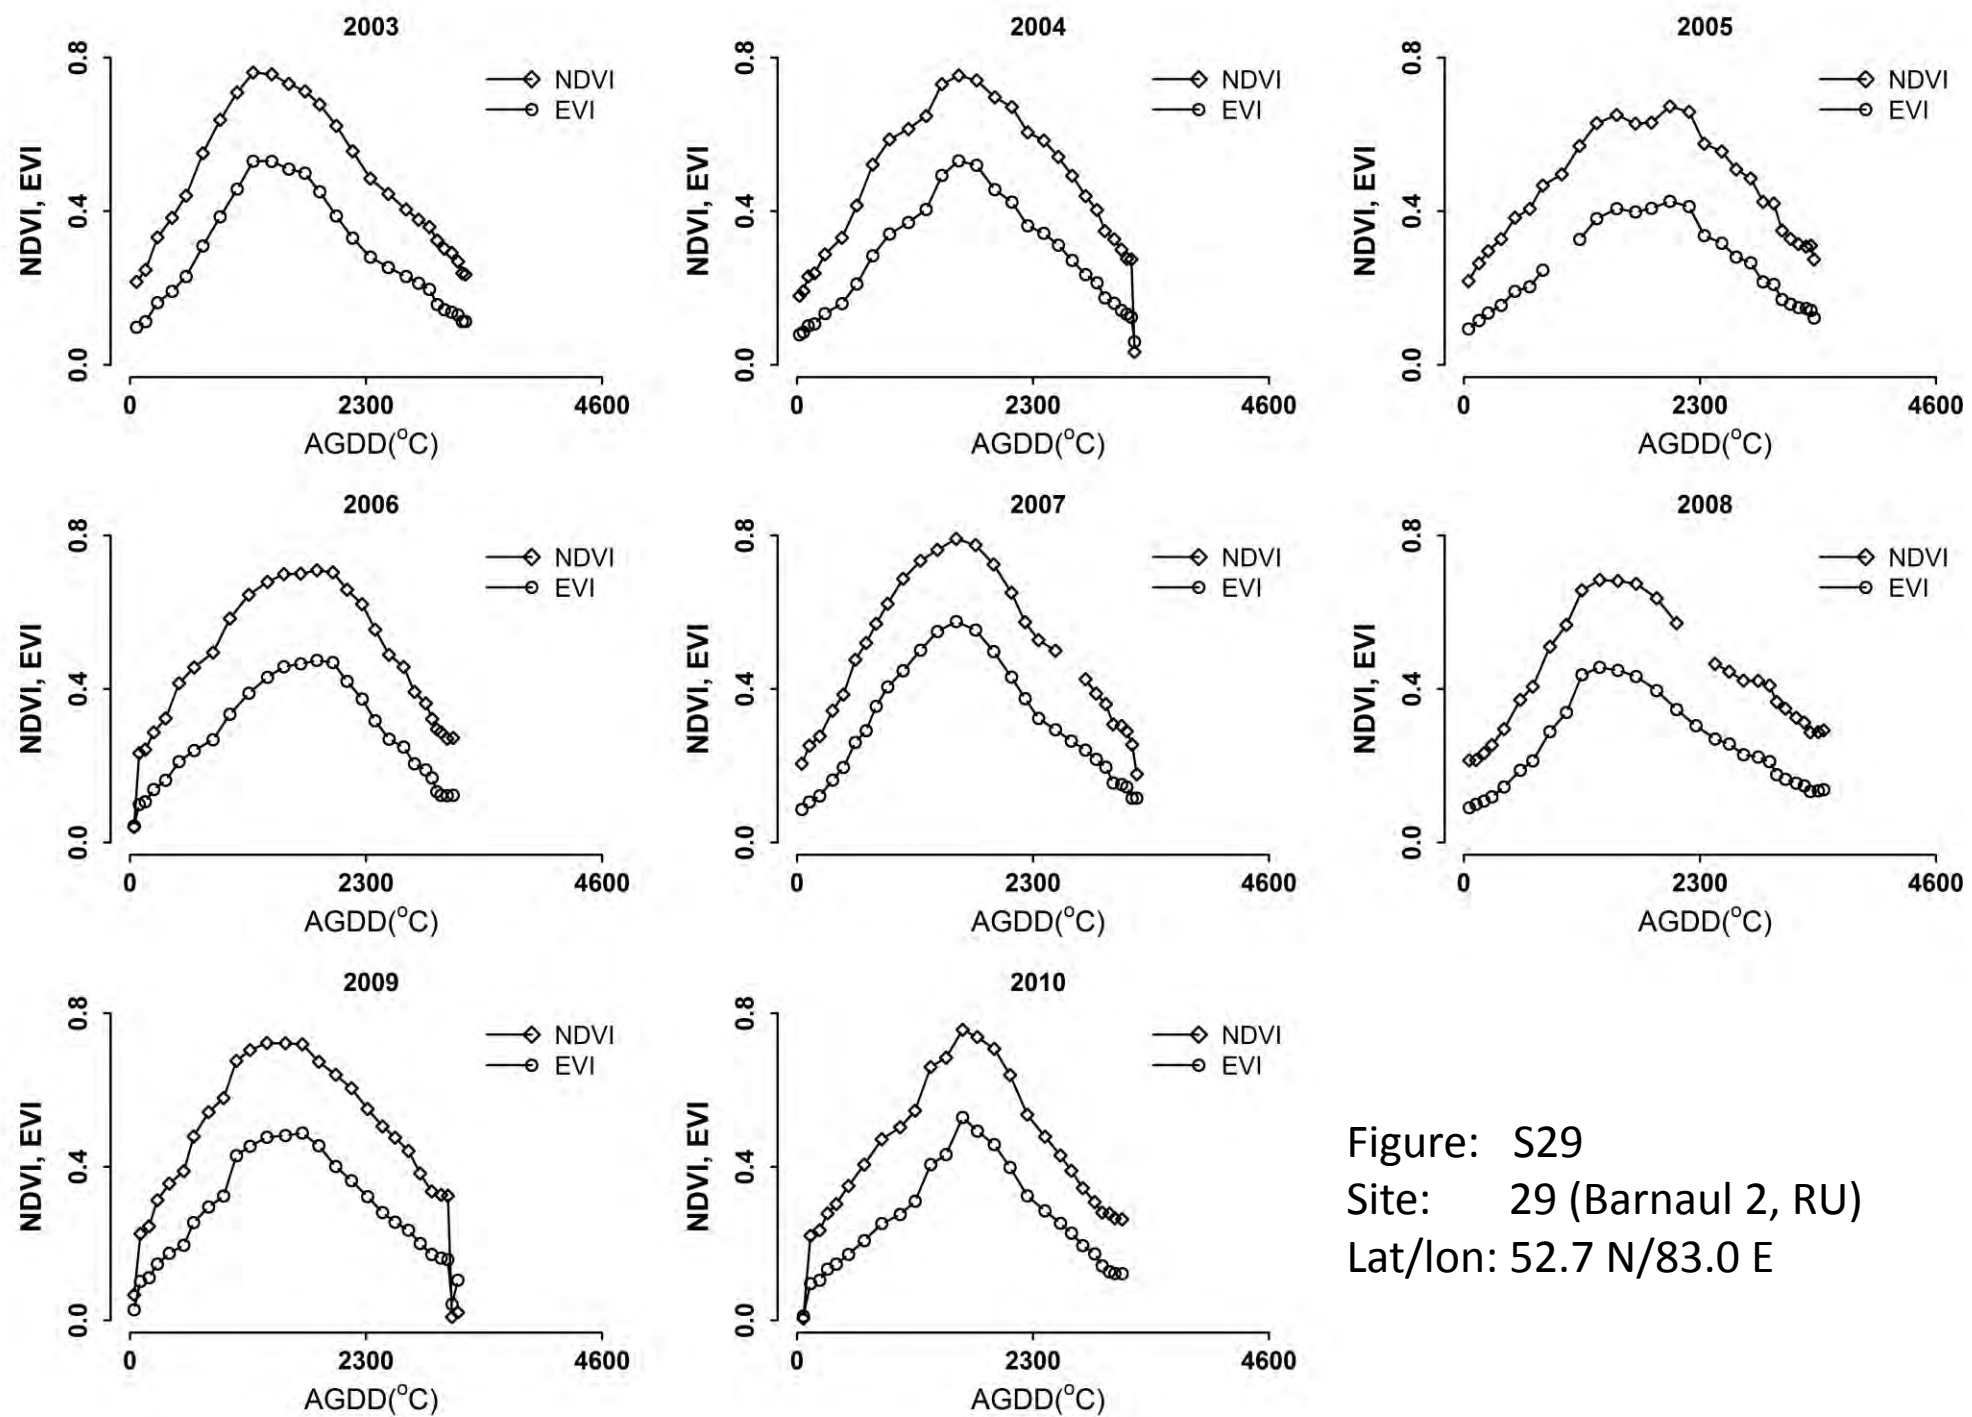

Figure: S29  
Site: 29 (Barnaul 2, RU)  
Lat/Ion: 52.7 N/83.0 E



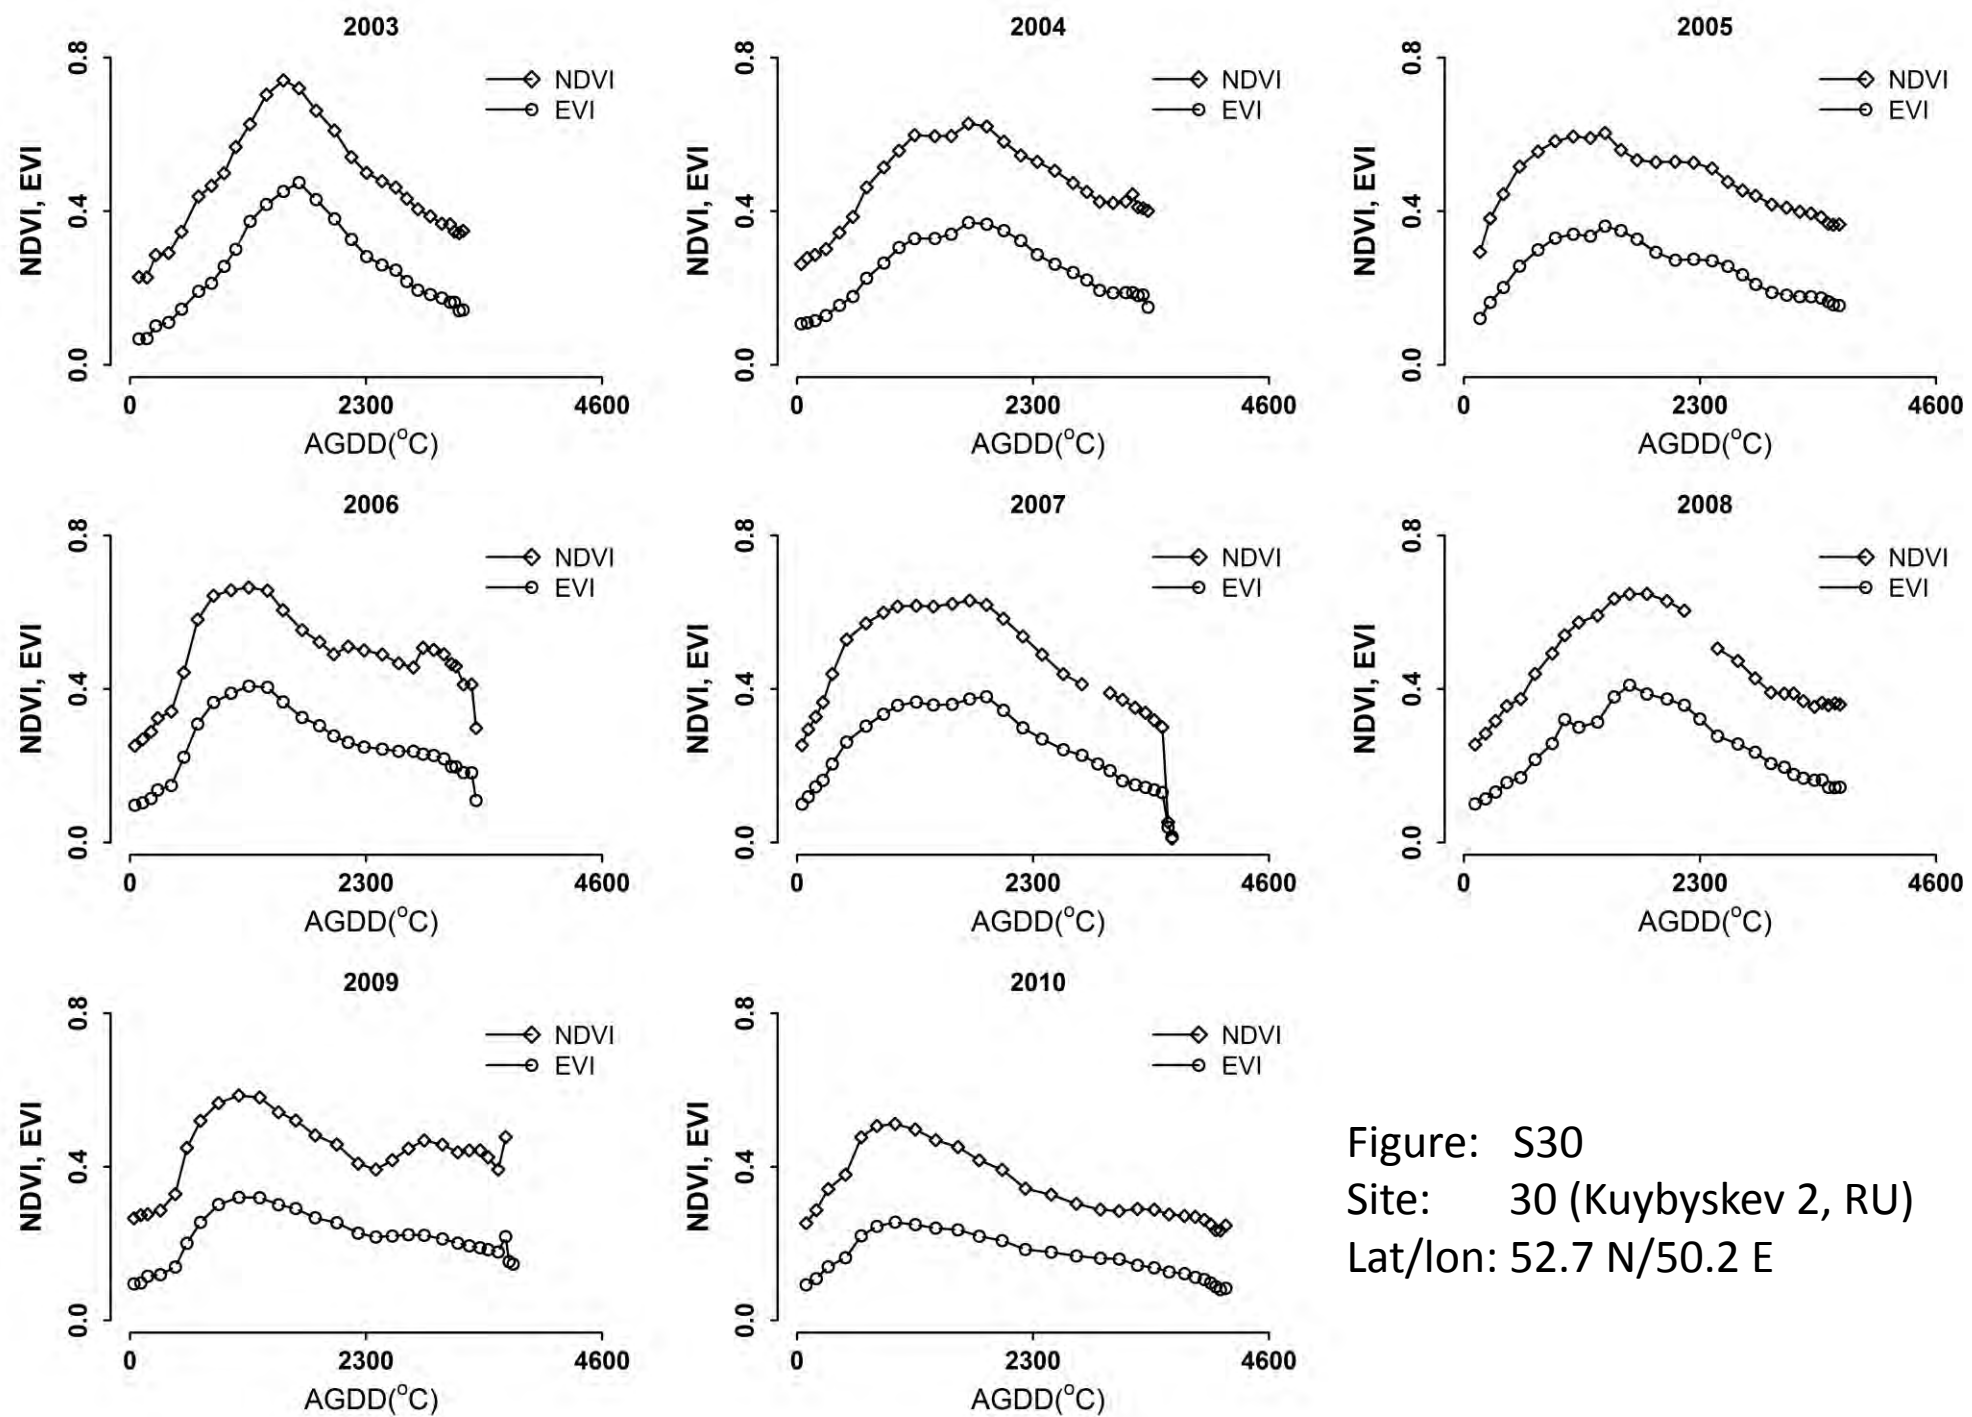

Figure: S30  
 Site: 30 (Kuybyshev 2, RU)  
 Lat/Ion: 52.7 N/50.2 E

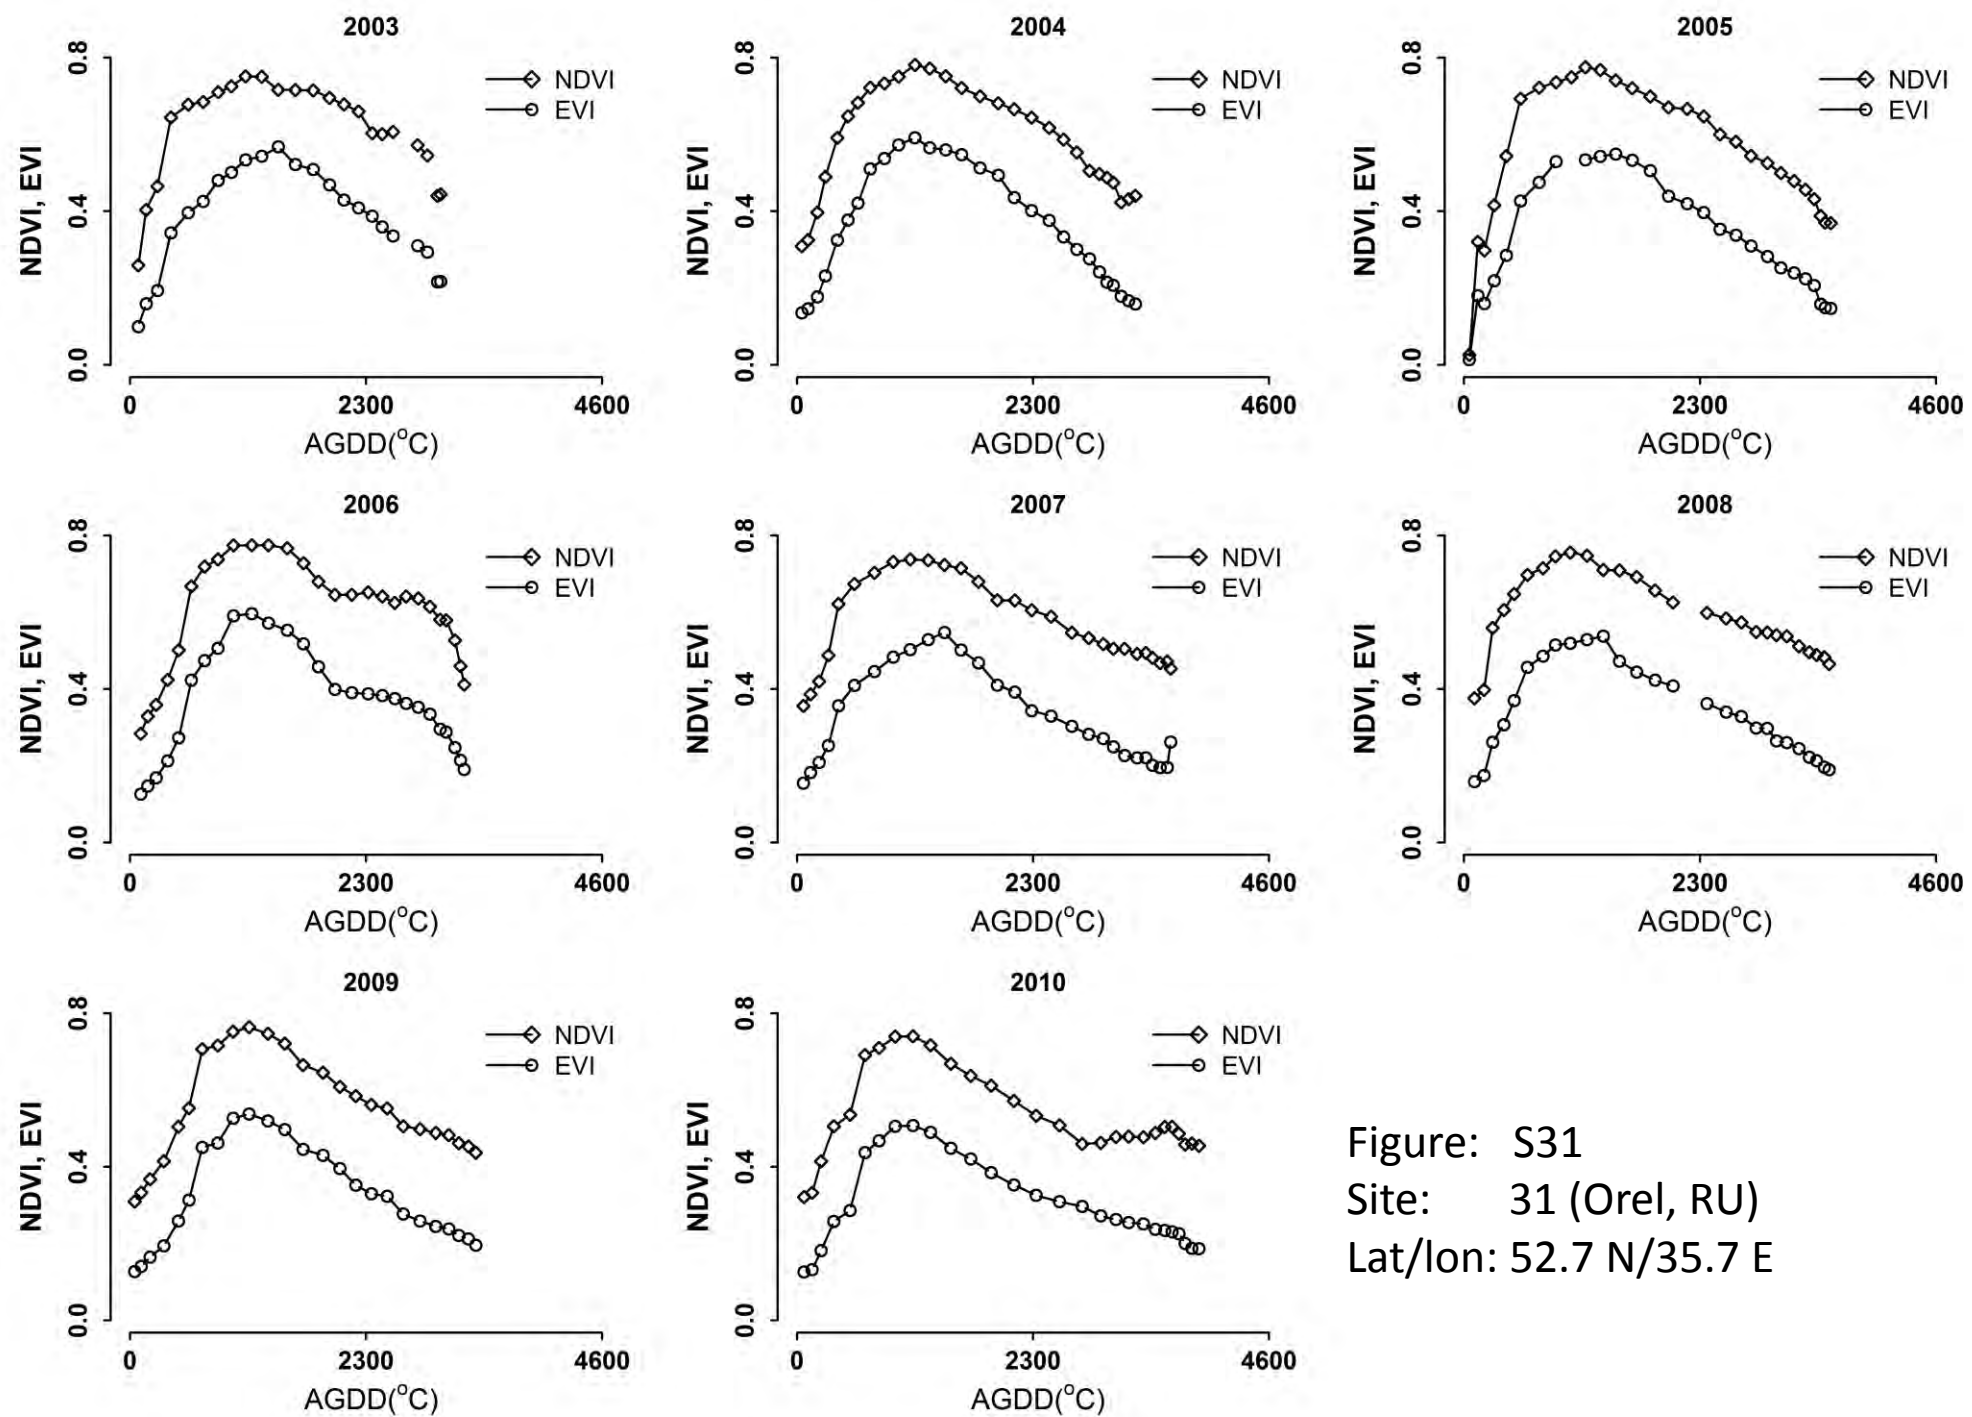

Figure: S31  
 Site: 31 (Orel, RU)  
 Lat/lon: 52.7 N/35.7 E

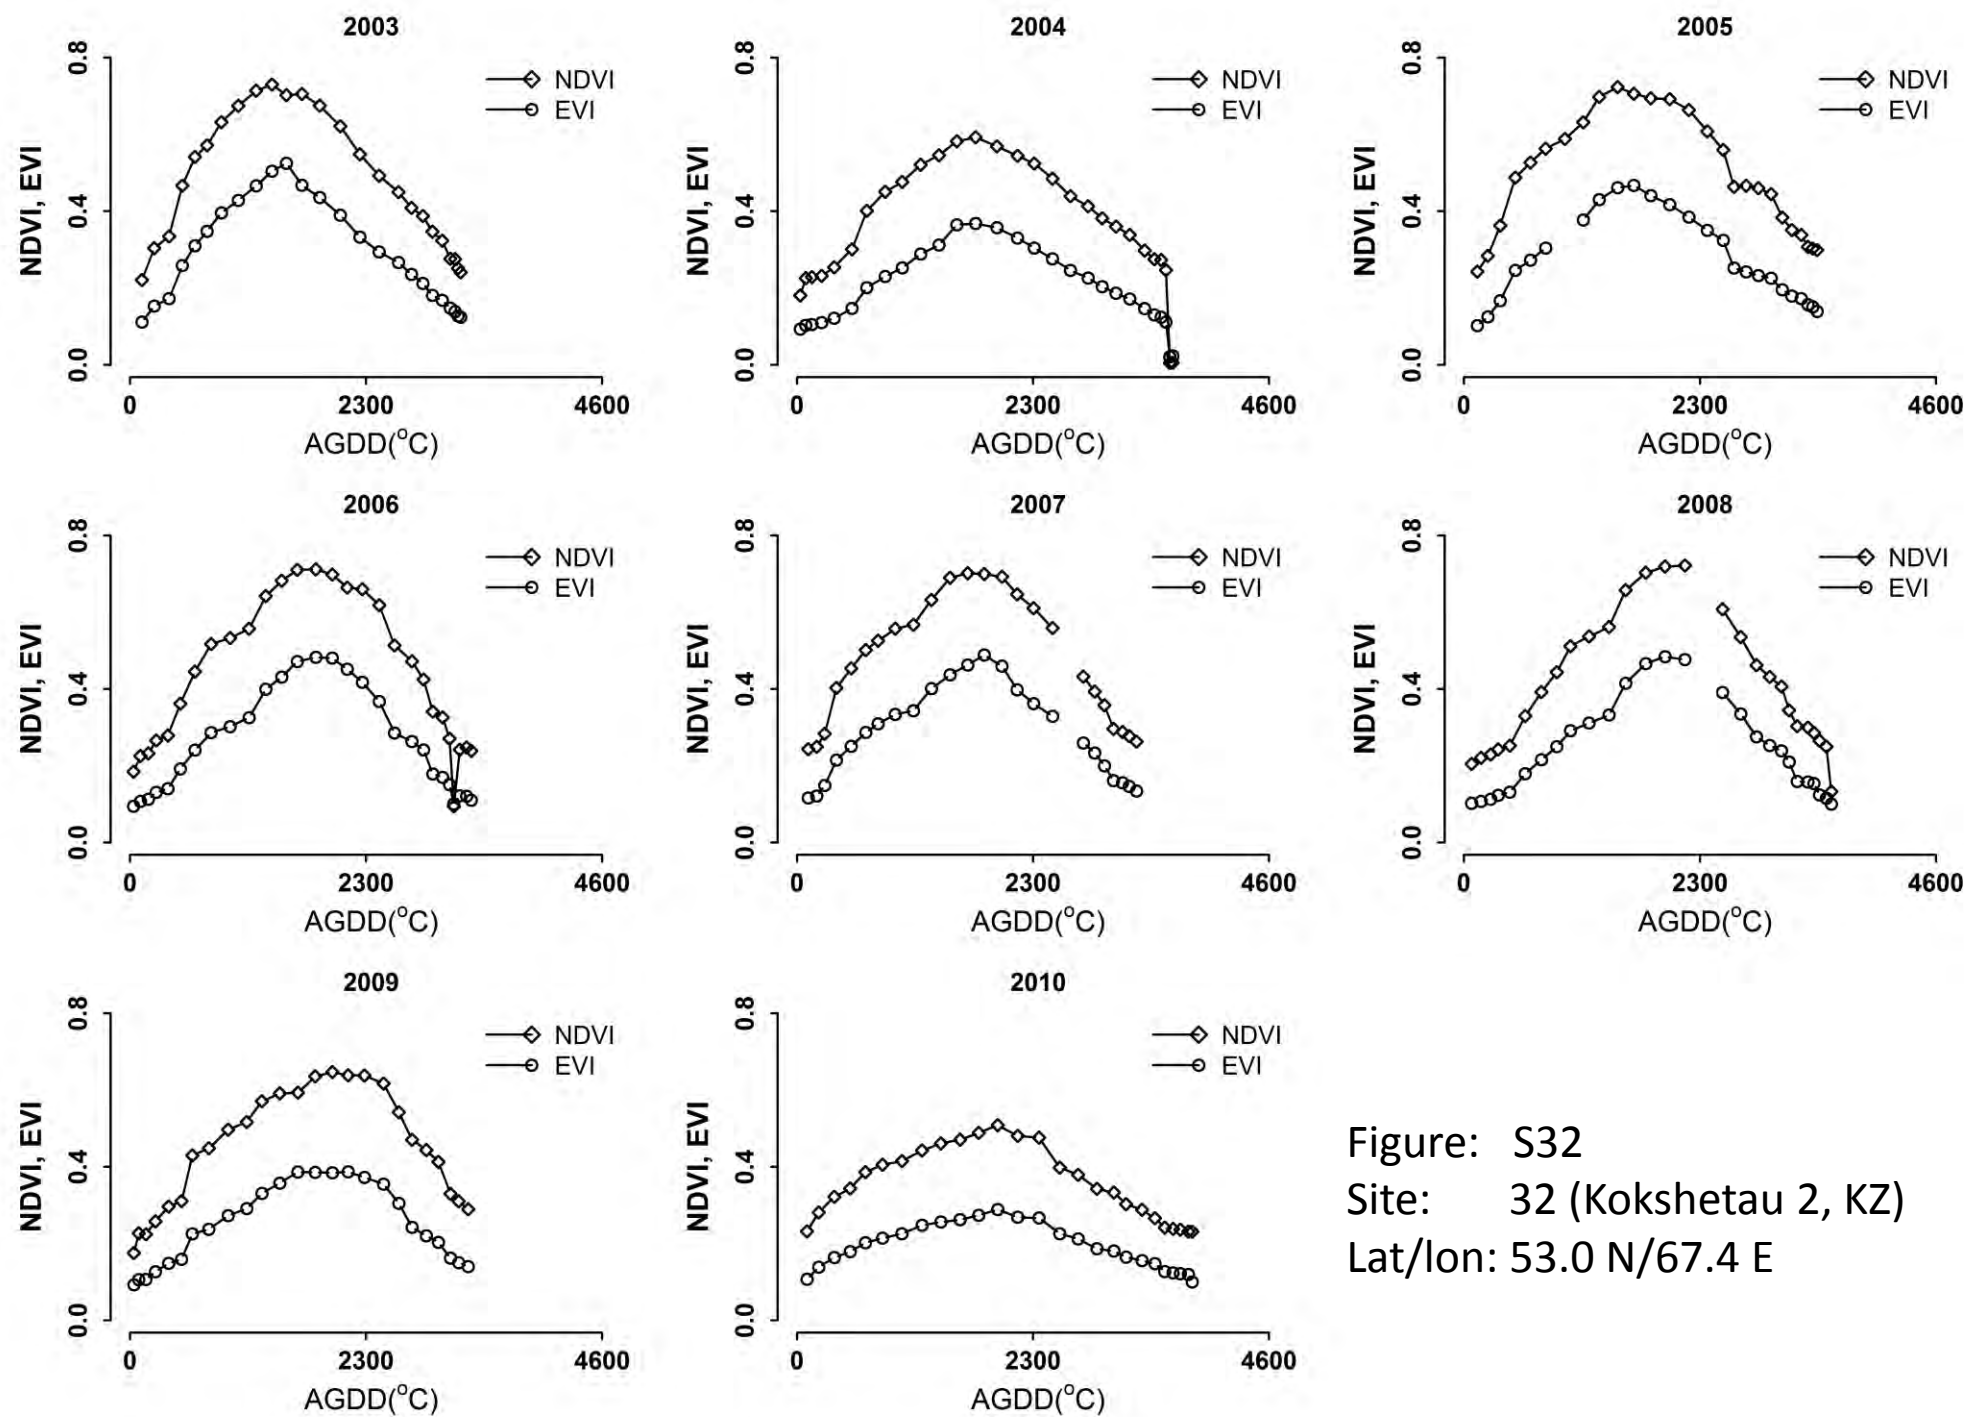

Figure: S32  
 Site: 32 (Kokshetau 2, KZ)  
 Lat/Ion: 53.0 N/67.4 E

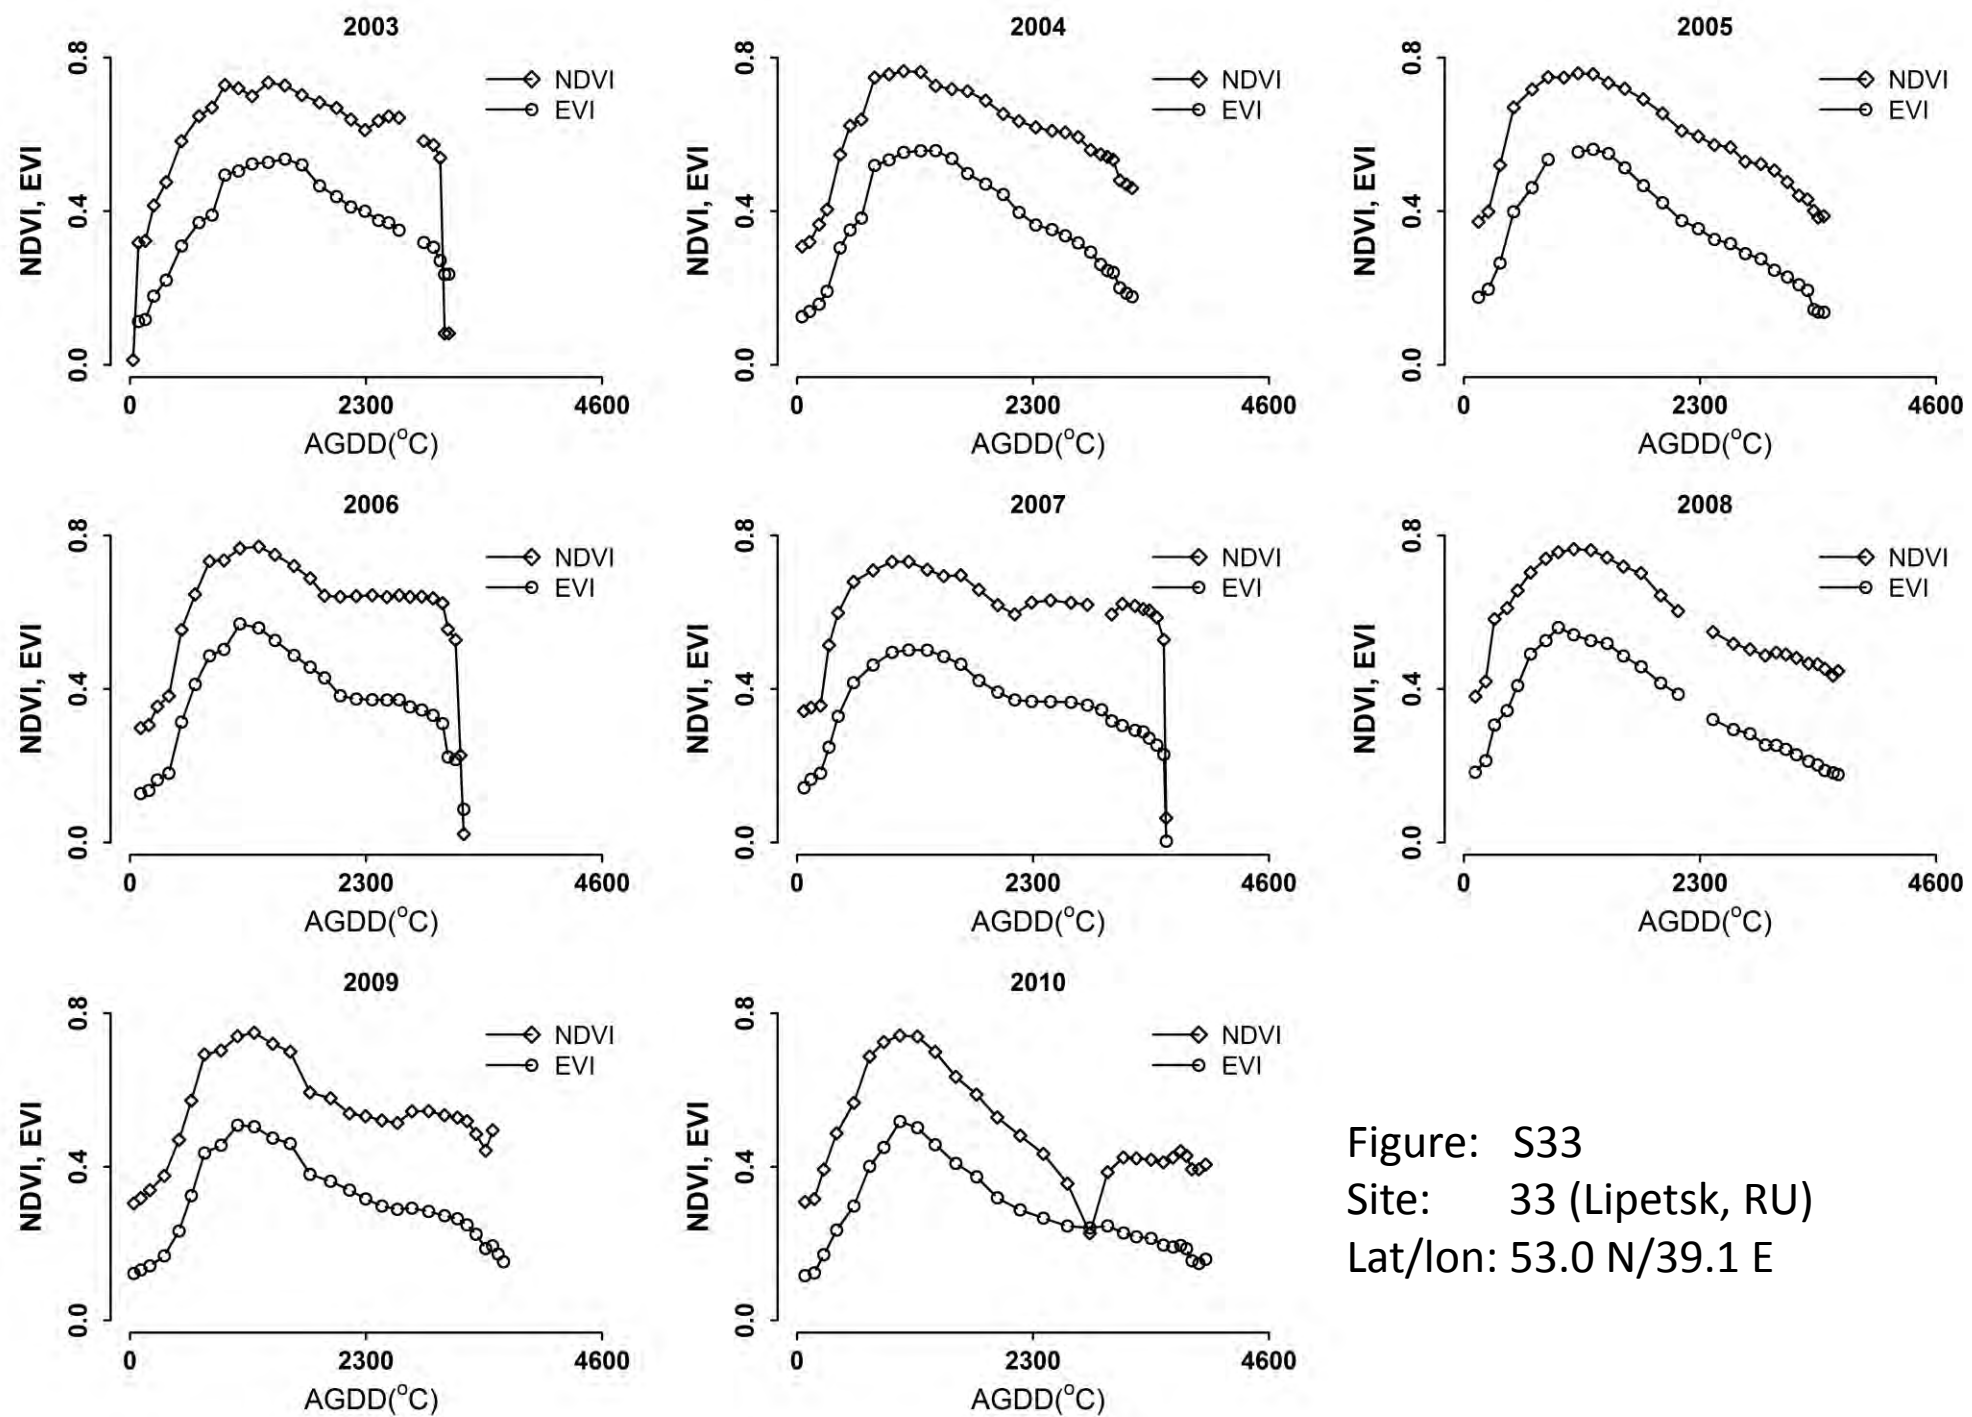

Figure: S33  
 Site: 33 (Lipetsk, RU)  
 Lat/Ion: 53.0 N/39.1 E

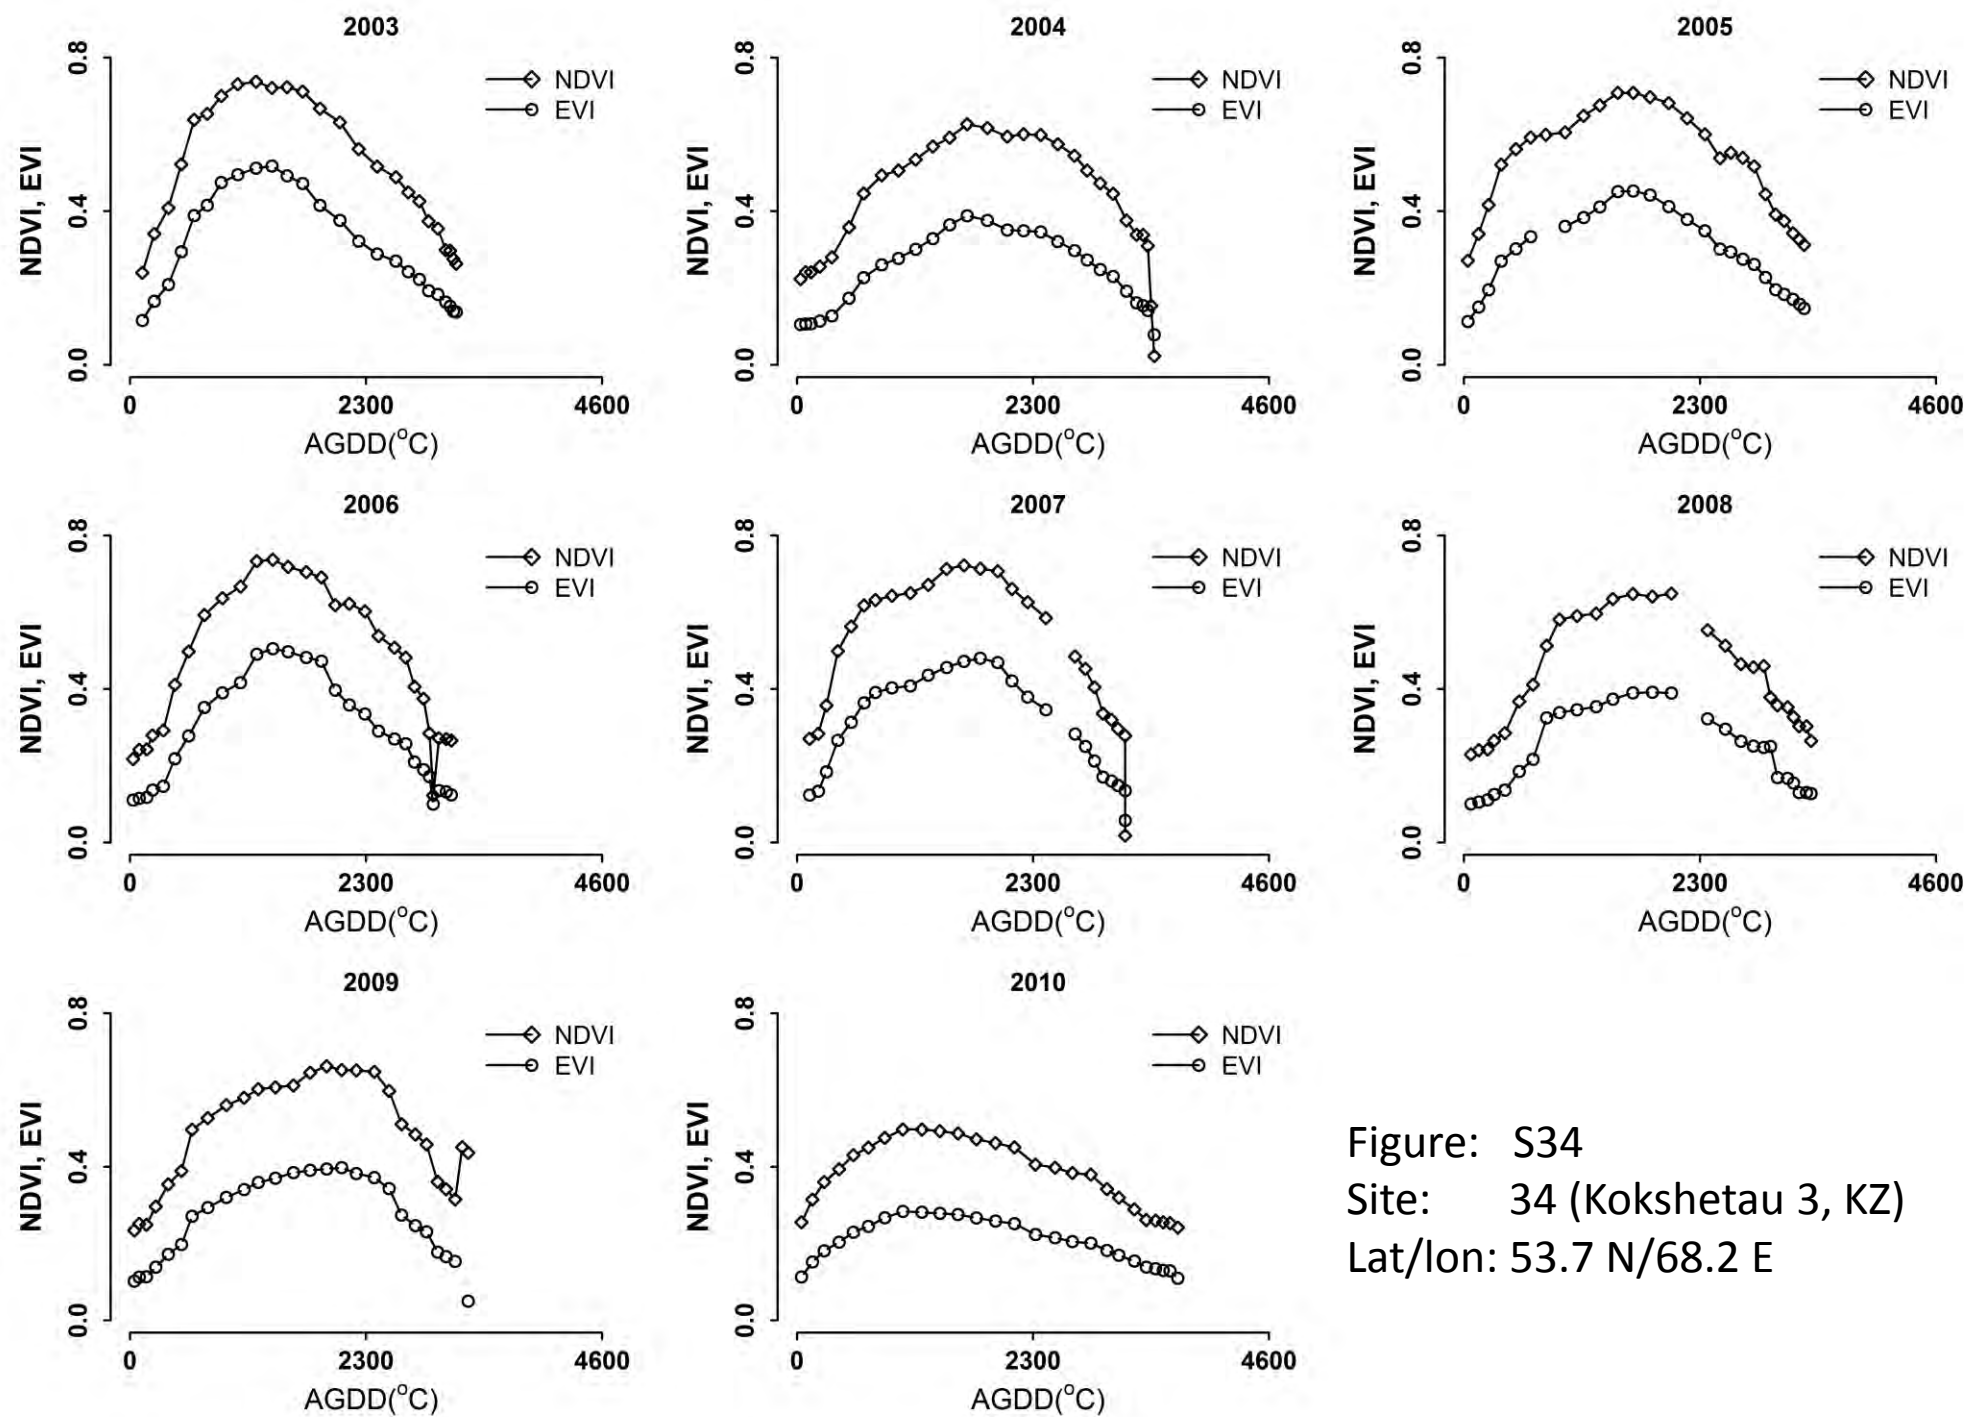

Figure: S34  
 Site: 34 (Kokshetau 3, KZ)  
 Lat/Ion: 53.7 N/68.2 E

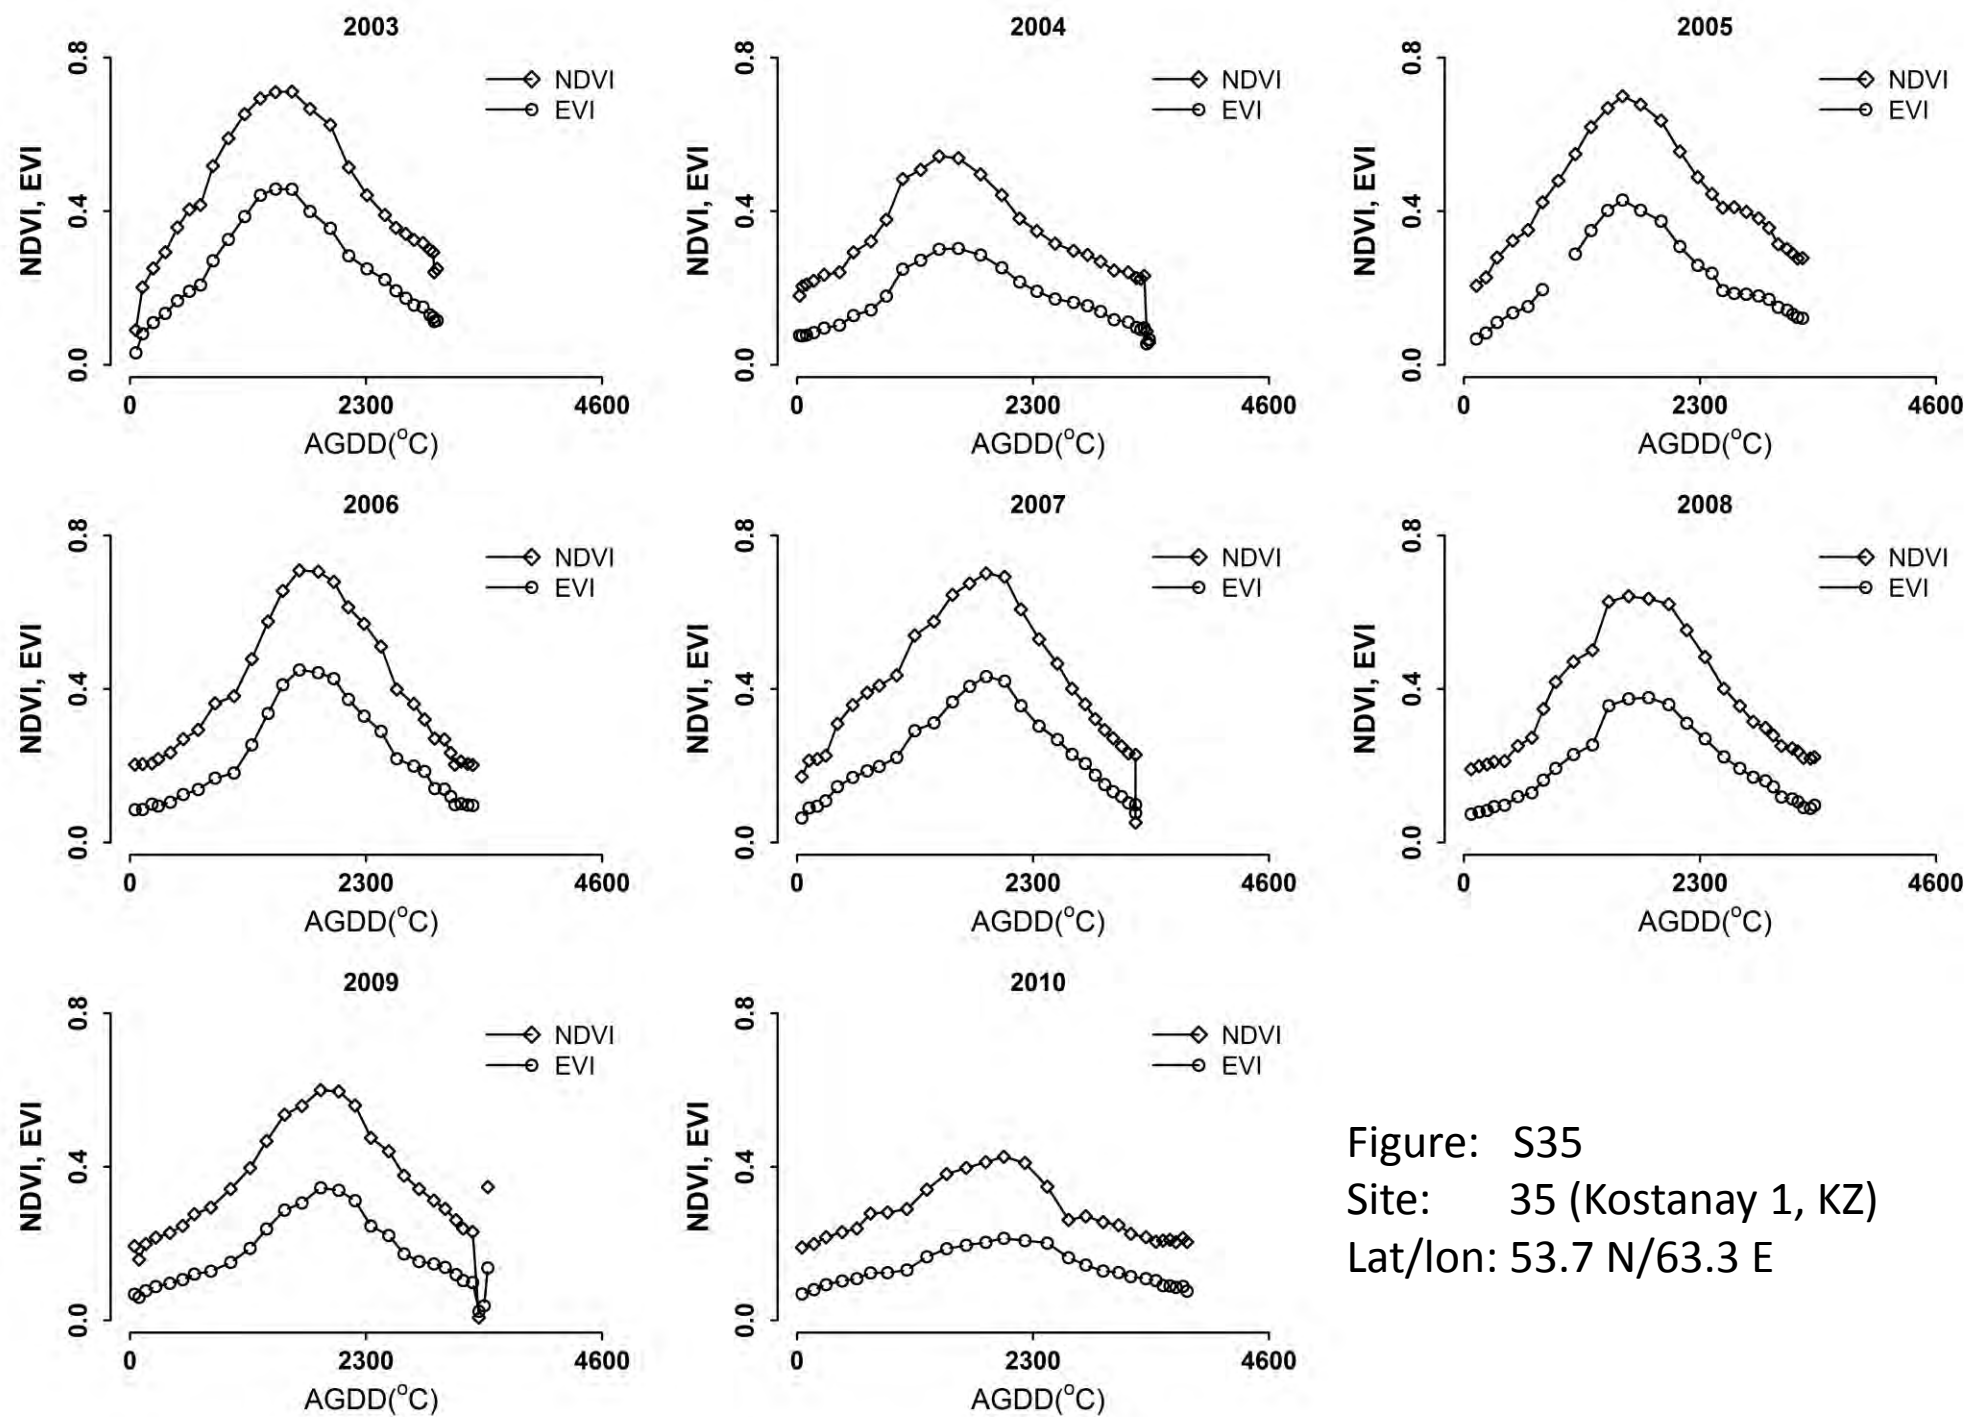

Figure: S35  
 Site: 35 (Kostanay 1, KZ)  
 Lat/lon: 53.7 N/63.3 E

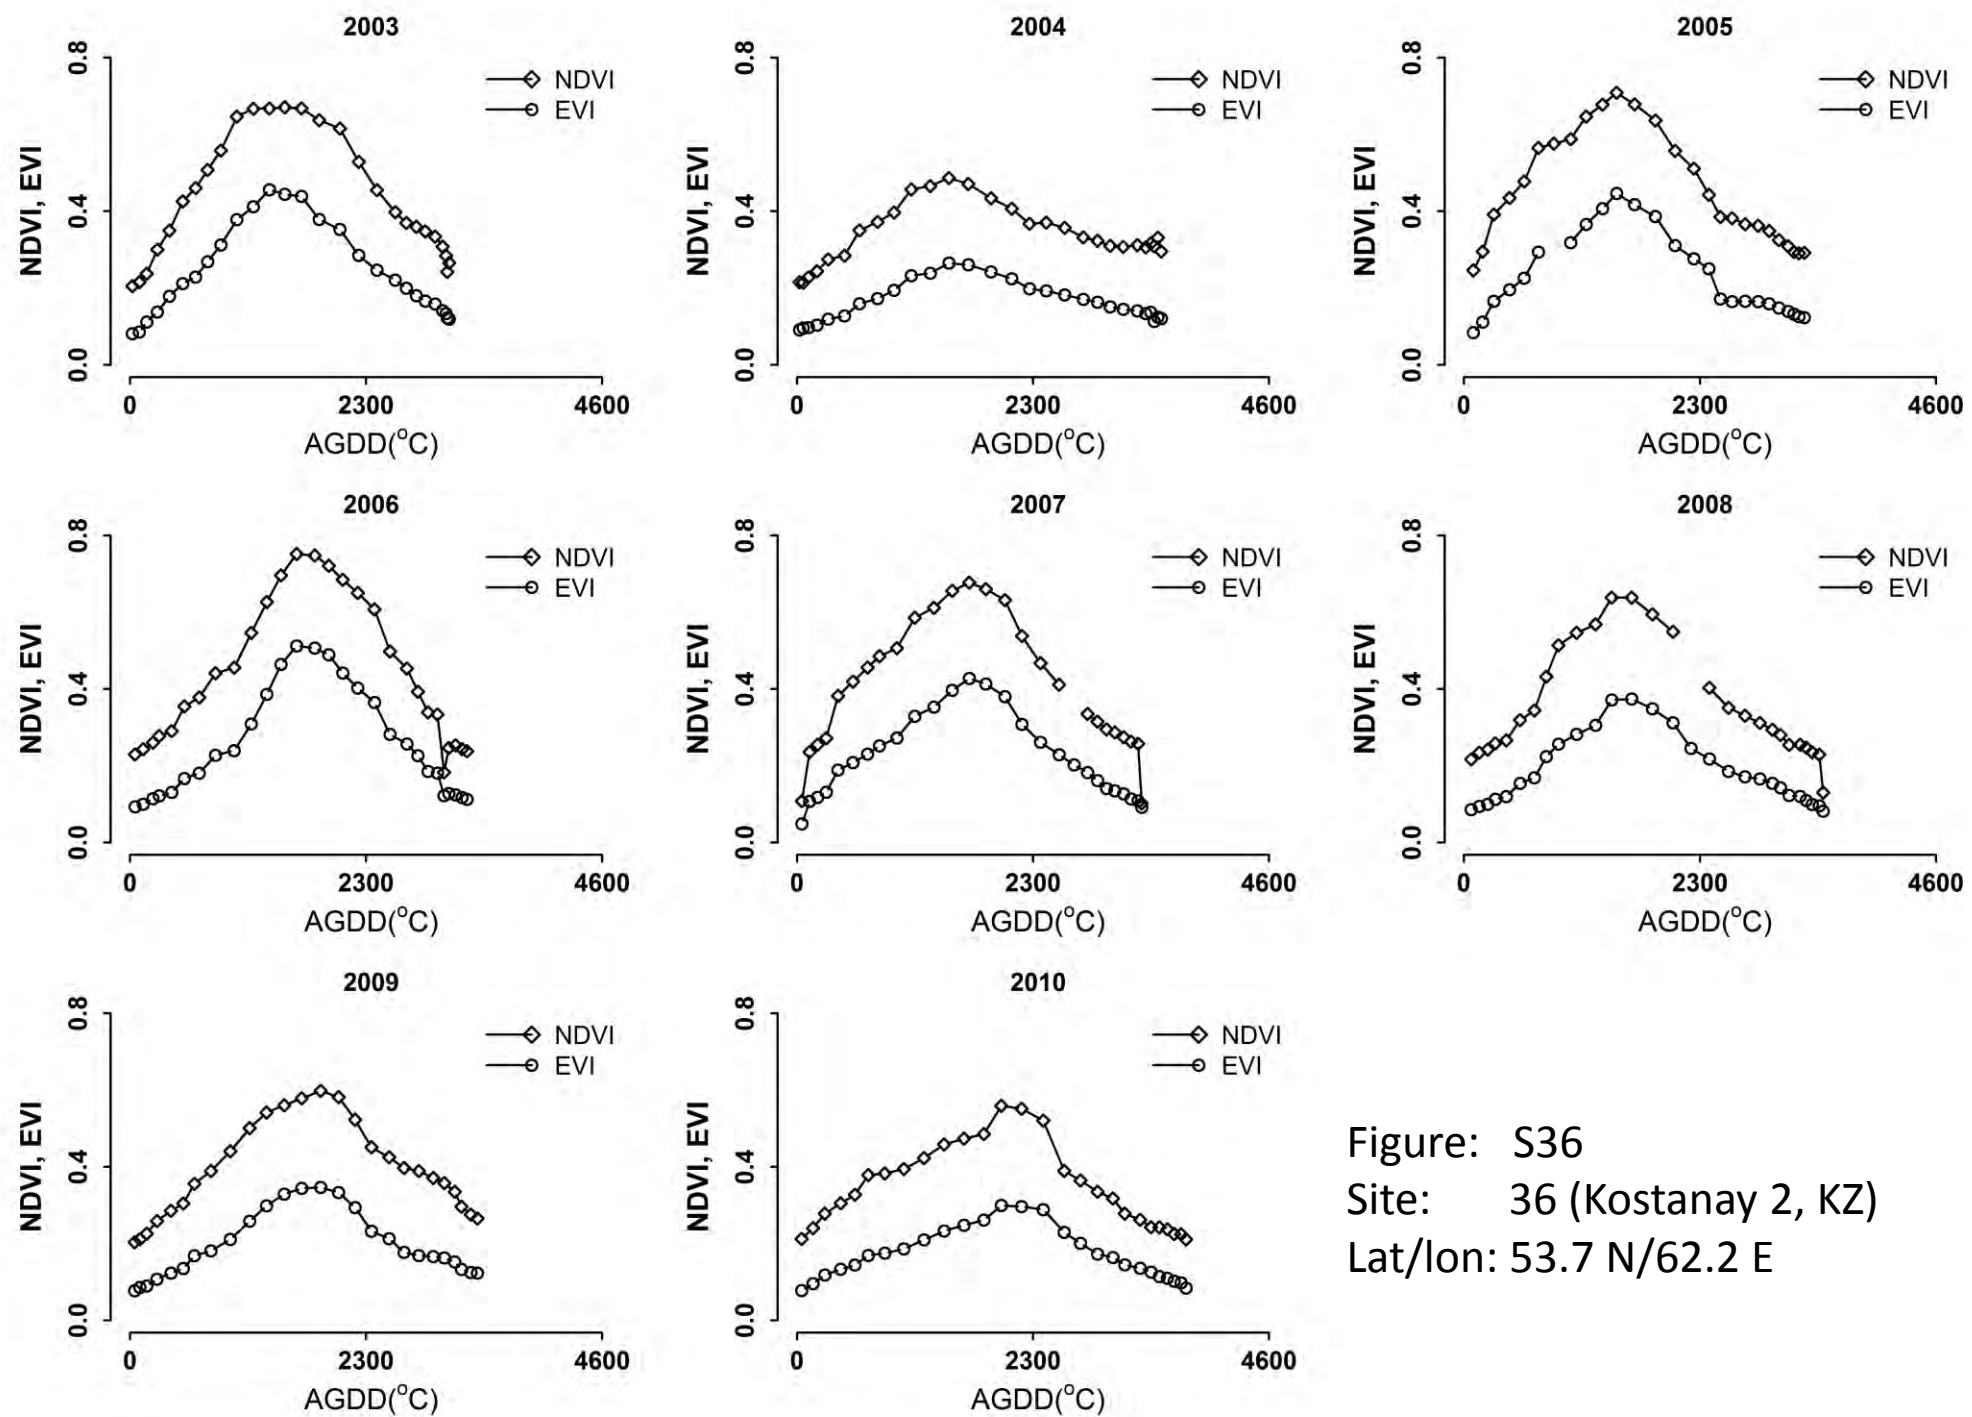

Figure: S36  
Site: 36 (Kostanay 2, KZ)  
Lat/Ion: 53.7 N/62.2 E



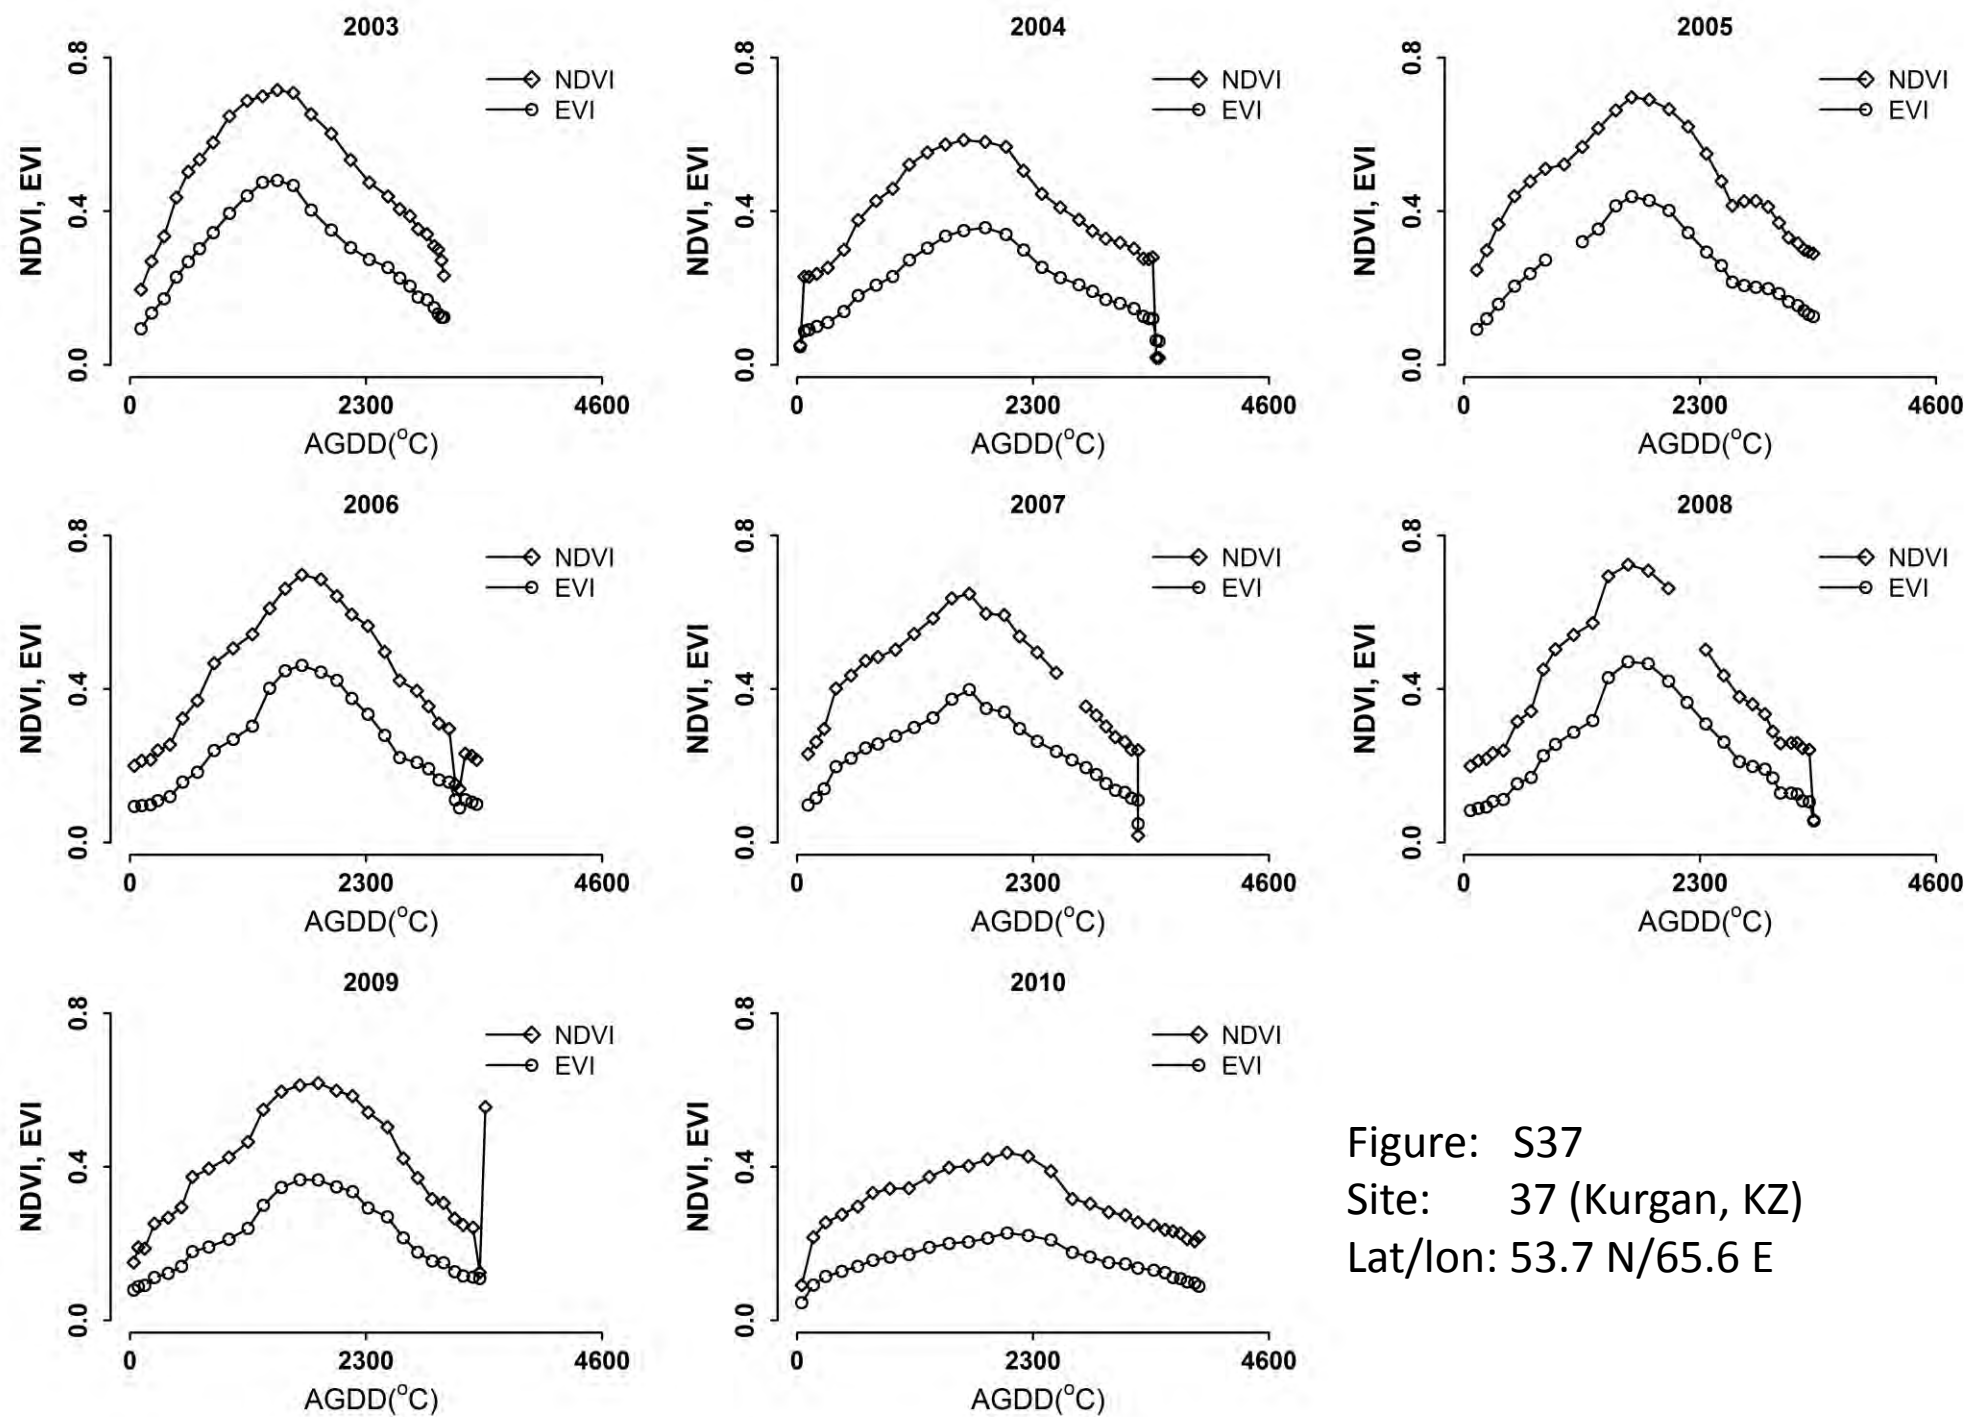

Figure: S37  
Site: 37 (Kurgan, KZ)  
Lat/Ion: 53.7 N/65.6 E

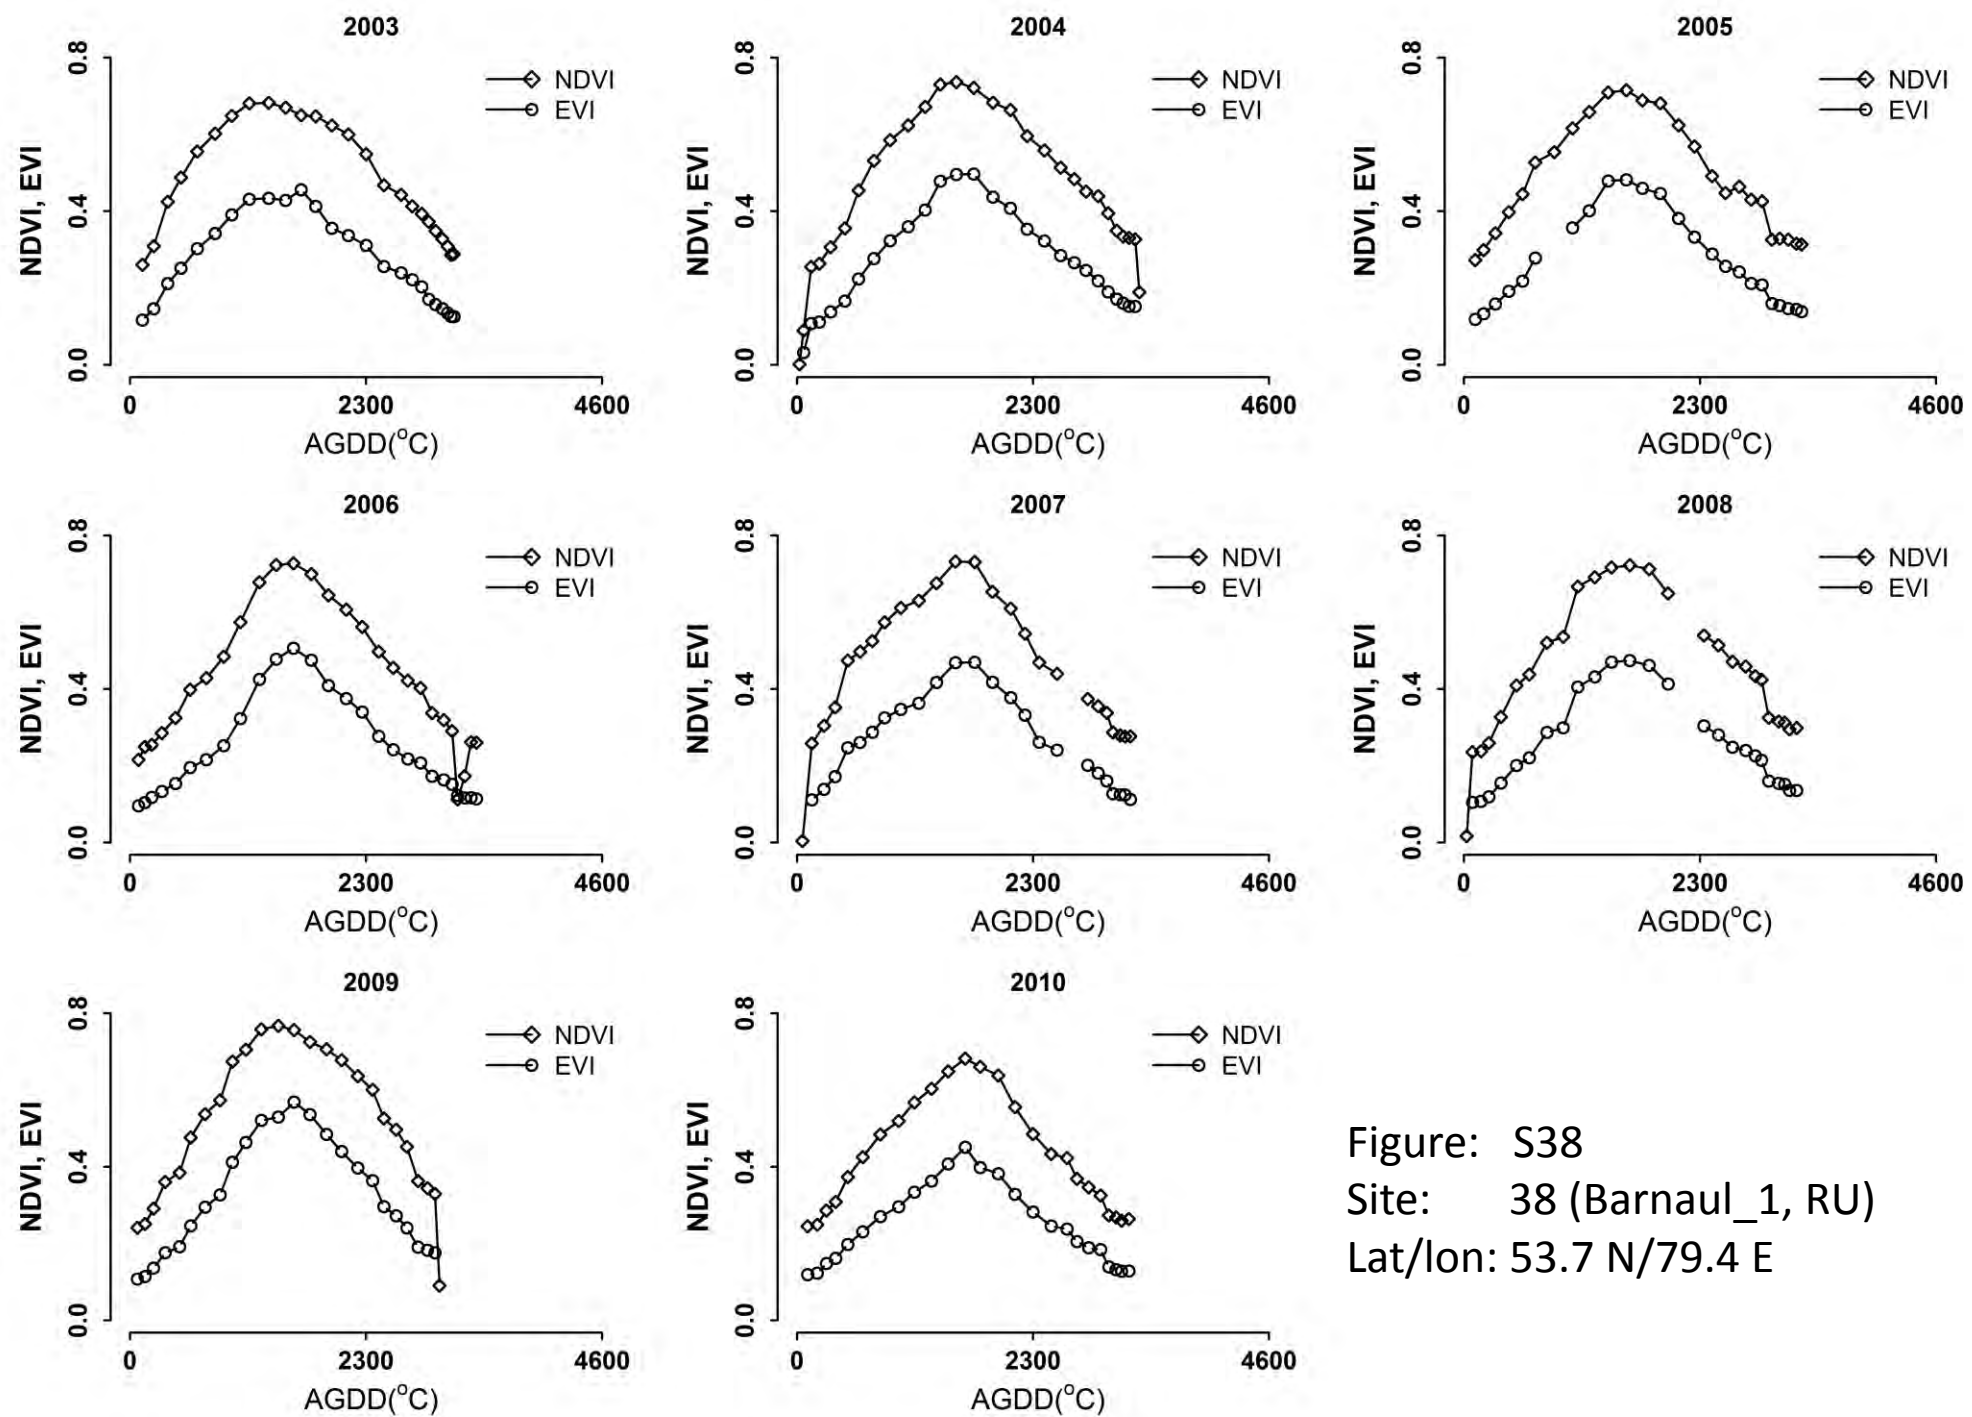

Figure: S38  
 Site: 38 (Barnaul\_1, RU)  
 Lat/Ion: 53.7 N/79.4 E

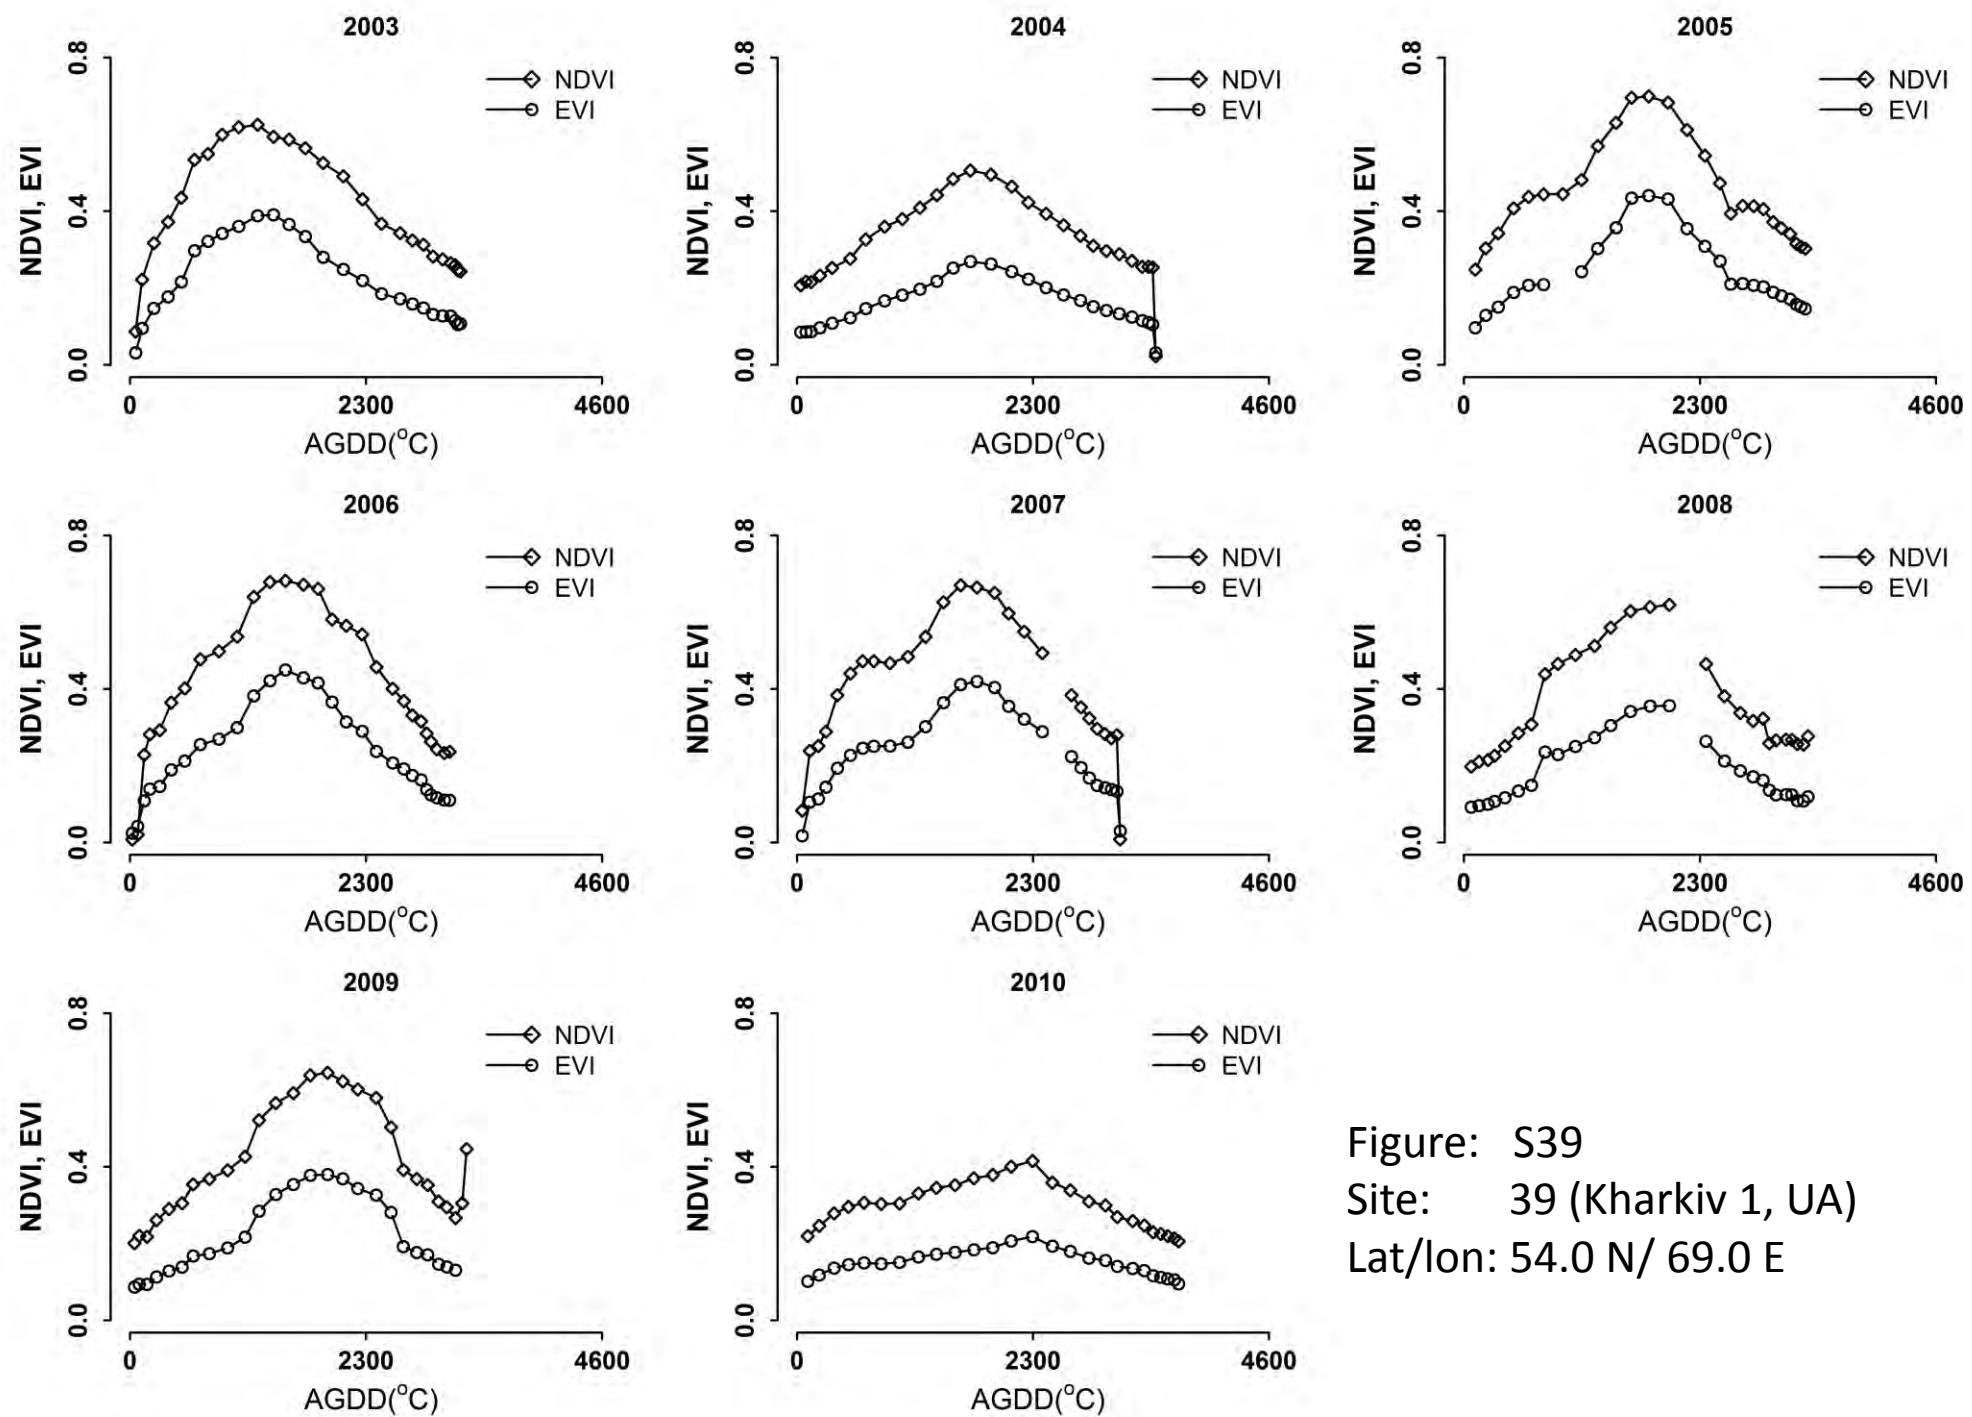

Figure: S39  
Site: 39 (Kharkiv 1, UA)  
Lat/Ion: 54.0 N/ 69.0 E

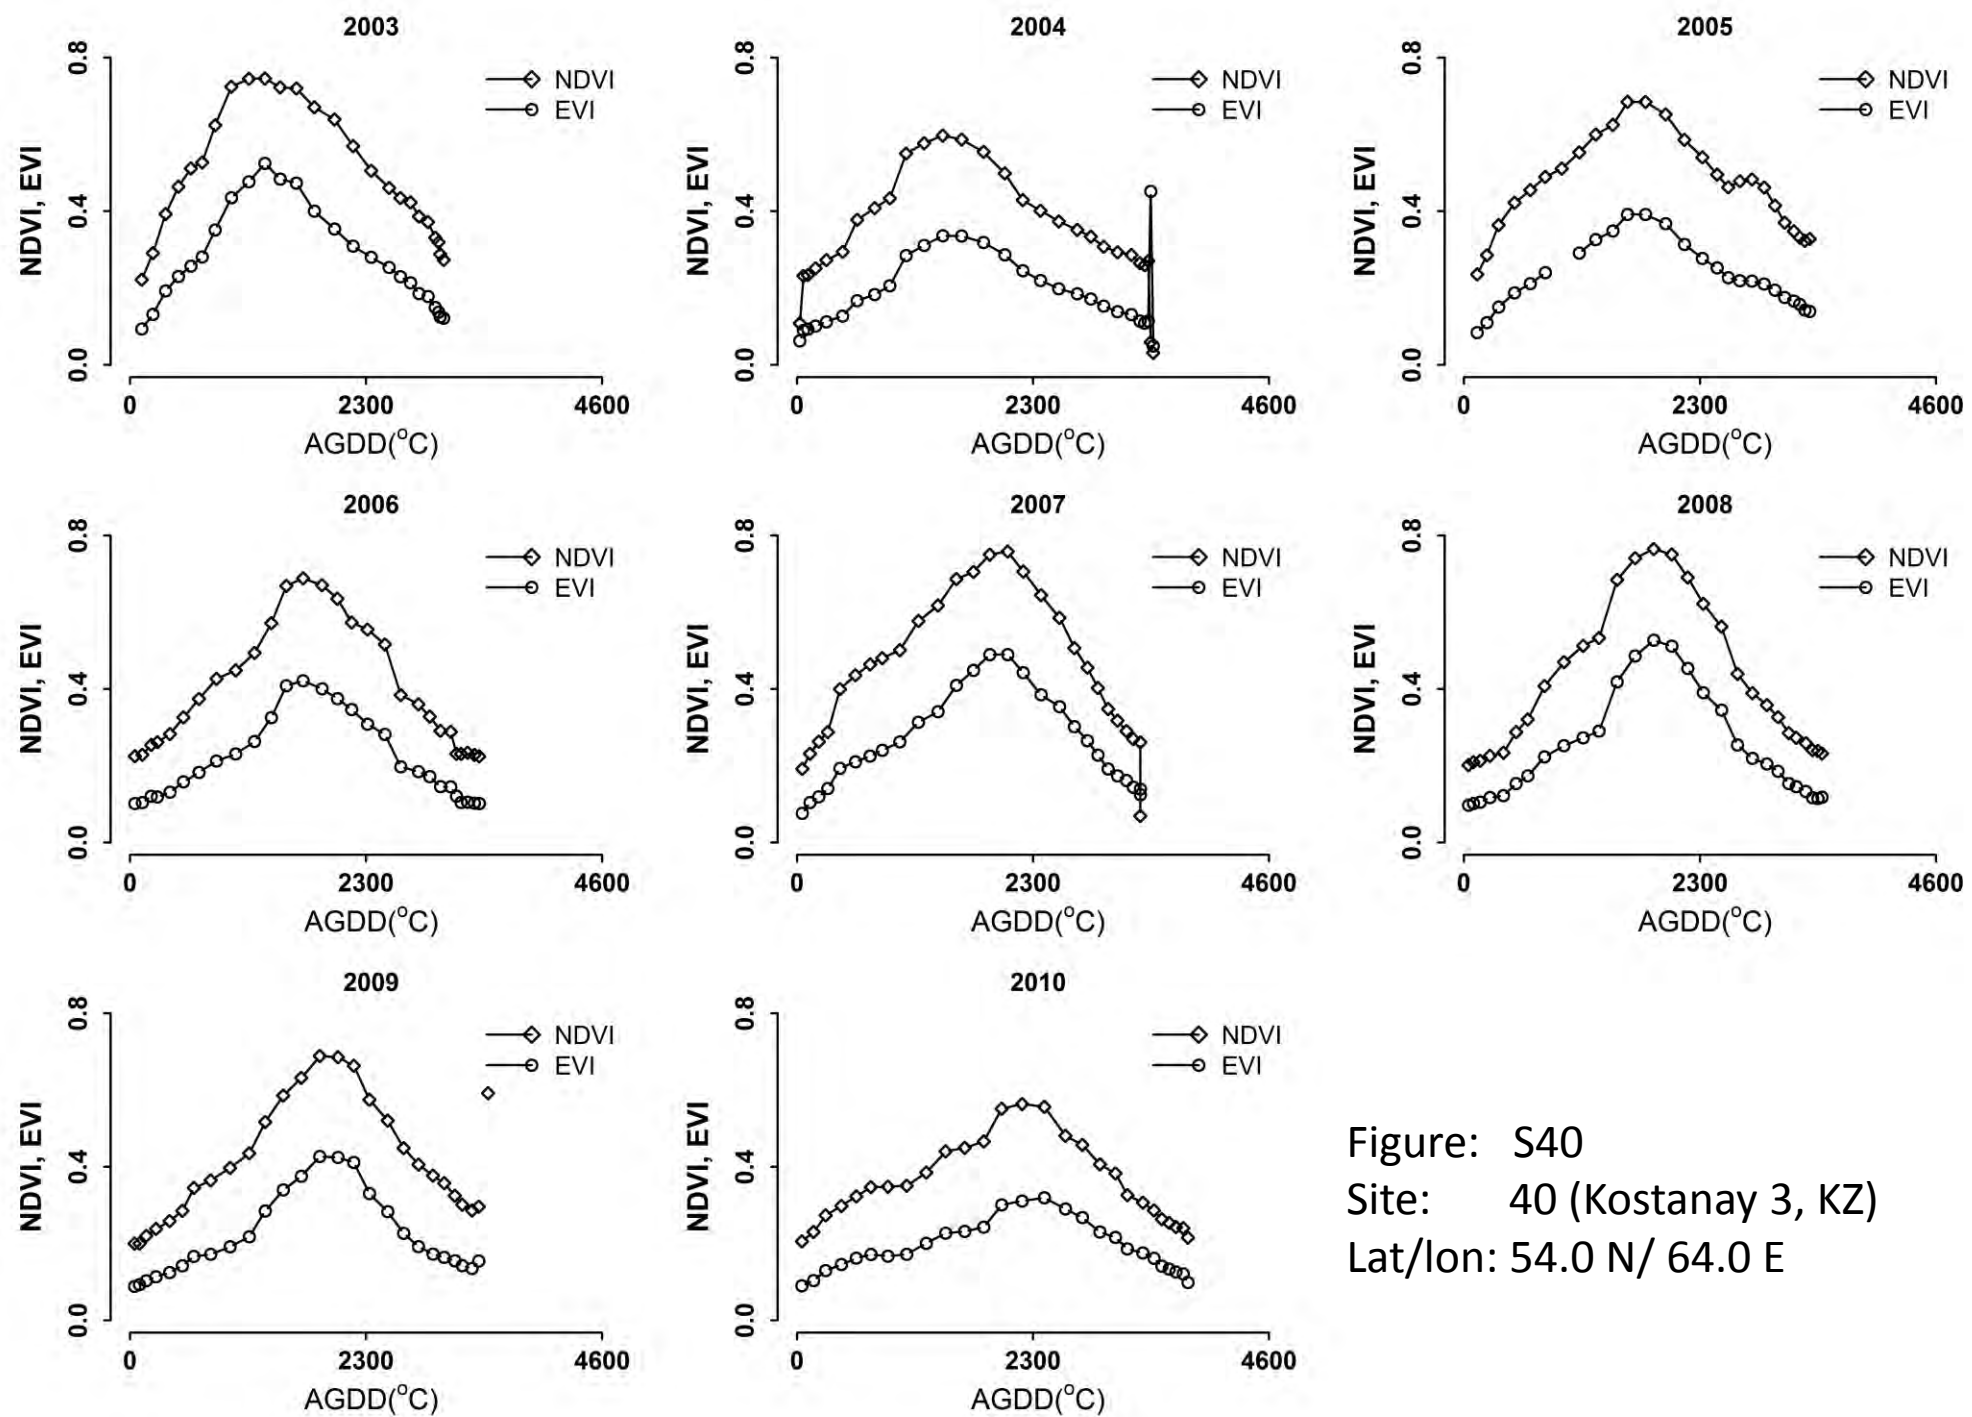

Figure: S40  
 Site: 40 (Kostanay 3, KZ)  
 Lat/Ion: 54.0 N/ 64.0 E

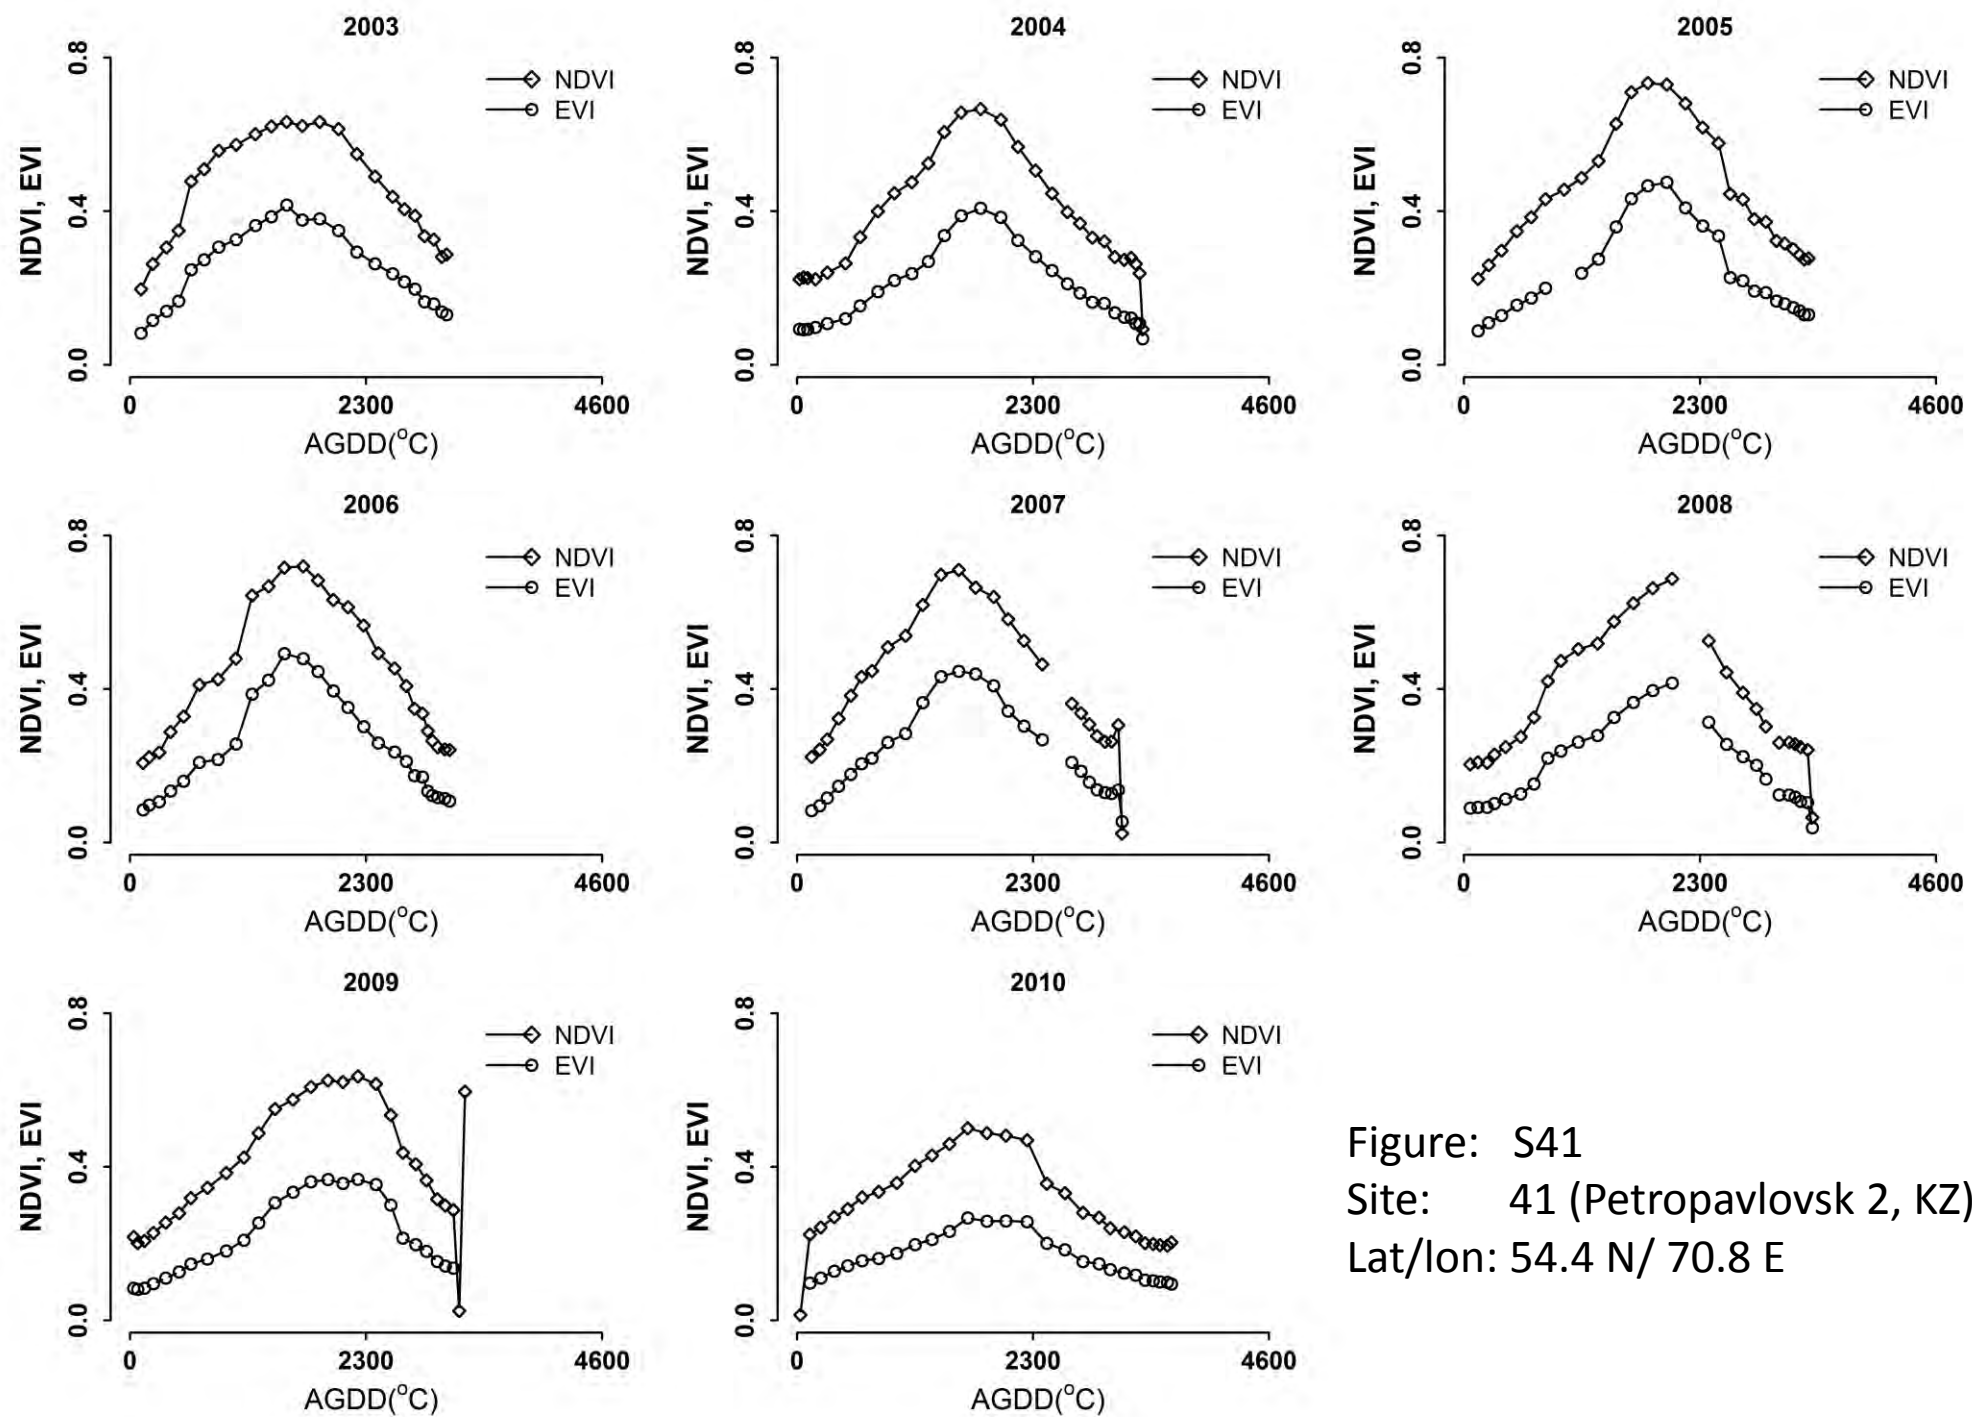

Figure: S41  
Site: 41 (Petropavlovsk 2, KZ)  
Lat/Ion: 54.4 N/ 70.8 E

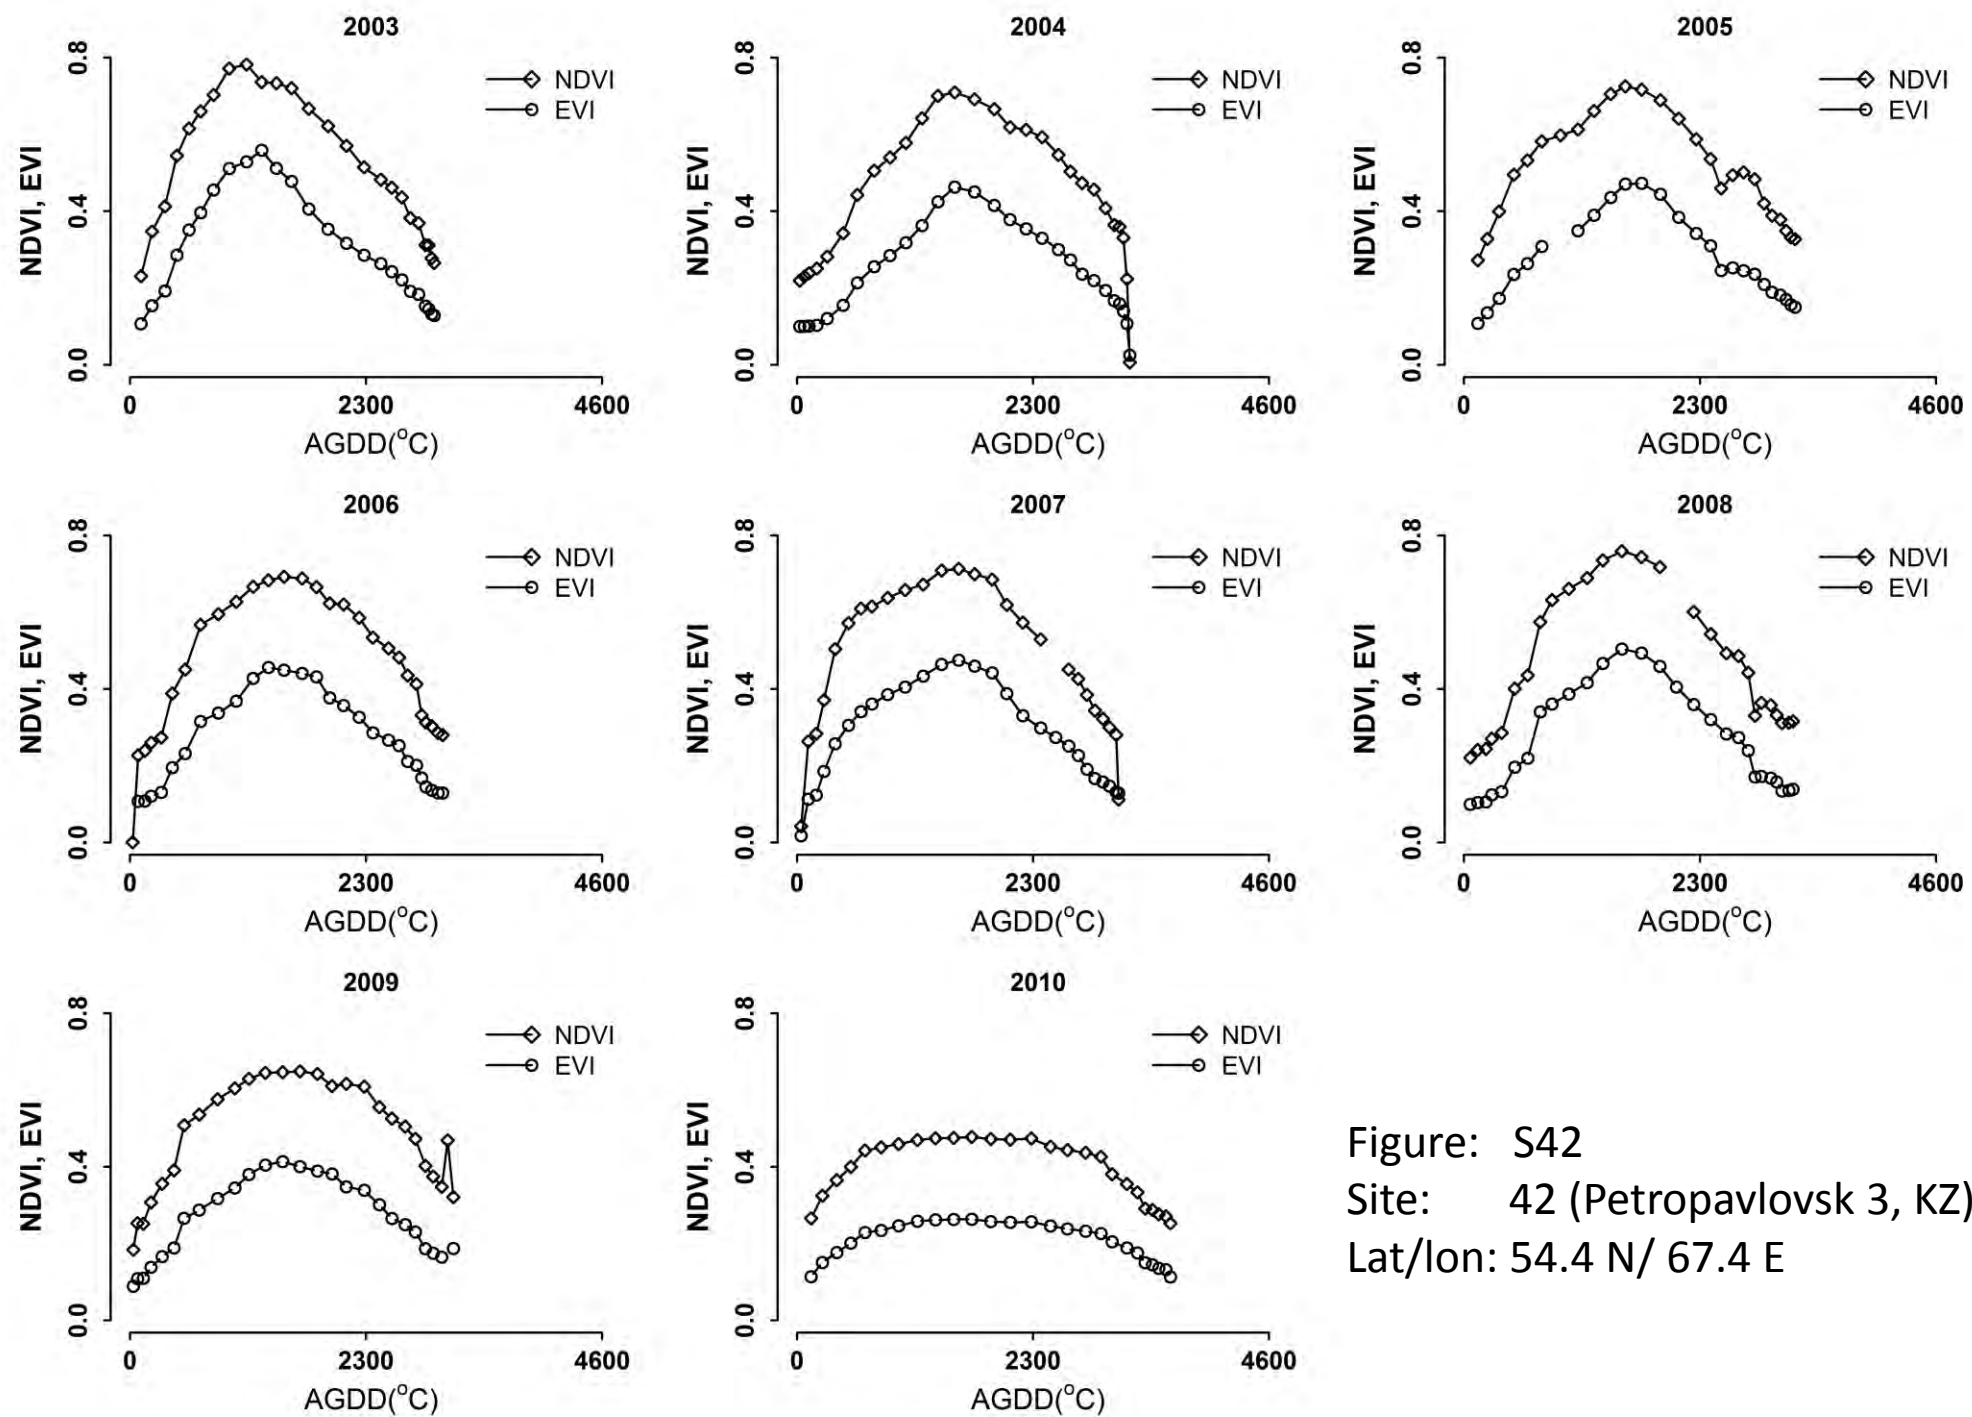

Figure: S42  
 Site: 42 (Petropavlovsk 3, KZ)  
 Lat/Ion: 54.4 N/ 67.4 E

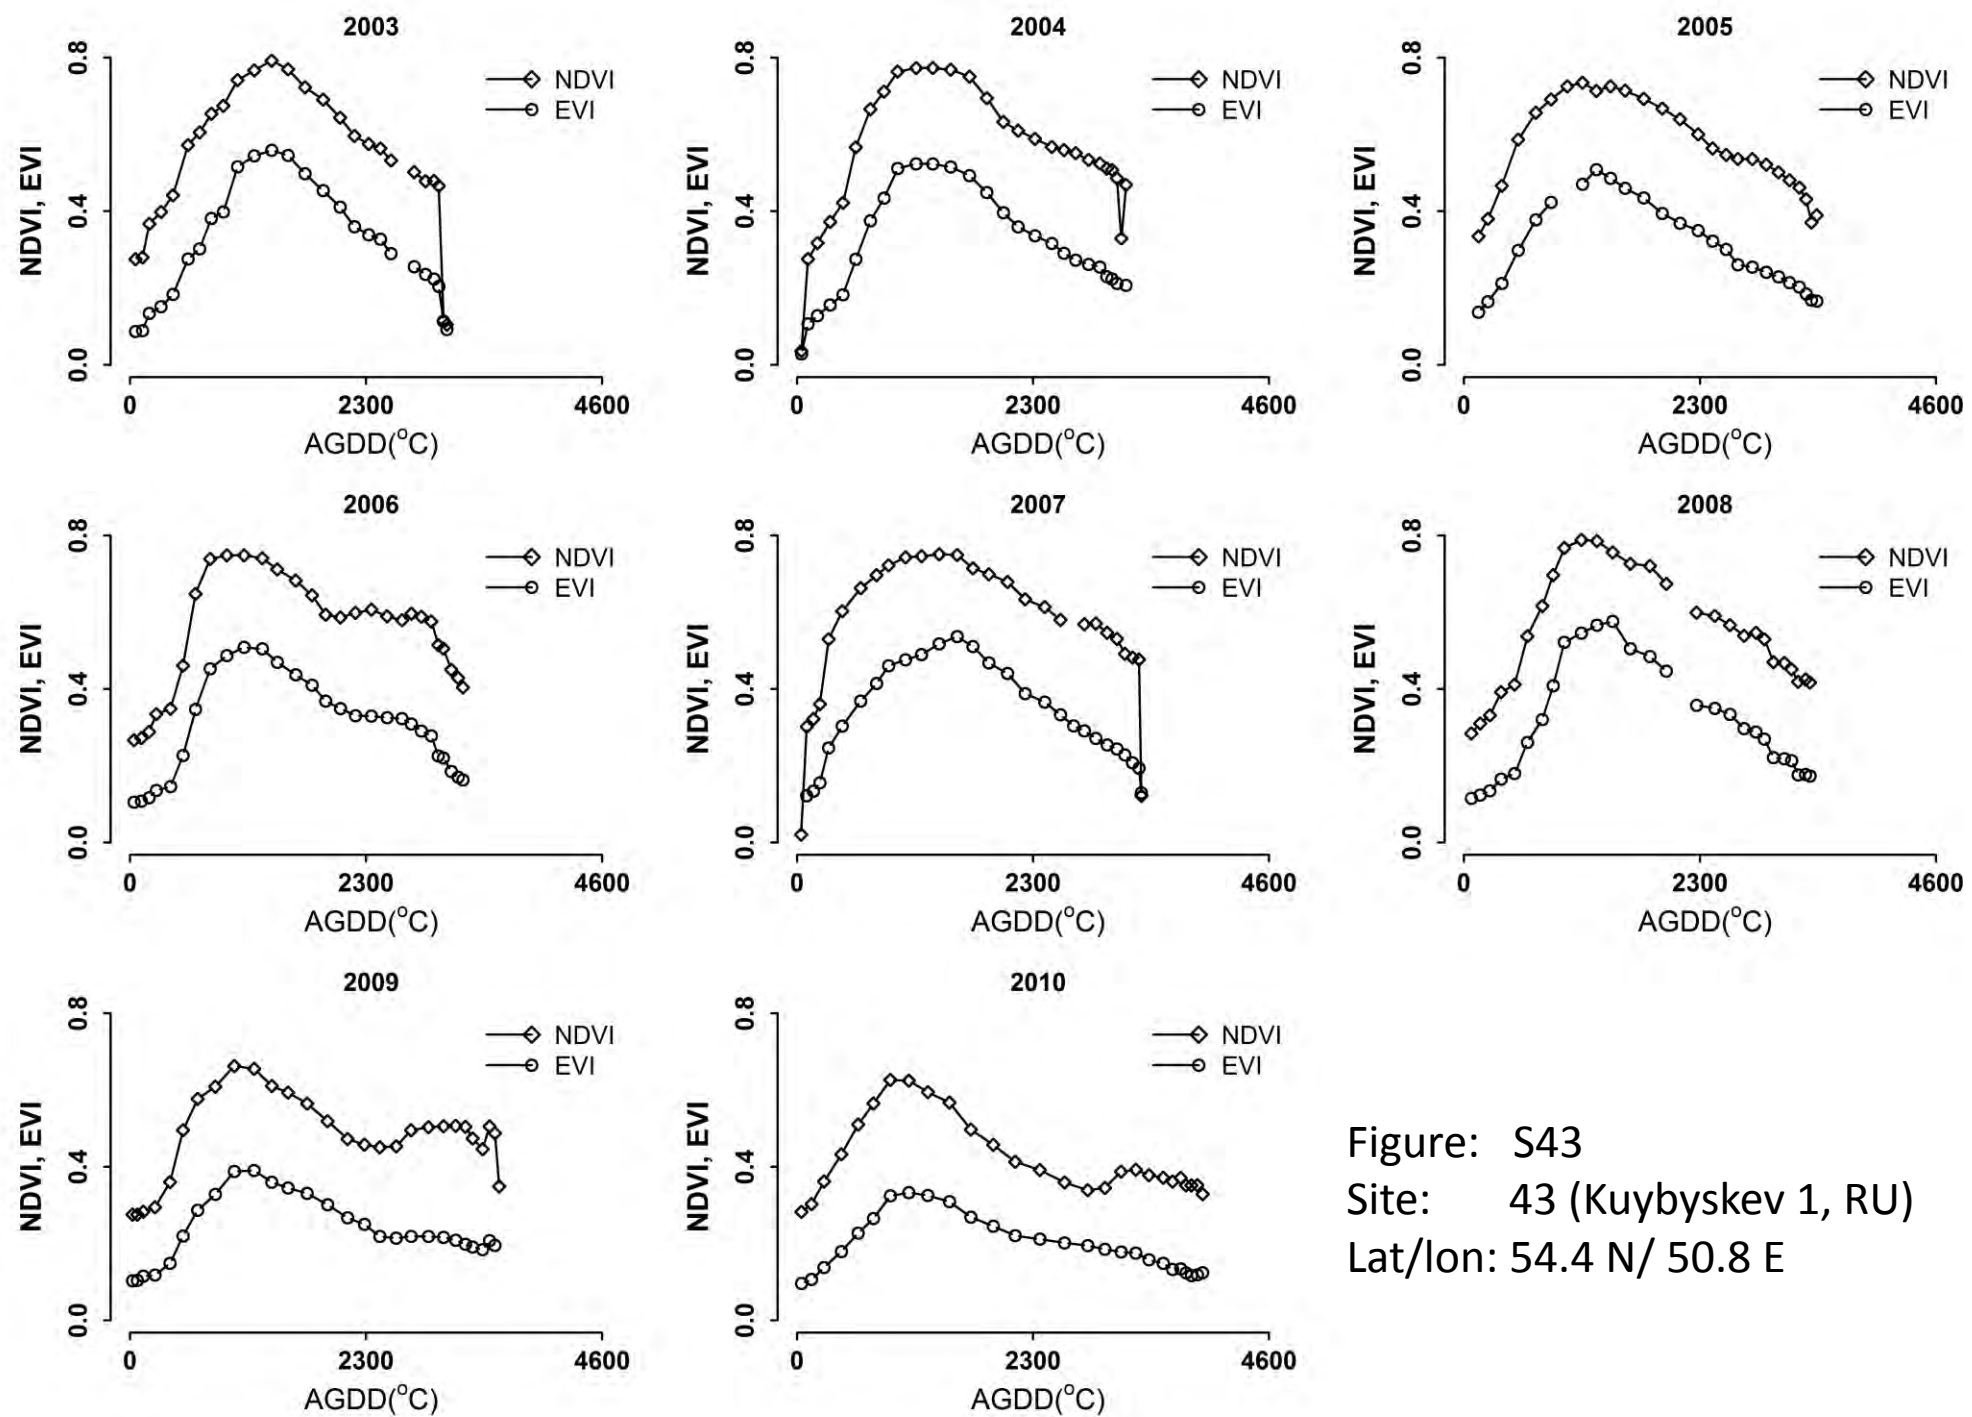

Figure: S43  
Site: 43 (Kuybyshev 1, RU)  
Lat/Ion: 54.4 N/ 50.8 E



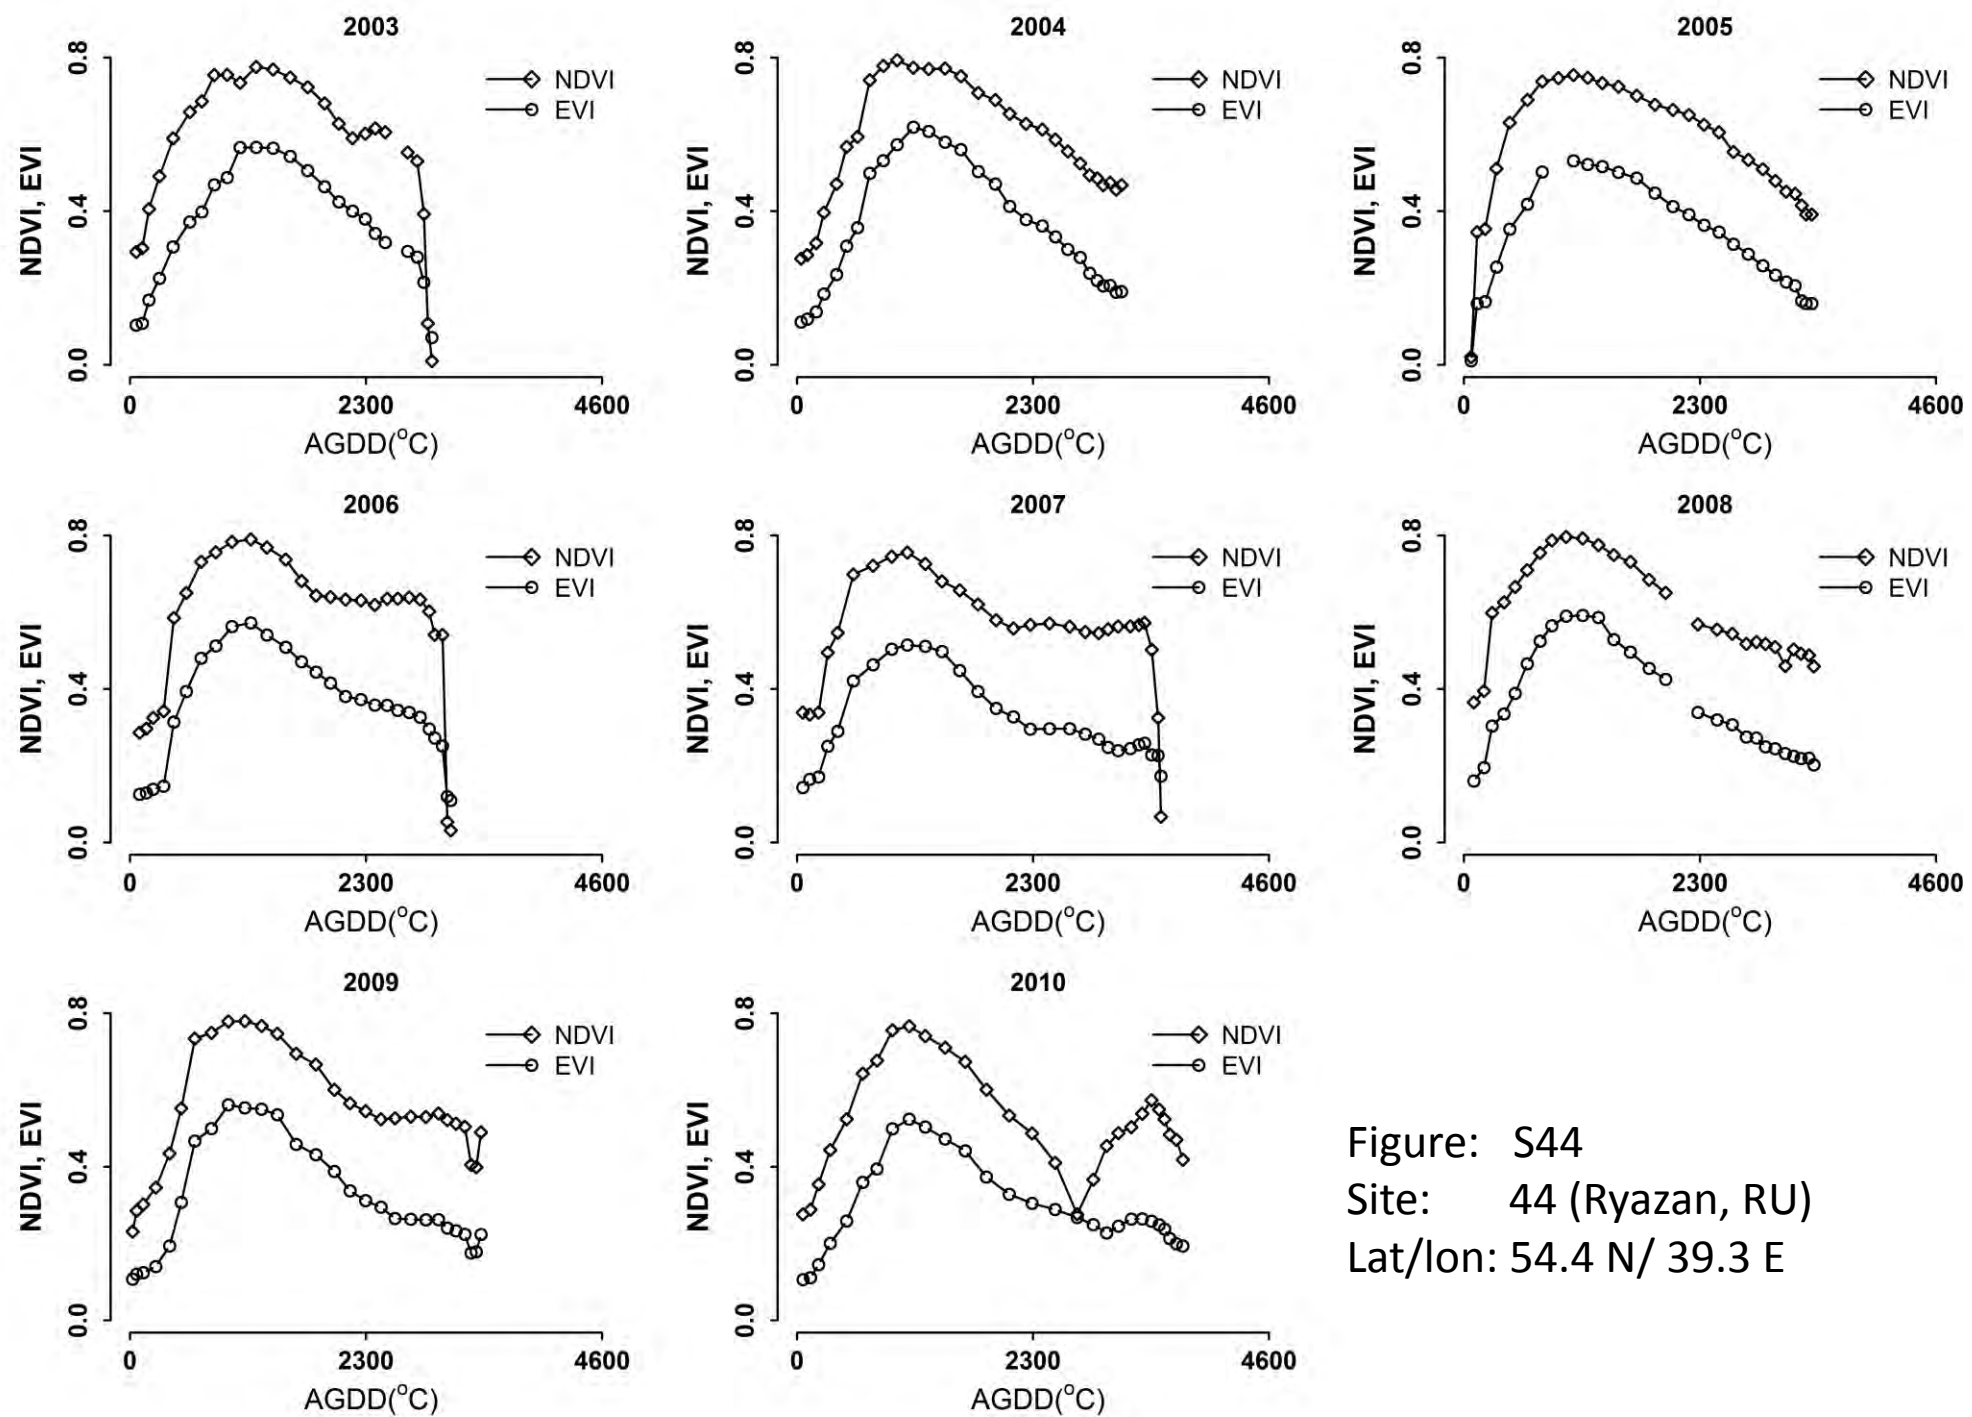

Figure: S44  
 Site: 44 (Ryazan, RU)  
 Lat/Ion: 54.4 N/ 39.3 E

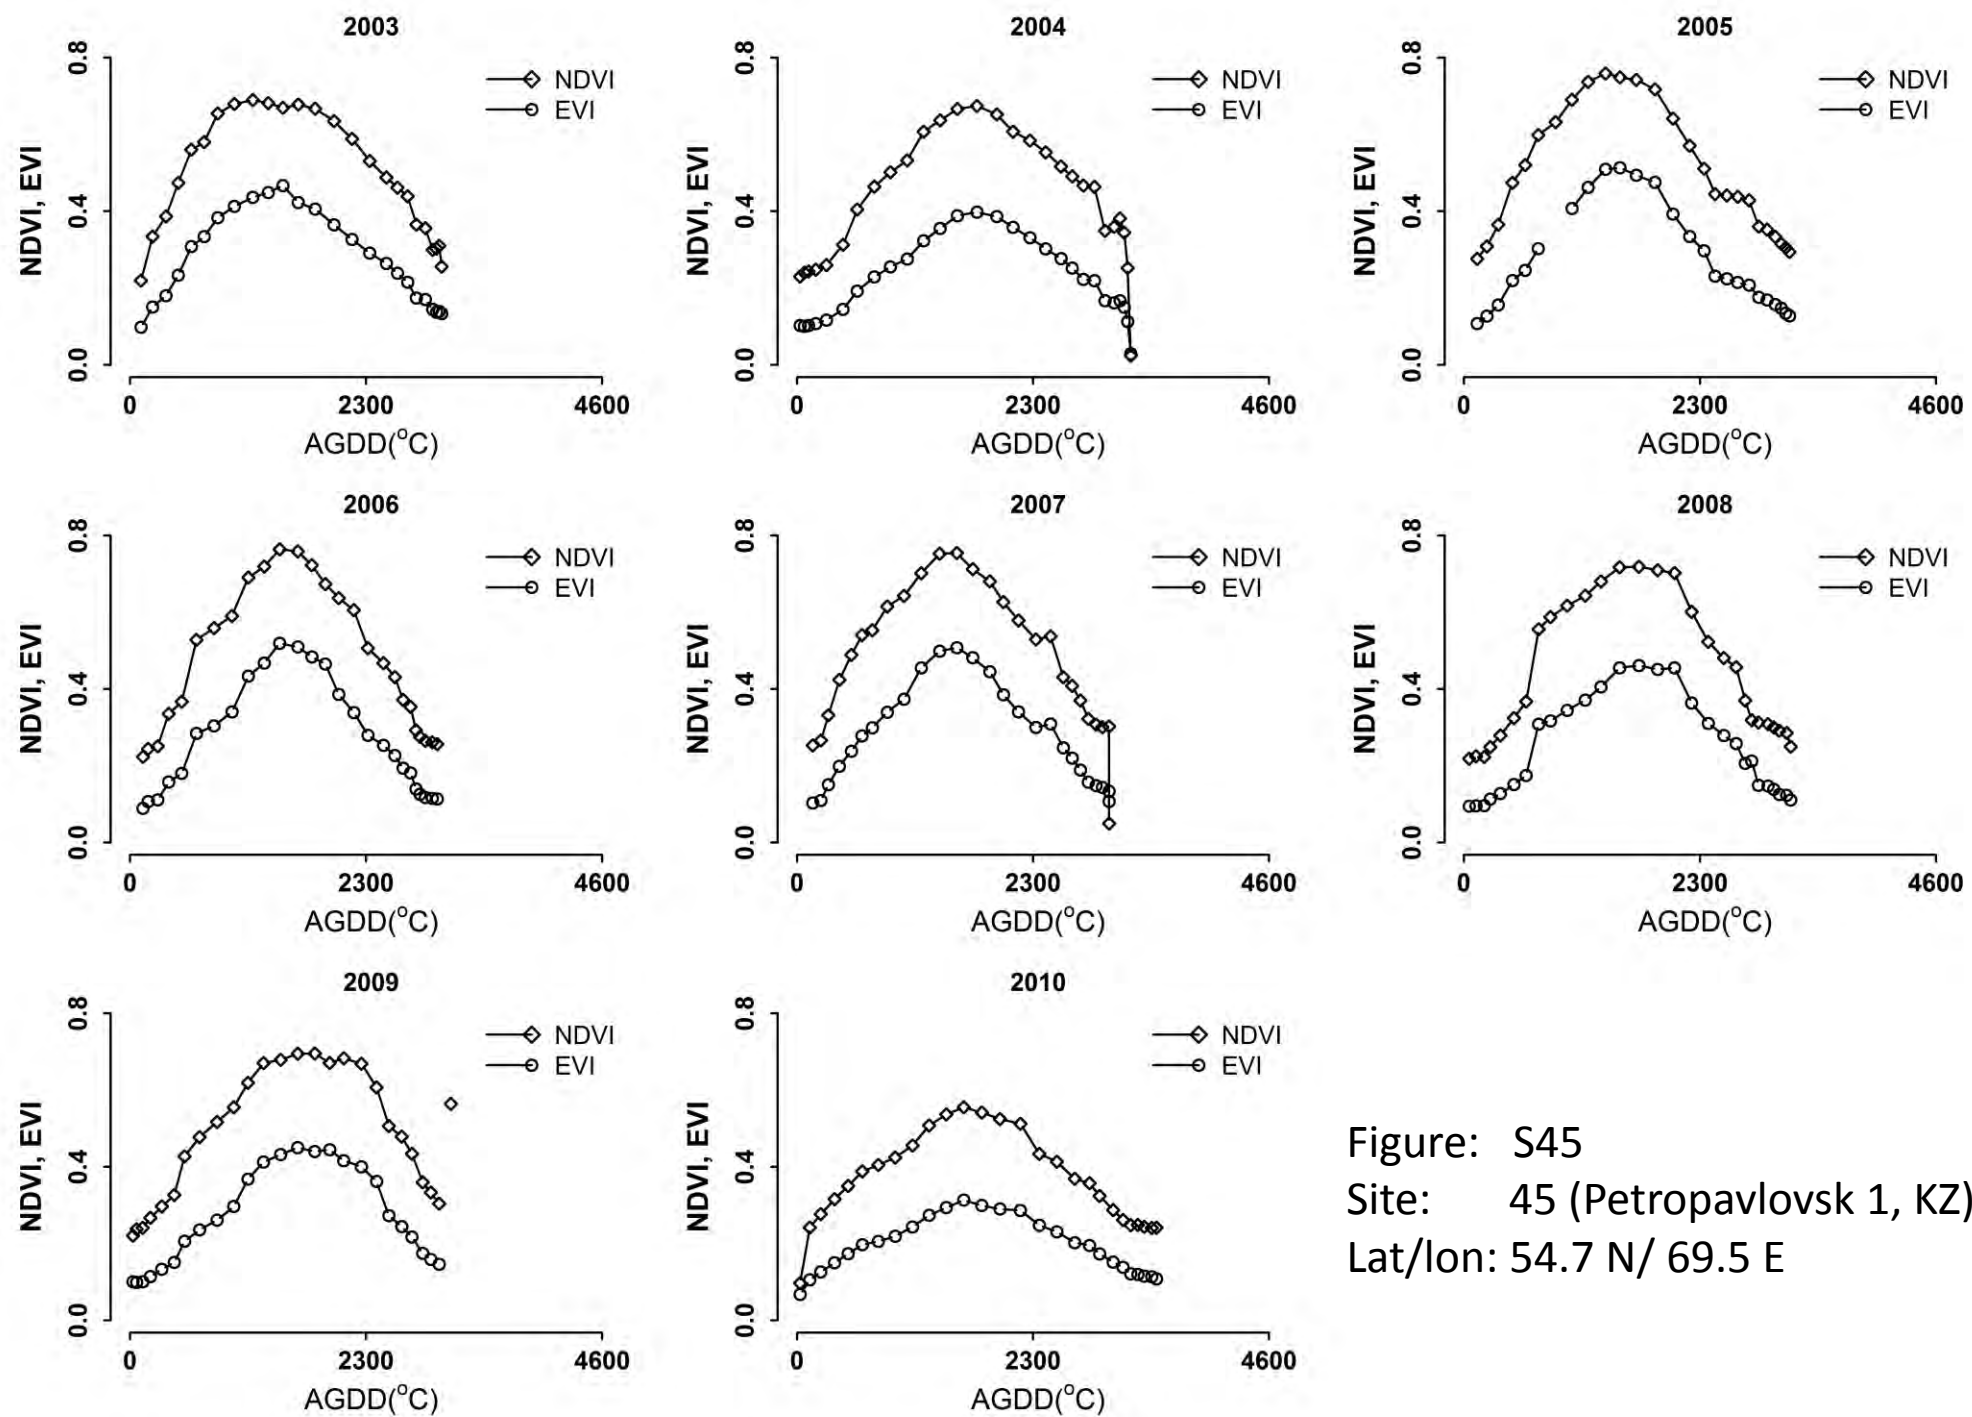

Figure: S45  
Site: 45 (Petropavlovsk 1, KZ)  
Lat/Ion: 54.7 N/ 69.5 E

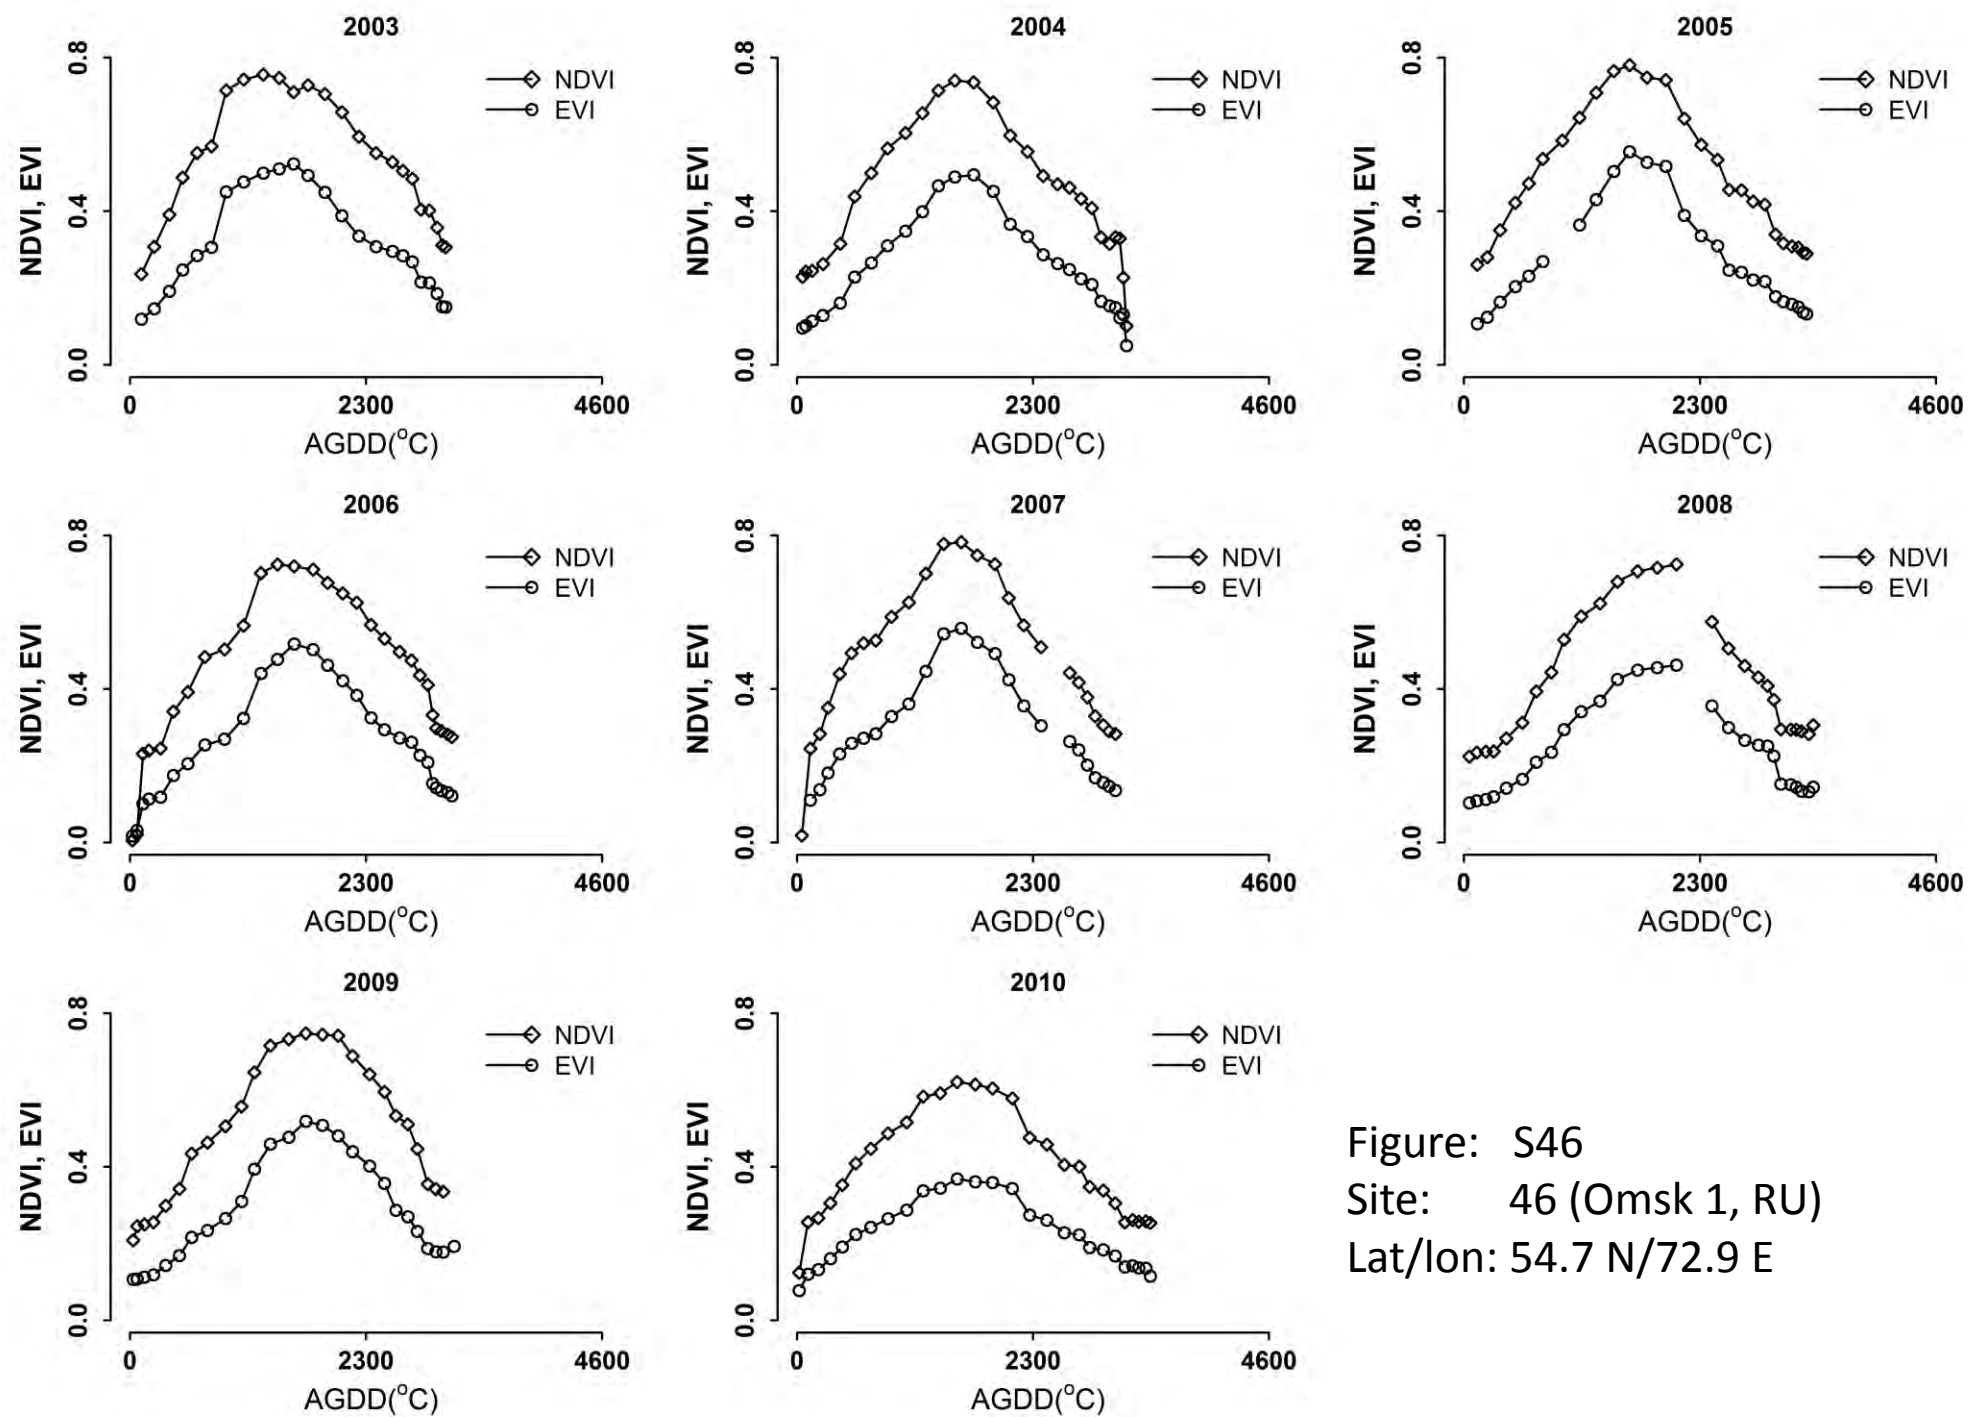

Figure: S46  
 Site: 46 (Omsk 1, RU)  
 Lat/lon: 54.7 N/72.9 E

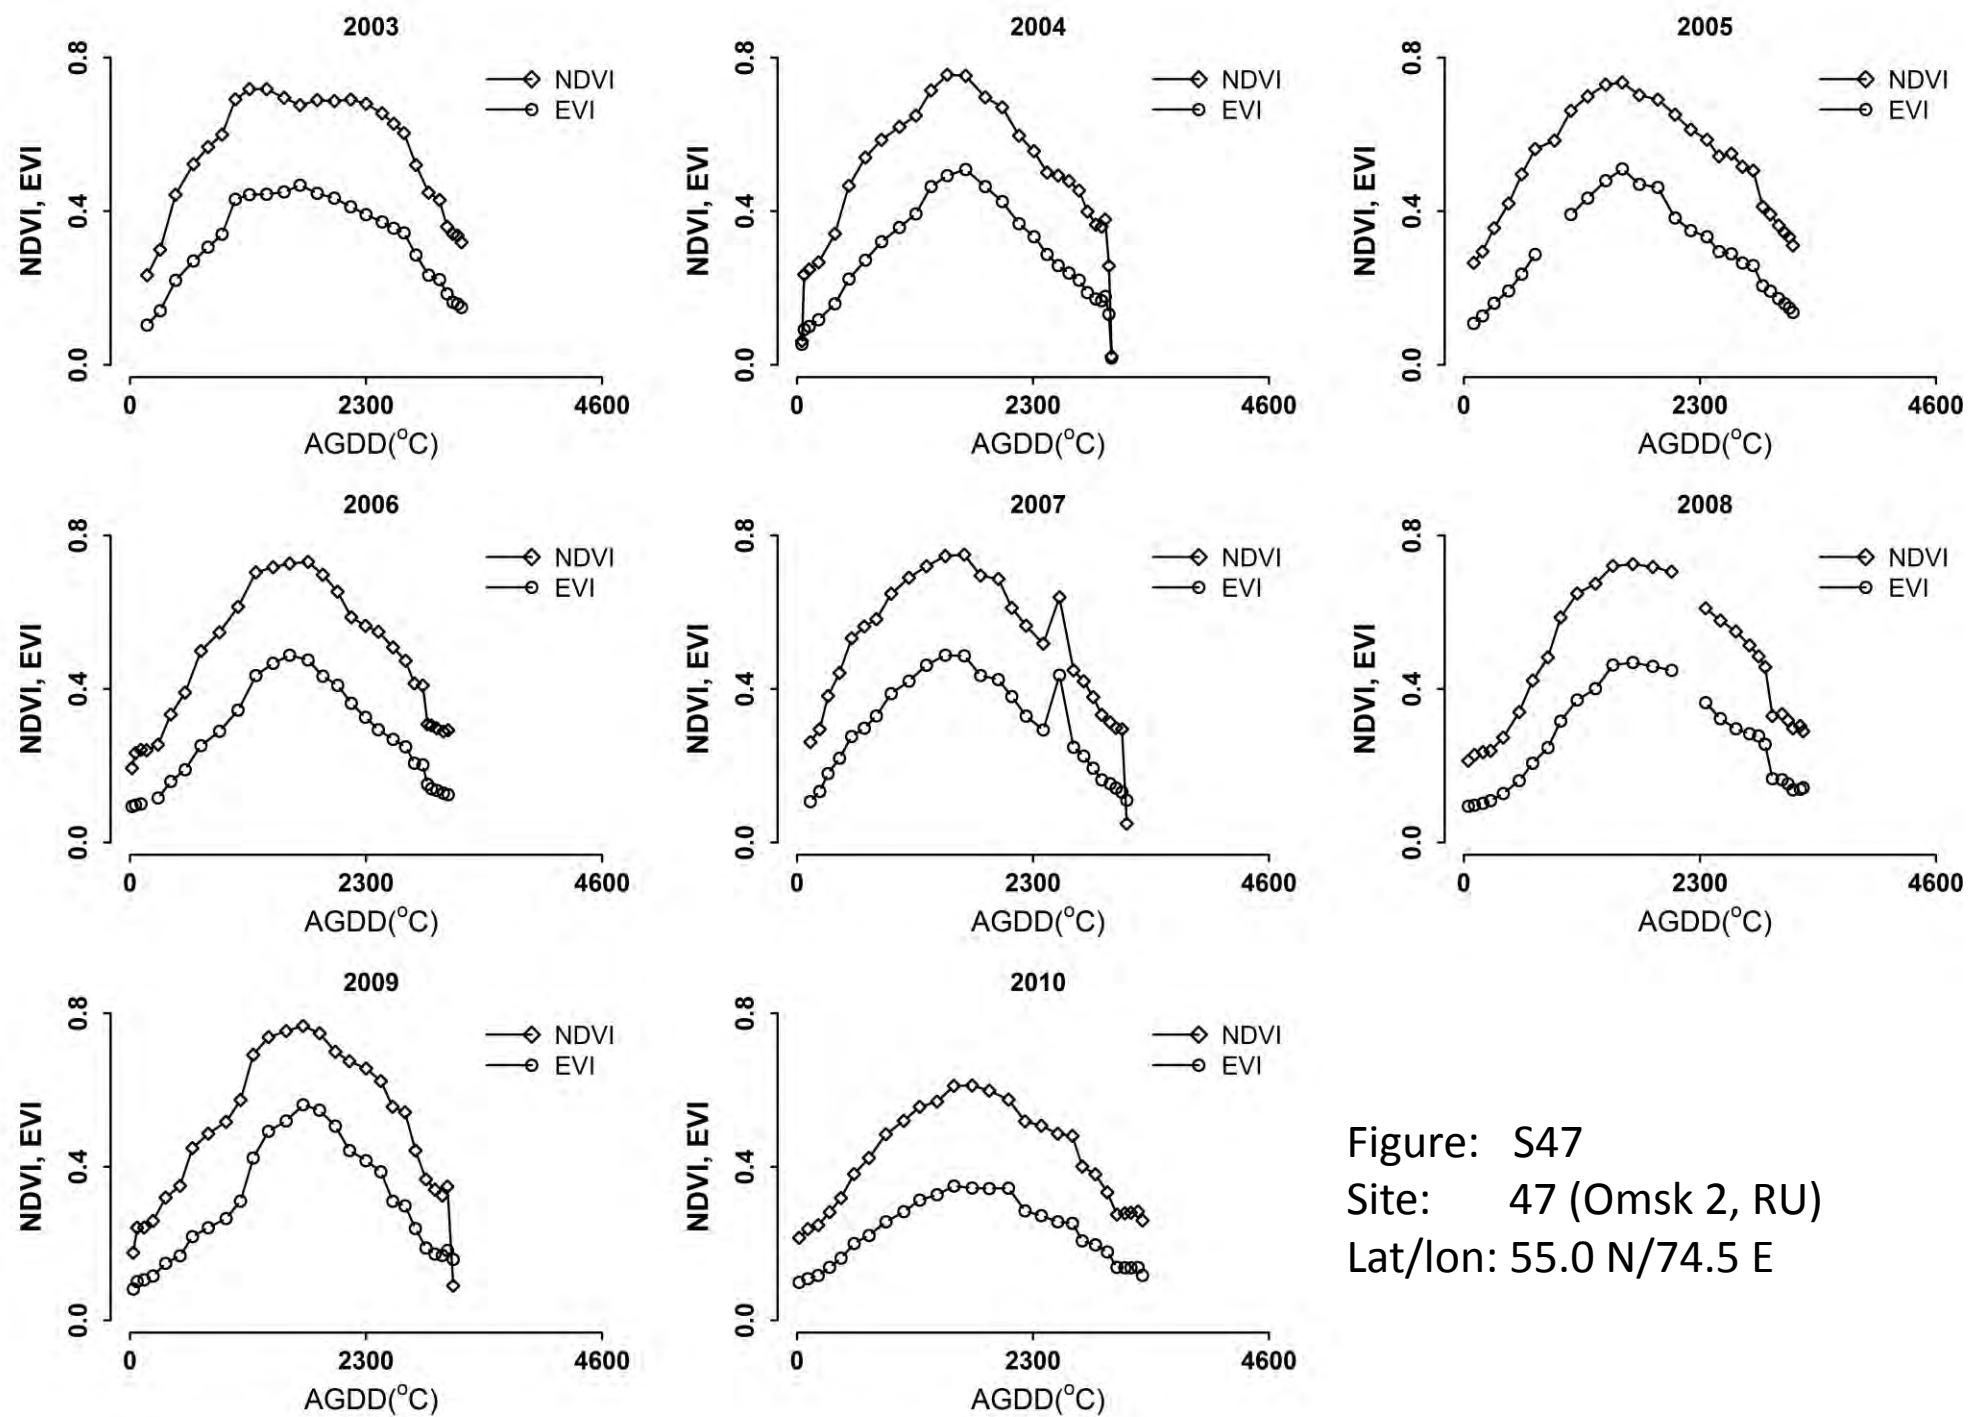

Figure: S47  
Site: 47 (Omsk 2, RU)  
Lat/Ion: 55.0 N/74.5 E

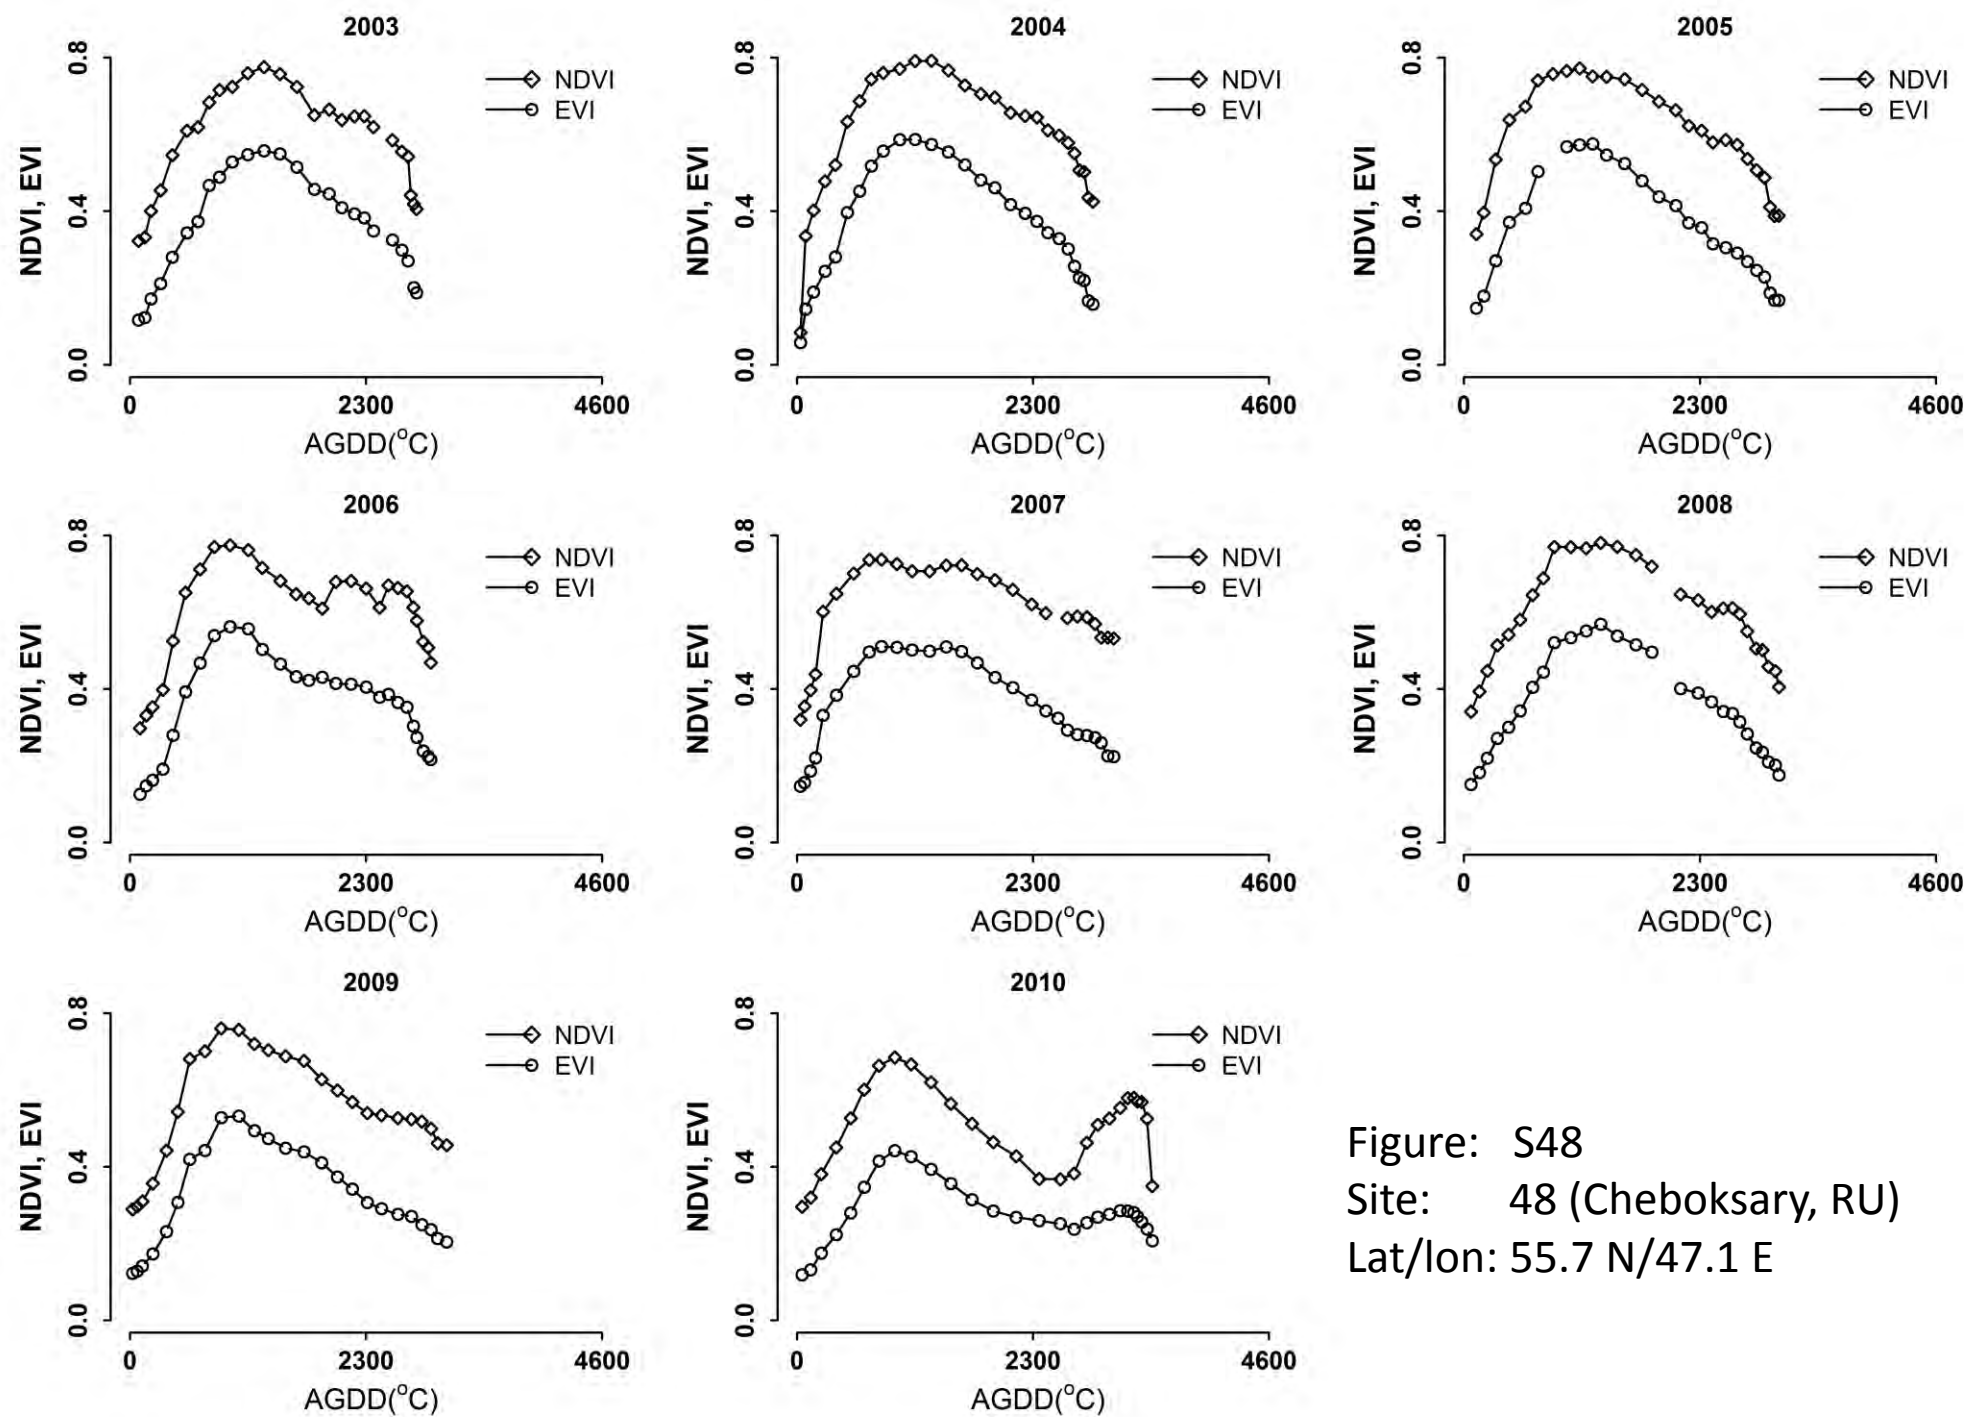

Figure: S48  
 Site: 48 (Cheboksary, RU)  
 Lat/Ion: 55.7 N/47.1 E

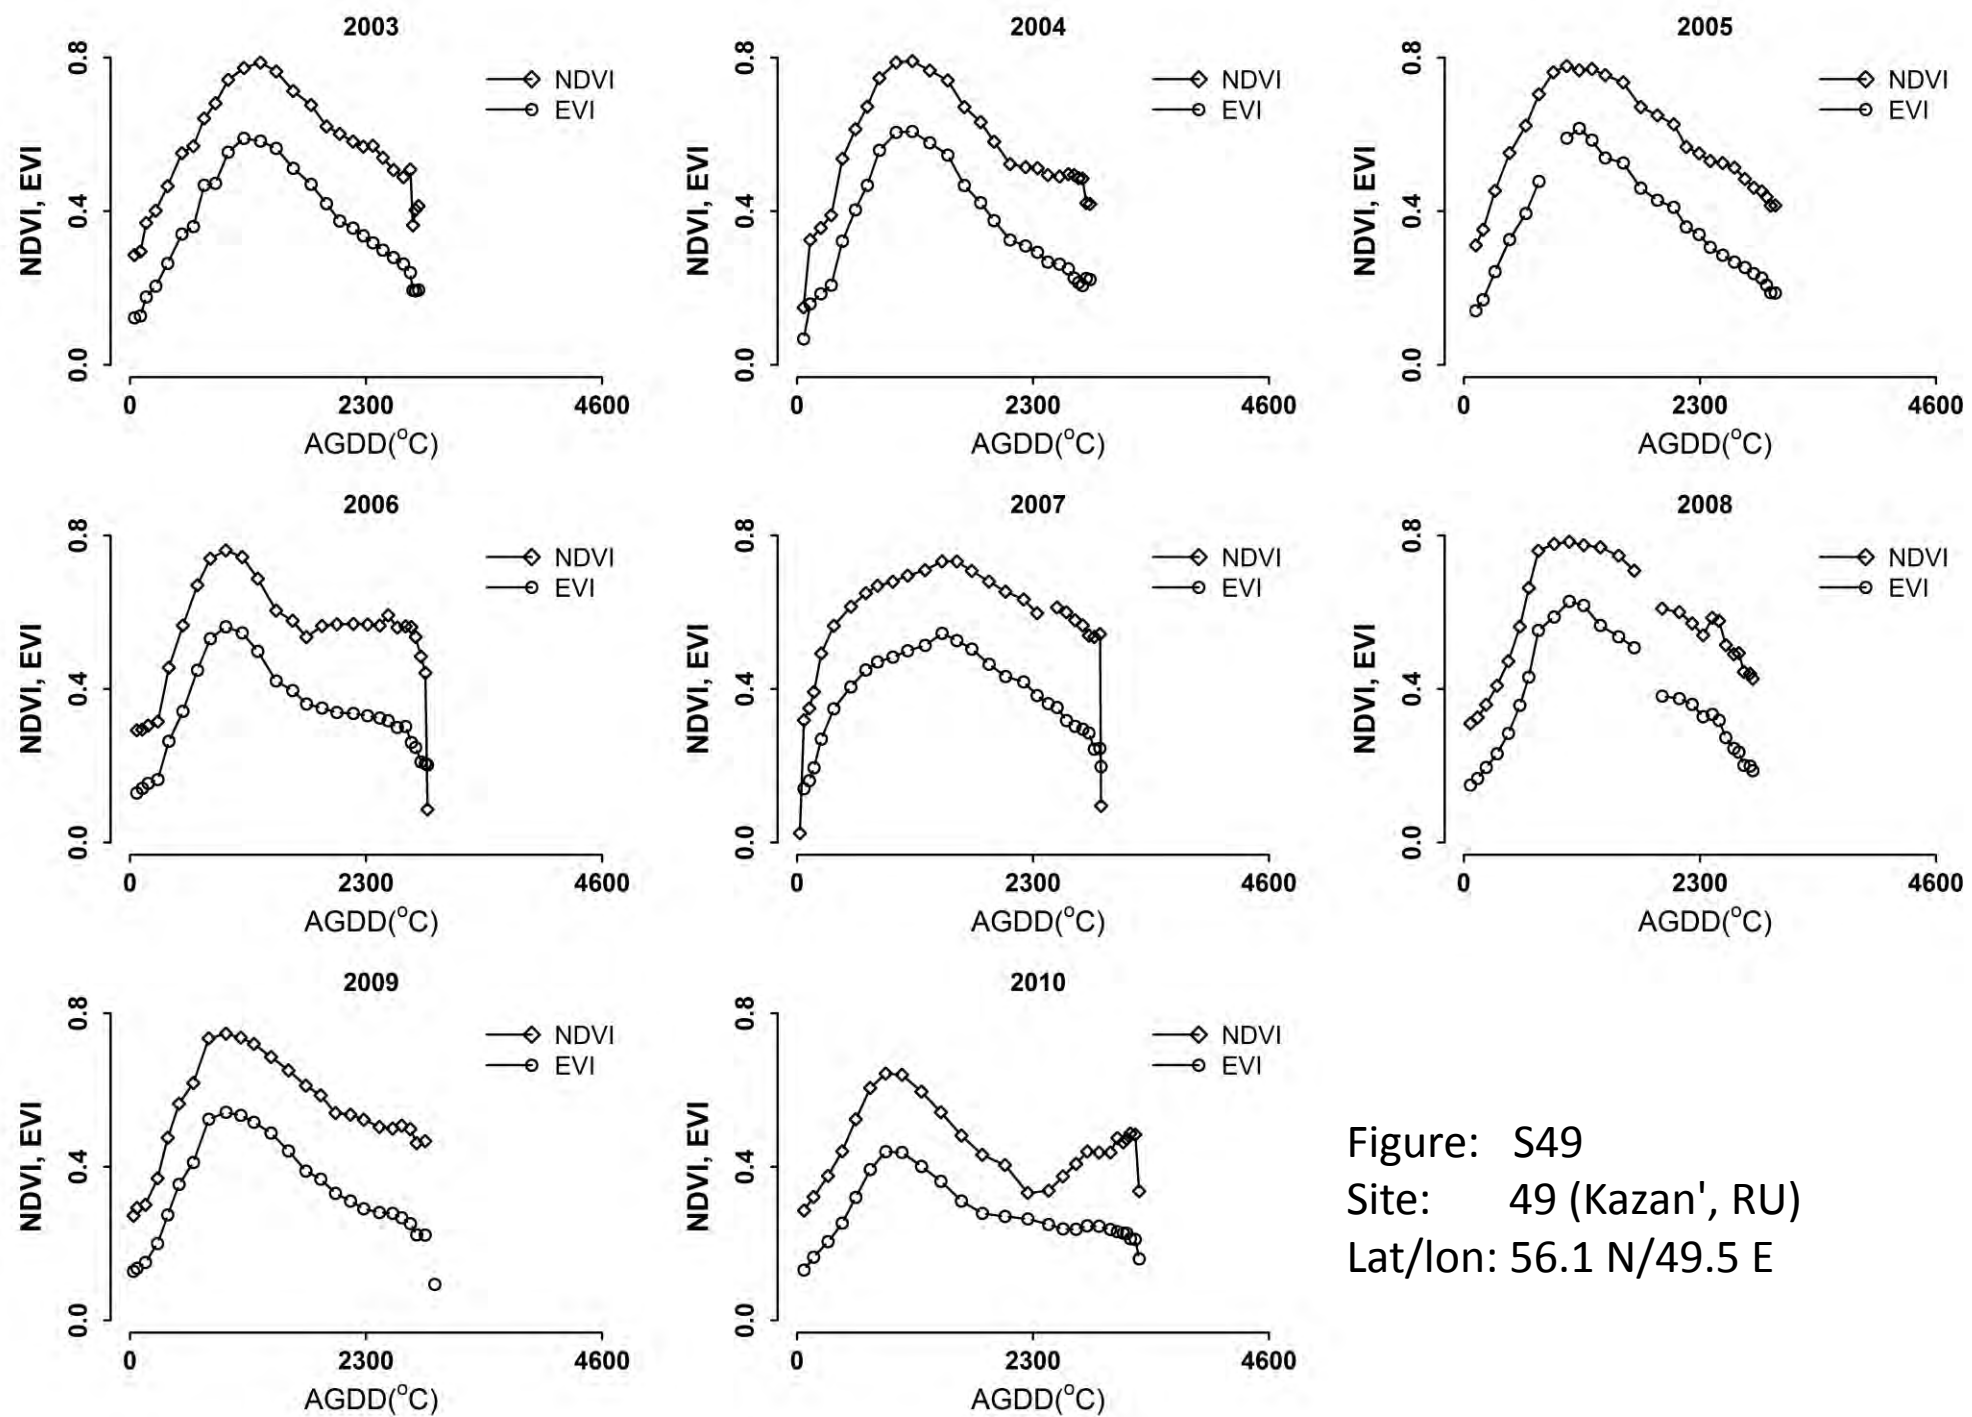

Figure: S49  
 Site: 49 (Kazan', RU)  
 Lat/Ion: 56.1 N/49.5 E
